# Supplementary material for: The development of tertiary amine cationic lipids for safe and efficient siRNA delivery
Source: Royal Society of Chemistry journal article supplement (doi:10.1039/c9bm00494g), 2019-01-01
Supplement: c9bm00494g1.pdf [file c9bm00494g1.pdf]

*Supporting Information for*

**Development of tertiary amine cationic lipids achieves safe and  
efficient siRNA delivering**

Ziming Lin<sup>#</sup>, Moxuel Bao<sup>#</sup>, Zexuan Yu, Lingjing Xue, Caoyun Ju\*, Can Zhang\*

<sup>#</sup>The first two authors contributed equally to this work

State Key Laboratory of Natural Medicines and Jiangsu Key Laboratory of Drug  
Discovery for Metabolic Diseases, Center of New Drug Discovery, China  
Pharmaceutical University, 24 Tong Jia Xiang, Nanjing, 210009, China.

Email: [zhangcan@cpu.edu.cn](mailto:zhangcan@cpu.edu.cn), [jucaoyun@cpu.edu.cn](mailto:jucaoyun@cpu.edu.cn)

**Abbreviations used:**

EDCI: 1-Ethyl-3-(3-dimethylaminopropyl)carbodiimide hydrochloride

HOBt: N-Hydroxybenzotriazole

TEA: Triethylamine

DCM: Dichloromethane.

THF: Tetrahydrofuran

MTT: Methylthiazolyldiphenyl-tetrazolium bromide

FDA: US Food and Drug Administration

PMSF: Phenylmethanesulfonyl fluoride

DOPE: 2-dioleoyl-sn-glycero-3-phosphoethanolamine

LDL-c: Low Density Lipoprotein cholesterol

TCHO: Total Cholesterol

HDL-c: High Density Lipoprotein cholesterol

TG: Total triglyceride

AST: Aspartate aminotransferase

ALT: Alanine aminotransferase

CREA: Creatinine

BUN: Urea Nitrogen

## Method Section

### Synthesis of tertiary amine-based cationic lipids

#### 1.1. ditetradecyl glutamate (**a**)

A stirred solution of L-glutamic acid (20.0 g, 0.14 mol) in toluene (500 mL) was added with *p*-toluenesulfonic acid (28.5 g, 0.15 mol), followed by refluxing for 3 h in an ice bath. Then, the stirred solution was added with myristyl alcohol (61.2 g, 0.29 mol) and refluxed overnight. The solution was evaporated and the residue was dissolved in  $\text{CHCl}_3$  (400 mL). The organic phase was sequentially washed with saturated  $\text{NaHCO}_3$  solution, brine and dried over anhydrous  $\text{Na}_2\text{SO}_4$ , followed by filtration and concentration. The residue was recrystallized in methanol (300 mL) for twice and dried to obtain the compound **a** as white solid (40.8 g, 56% yield).  $^1\text{H}$  NMR (300 MHz,  $\text{CDCl}_3$ ):  $\delta$  (ppm) 4.11 (t,  $J = 6.8$  Hz, 2H,  $\text{COOCH}_2$ ), 4.07 (t,  $J = 6.8$  Hz, 2H,  $\text{COOCH}_2$ ), 3.52 – 3.43 (m, 1H,  $\text{NH}_2\text{CH}$ ), 2.46 (t,  $J = 7.6$  Hz, 2H,  $\text{CH}_2\text{CO}$ ), 2.15 – 2.01 (m, 1H,  $\text{NH}_2\text{CHCH}_2$ ), 1.92 – 1.80 (m, 1H,  $\text{NH}_2\text{CHCH}_2$ ), 1.68 – 1.58 (m, 4H,  $\text{COOCH}_2\text{CH}_2$ ), 1.33 – 1.23 (m, 44H,  $\text{CH}_2$  (myristoyl)), 0.88 (t,  $J = 6.9$  Hz, 6H,  $\text{CH}_2\text{CH}_3$ ). HRMS,  $\text{ESI}^+$ ,  $m/z$ : Calcd for  $\text{C}_{33}\text{H}_{66}\text{NO}_4$  [ $\text{M}+\text{H}$ ] $^+$ , 540.4914; found, 540.5006.

#### 1.2. 4-((1,5-dioxo-1,5-bis(tetradecyloxy)pentan-2-yl)amino)-4-oxobutanoic acid (**b**)

A stirred solution of compound **a** (40.8 g, 75.6 mmol) in THF/DCM (200 mL/200 mL) was added with succinic anhydride (11.3 g, 113.3 mmol) and reacted at room temperature overnight. The solution was evaporated and the residue was recrystallized in methanol (150 mL) for twice and dried to obtain the compound **b** as white solid (40.2 g, 83% yield).  $^1\text{H}$  NMR (300 MHz,  $\text{CDCl}_3$ ):  $\delta$  (ppm) 6.62 (d,  $J = 7.8$  Hz, 1H,  $\text{NH}$ ), 4.66 – 4.56 (m, 1H,  $\text{NHCH}$ ), 4.13 (t,  $J = 6.8$  Hz, 2H,  $\text{COOCH}_2$ ), 4.06 (t,  $J = 6.8$  Hz, 2H,  $\text{COOCH}_2$ ), 2.75 – 2.65 (m, 2H,  $\text{COOHCH}_2$ ), 2.56 (t,  $J = 6.5$  Hz, 2H,  $\text{CH}_2\text{COO}$ ), 2.46 – 2.33 (m, 2H,  $\text{CH}_2\text{CONH}$ ), 2.25 – 2.13 (m, 1H,  $\text{NHCHCH}_2$ ), 2.07 – 1.93 (m, 1H,  $\text{NHCHCH}_2$ ), 1.68 – 1.56 (m, 4H,  $\text{COOCH}_2\text{CH}_2$ ), 1.33 – 1.23 (m, 44H,  $\text{CH}_2$  (myristoyl)), 0.88 (t,  $J = 6.7$  Hz, 6H,  $\text{CH}_2\text{CH}_3$ ).  $^{13}\text{C}$  NMR (75 MHz,  $\text{CDCl}_3$ ):  $\delta$  (ppm) 176.27 (1C,  $\text{COOH}$ ), 173.08 (1C,  $\text{CONHCH}$ ), 171.92 (1C,  $\text{CH}_2\text{COOCH}_2$ ), 171.79

(1C, NHCHCO), 65.94 (1C, COOCH<sub>2</sub>), 65.07 (1C, COOCH<sub>2</sub>), 51.91 (1C, NHCH), 31.90 (2C, CH<sub>2</sub>CH<sub>2</sub>CH<sub>3</sub>), 30.56 (1C, CH<sub>2</sub>COOCH<sub>2</sub>), 30.28 (1C, COOHCH<sub>2</sub>), 29.63 (8C, CH<sub>2</sub>(myristoyl)), 29.57 (2C, CH<sub>2</sub>(myristoyl)), 29.51 (1C, CH<sub>2</sub>(myristoyl)), 29.48 (1C, CH<sub>2</sub>(myristoyl)), 29.33 (2C, CH<sub>2</sub>(myristoyl), 1C, NHCHCH<sub>2</sub>), 29.25 (1C, CH<sub>2</sub>(myristoyl)), 29.19 (1C, CH<sub>2</sub>(myristoyl)), 28.56 (1C, OCH<sub>2</sub>CH<sub>2</sub>), 28.47 (1C, OCH<sub>2</sub>CH<sub>2</sub>), 27.37 (1C, COOHCH<sub>2</sub>CH<sub>2</sub>), 25.87 (1C, OCH<sub>2</sub>CH<sub>2</sub>CH<sub>2</sub>), 25.79 (1C, OCH<sub>2</sub>CH<sub>2</sub>CH<sub>2</sub>), 22.65 (2C, CH<sub>2</sub>CH<sub>3</sub>), 14.06 (2C, CH<sub>2</sub>CH<sub>3</sub>). HRMS, ESI<sup>+</sup>, m/z: Calcd for C<sub>37</sub>H<sub>70</sub>NO<sub>7</sub> [M+H]<sup>+</sup>, 640.5074; found, 640.5127.

### 1.3. General procedure - synthesis of compounds **TA1-TA21**

A stirred solution of compound **b** (500 mg, 0.78 mmol) in CHCl<sub>3</sub> (50 mL) was added with EDCI (240 mg, 1.25 mmol) and HOBT (170 mg, 1.25 mmol) in an ice bath. After stirring for 3 h at room temperature, the solution was added with appropriate primary amine (0.8 mmol) and TEA (330 μL, 2.35 mmol). The reaction mixture was stirred at room temperature for 12 h, and washed with water, 10% citric acid solution and brine successively and dried over anhydrous Na<sub>2</sub>SO<sub>4</sub>, followed by filtration and concentration. The residue was purified by silica gel column chromatography eluting with appropriate mixture as indicated in each case.

#### 1.3.1. *ditetradecyl (4-((2-(dimethylamino)ethyl)amino)-4-oxobutanoyl)glutamate (TA1)*

DCM/methanol (20/1). Yellow granular solid. 39% yield. <sup>1</sup>H NMR (300 MHz, CDCl<sub>3</sub>): δ (ppm) 7.99 (brs, 1H, NHCOCH<sub>2</sub>), 7.38 (d, *J* = 7.5 Hz, 1H, CONHCH), 4.59 – 4.47 (m, 1H, NHCH), 4.10 (t, *J* = 6.6 Hz, 2H, COOCH<sub>2</sub>), 4.05 (t, *J* = 6.7 Hz, 2H, COOCH<sub>2</sub>), 3.68 (brs, 2H, CH<sub>2</sub>CH<sub>2</sub>NH), 3.31 (brs, 2H, CH<sub>2</sub>CH<sub>2</sub>NH), 2.92 (s, 6H, (CH<sub>3</sub>)<sub>2</sub>N), 2.80 – 2.66 (m, 2H, NHCOCH<sub>2</sub>), 2.65 – 2.57 (m, 2H, CH<sub>2</sub>COO), 2.48 – 2.38 (m, 2H, CH<sub>2</sub>CONH), 2.22 – 2.11 (m, 1H, NHCHCH<sub>2</sub>), 2.08 – 1.97 (m, 1H, NHCHCH<sub>2</sub>), 1.67 – 1.57 (m, 4H, COOCH<sub>2</sub>CH<sub>2</sub>), 1.33 – 1.24 (m, 44H, CH<sub>2</sub>(myristoyl)), 0.88 (t, *J* = 6.8 Hz, 6H, CH<sub>2</sub>CH<sub>3</sub>). <sup>13</sup>C NMR (75 MHz, CDCl<sub>3</sub>): δ (ppm) 174.13 (1C, NHCOCH<sub>2</sub>), 173.17 (1C, CONHCH), 172.96 (1C, CH<sub>2</sub>COOCH<sub>2</sub>), 172.28 (1C, NHCHCO), 65.79 (1C, COOCH<sub>2</sub>), 64.97 (1C, COOCH<sub>2</sub>), 57.35 (1C, (CH<sub>3</sub>)<sub>2</sub>NCH<sub>2</sub>),

51.95 (1C, NHCH), 43.65 (2C, (CH<sub>3</sub>)<sub>2</sub>N), 31.92 (2C, CH<sub>2</sub>CH<sub>2</sub>CH<sub>3</sub>), 31.35 (1C, (CH<sub>3</sub>)<sub>2</sub>NCH<sub>2</sub>CH<sub>2</sub>), 31.00 (1C, CH<sub>2</sub>COOCH<sub>2</sub>), 30.38 (1C, NHCOCH<sub>2</sub>CH<sub>2</sub>), 29.71 (8C, CH<sub>2</sub>(myristoyl)), 29.66 (2C, CH<sub>2</sub>(myristoyl)), 29.58 (2C, CH<sub>2</sub>(myristoyl)), 29.36 (4C, CH<sub>2</sub>(myristoyl)), 1C, NHCHCH<sub>2</sub>), 28.58 (1C, OCH<sub>2</sub>CH<sub>2</sub>), 28.49 (1C, OCH<sub>2</sub>CH<sub>2</sub>), 27.00 (1C, COCH<sub>2</sub>CH<sub>2</sub>CO), 25.91 (1C, OCH<sub>2</sub>CH<sub>2</sub>CH<sub>2</sub>), 25.88 (1C, OCH<sub>2</sub>CH<sub>2</sub>CH<sub>2</sub>), 22.68 (2C, CH<sub>2</sub>CH<sub>3</sub>), 14.10 (2C, CH<sub>2</sub>CH<sub>3</sub>). HRMS, ESI<sup>+</sup>, m/z: Calcd for C<sub>41</sub>H<sub>80</sub>N<sub>3</sub>O<sub>6</sub> [M+H]<sup>+</sup>, 710.5969; found, 710.5986.

### 1.3.2. ditetradecyl (4-((3-(dimethylamino)propyl)amino)-4-oxobutanoyl)glutamate (**TA2**)

DCM/methanol (30/1). Yellow-white granular solid. 51% yield. <sup>1</sup>H NMR (300 MHz, CDCl<sub>3</sub>): δ (ppm) 7.41 (brs, 1H, NHCOCH<sub>2</sub>), 6.96 (d, *J* = 7.2 Hz, 1H, CONHCH), 4.55 – 4.51 (m, 1H, NHCH), 4.11 (t, *J* = 6.7 Hz, 2H, COOCH<sub>2</sub>), 4.05 (t, *J* = 6.7 Hz, 2H, COOCH<sub>2</sub>), 3.41 – 3.32 (m, 2H, (CH<sub>3</sub>)<sub>2</sub>NCH<sub>2</sub>CH<sub>2</sub>CH<sub>2</sub>), 2.88 (t, *J* = 6.7 Hz, 2H, NHCOCH<sub>2</sub>), 2.62 (s, 6H, (CH<sub>3</sub>)<sub>2</sub>N), 2.59 – 2.49 (m, 2H, CH<sub>2</sub>COO, 2H, (CH<sub>3</sub>)<sub>2</sub>NCH<sub>2</sub>), 2.44 – 2.33 (m, 2H, CH<sub>2</sub>CONH), 2.24 – 2.11 (m, 1H, NHCHCH<sub>2</sub>), 2.07 – 1.96 (m, 1H, NHCHCH<sub>2</sub>), 1.96 – 1.89 (m, 2H, (CH<sub>3</sub>)<sub>2</sub>NCH<sub>2</sub>CH<sub>2</sub>), 1.67 – 1.56 (m, 4H, COOCH<sub>2</sub>CH<sub>2</sub>), 1.34 – 1.22 (m, 44H, CH<sub>2</sub>(myristoyl)), 0.88 (t, *J* = 6.8 Hz, 6H, CH<sub>2</sub>CH<sub>3</sub>). <sup>13</sup>C NMR (75 MHz, CDCl<sub>3</sub>): δ (ppm) 172.82 (1C, NHCOCH<sub>2</sub>), 172.58 (1C, CONHCH), 172.24 (1C, CH<sub>2</sub>COOCH<sub>2</sub>), 171.93 (1C, NHCHCO), 65.69 (1C, COOCH<sub>2</sub>), 64.89 (1C, COOCH<sub>2</sub>), 56.43 (1C, (CH<sub>3</sub>)<sub>2</sub>NCH<sub>2</sub>CH<sub>2</sub>CH<sub>2</sub>), 51.85 (1C, NHCH), 43.78 (2C, (CH<sub>3</sub>)<sub>2</sub>N), 37.08 (1C, (CH<sub>3</sub>)<sub>2</sub>NCH<sub>2</sub>CH<sub>2</sub>CH<sub>2</sub>), 31.86 (2C, CH<sub>2</sub>CH<sub>2</sub>CH<sub>3</sub>), 31.37 (1C, CH<sub>2</sub>COOCH<sub>2</sub>), 30.31 (1C, NHCOCH<sub>2</sub>CH<sub>2</sub>), 29.60 (8C, CH<sub>2</sub>(myristoyl)), 29.55 (2C, CH<sub>2</sub>(myristoyl)), 29.49 (1C, CH<sub>2</sub>(myristoyl)), 29.46 (1C, CH<sub>2</sub>(myristoyl)), 29.29 (2C, CH<sub>2</sub>(myristoyl)), 1C, NHCHCH<sub>2</sub>), 29.23 (1C, CH<sub>2</sub>(myristoyl)), 29.18 (1C, CH<sub>2</sub>(myristoyl)), 28.56 (1C, OCH<sub>2</sub>CH<sub>2</sub>), 28.47 (1C, OCH<sub>2</sub>CH<sub>2</sub>), 27.26 (1C, COCH<sub>2</sub>CH<sub>2</sub>CO), 25.86 (1C, OCH<sub>2</sub>CH<sub>2</sub>CH<sub>2</sub>), 25.78 (1C, OCH<sub>2</sub>CH<sub>2</sub>CH<sub>2</sub>), 25.03 (1C, (CH<sub>3</sub>)<sub>2</sub>NCH<sub>2</sub>CH<sub>2</sub>), 22.62 (2C, CH<sub>2</sub>CH<sub>3</sub>), 14.04 (2C, CH<sub>2</sub>CH<sub>3</sub>). HRMS, ESI<sup>+</sup>, m/z: Calcd for C<sub>42</sub>H<sub>82</sub>N<sub>3</sub>O<sub>6</sub> [M+H]<sup>+</sup>, 724.6125; found, 724.6164.

### 1.3.3. ditetradecyl (4-((2-(diethylamino)ethyl)amino)-4-oxobutanoyl)glutamate (**TA3**)

DCM/methanol (30/1). Yellow-white solid. 41% yield. <sup>1</sup>H NMR (300 MHz,

CDCl<sub>3</sub>):  $\delta$  (ppm) 6.79 (d,  $J = 7.2$  Hz, 1H, CONHCH), 6.52 (brs, 1H, NHCOCH<sub>2</sub>), 4.63 – 4.53 (m, 1H, NHCH), 4.12 (t,  $J = 6.8$  Hz, 2H, COOCH<sub>2</sub>), 4.05 (t,  $J = 6.8$  Hz, 2H, COOCH<sub>2</sub>), 3.38 – 3.28 (m, 2H, (CH<sub>3</sub>CH<sub>2</sub>)<sub>2</sub>NCH<sub>2</sub>CH<sub>2</sub>), 2.63 – 2.54 (m, 6H, (CH<sub>3</sub>CH<sub>2</sub>)<sub>2</sub>NCH<sub>2</sub>, 2H, NHCOCH<sub>2</sub>CH<sub>2</sub>), 2.49 – 2.30 (m, 2H, CH<sub>2</sub>CONH, 2H, CH<sub>2</sub>COO), 2.26 – 2.12 (m, 1H, NHCHCH<sub>2</sub>), 2.05 – 1.91 (m, 1H, NHCHCH<sub>2</sub>), 1.70 – 1.55 (m, 4H, COOCH<sub>2</sub>CH<sub>2</sub>), 1.40 – 1.20 (m, 44H, CH<sub>2</sub>(myristoyl)), 1.04 (t,  $J = 7.2$  Hz, 6H, CH<sub>2</sub>CH<sub>3</sub>), 0.88 (t,  $J = 6.8$  Hz, 6H, CH<sub>2</sub>CH<sub>3</sub>(myristoyl)). <sup>13</sup>C NMR (75 MHz, CDCl<sub>3</sub>):  $\delta$  (ppm) 172.83 (1C, NHCOCH<sub>2</sub>), 172.11 (1C, CONHCH), 171.89 (1C, CH<sub>2</sub>COOCH<sub>2</sub>, 1C, NHCHCO), 65.72 (1C, COOCH<sub>2</sub>), 64.91 (1C, COOCH<sub>2</sub>), 51.77 (1C, NHCH), 51.47 (1C, (CH<sub>3</sub>CH<sub>2</sub>)<sub>2</sub>NCH<sub>2</sub>), 46.70 (1C, (CH<sub>3</sub>CH<sub>2</sub>)<sub>2</sub>NCH<sub>2</sub>CH<sub>2</sub>), 36.78 (2C, CH<sub>2</sub>CH<sub>3</sub>), 31.91 (2C, CH<sub>2</sub>CH<sub>2</sub>CH<sub>3</sub>), 31.52 (1C, CH<sub>2</sub>COOCH<sub>2</sub>), 30.30 (1C, COCH<sub>2</sub>CH<sub>2</sub>CO), 29.64 (8C, CH<sub>2</sub>(myristoyl)), 29.58 (2C, CH<sub>2</sub>(myristoyl)), 29.52 (1C, CH<sub>2</sub>(myristoyl)), 29.49 (1C, CH<sub>2</sub>(myristoyl)), 29.34 (2C, CH<sub>2</sub>(myristoyl), 1C, NHCHCH<sub>2</sub>), 29.27 (1C, CH<sub>2</sub>(myristoyl)), 29.21 (1C, CH<sub>2</sub>(myristoyl)), 28.59 (1C, OCH<sub>2</sub>CH<sub>2</sub>), 28.49 (1C, OCH<sub>2</sub>CH<sub>2</sub>), 27.44 (1C, COCH<sub>2</sub>CH<sub>2</sub>CO), 25.89 (1C, OCH<sub>2</sub>CH<sub>2</sub>CH<sub>2</sub>), 25.80 (1C, OCH<sub>2</sub>CH<sub>2</sub>CH<sub>2</sub>), 22.67 (2C, CH<sub>2</sub>(myristoyl)CH<sub>3</sub>), 14.09 (2C, CH<sub>2</sub>CH<sub>3</sub>(myristoyl)), 11.33 (2C, CH<sub>2</sub>CH<sub>3</sub>). HRMS, ESI<sup>+</sup>,  $m/z$ : Calcd for C<sub>43</sub>H<sub>83</sub>N<sub>3</sub>O<sub>6</sub>Na [M+Na]<sup>+</sup>, 760.6180; found, 760.6196.

**1.3.4. ditetradecyl (4-((3-(diethylamino)propyl)amino)-4-oxobutanoyl)glutamate (TA4)**

DCM/methanol (40/1). White solid. 48% yield. <sup>1</sup>H NMR (300 MHz, CDCl<sub>3</sub>):  $\delta$  (ppm) 7.58 (t,  $J = 5.8$  Hz, 1H, NHCOCH<sub>2</sub>), 7.03 (d,  $J = 7.5$  Hz, 1H, CONHCH), 4.58 – 4.47 (m, 1H, NHCH), 4.11 (t,  $J = 6.8$  Hz, 2H, COOCH<sub>2</sub>), 4.05 (t,  $J = 6.8$  Hz, 2H, COOCH<sub>2</sub>), 3.46 – 3.33 (m, 2H, (CH<sub>3</sub>CH<sub>2</sub>)<sub>2</sub>NCH<sub>2</sub>CH<sub>2</sub>CH<sub>2</sub>), 3.20 – 3.03 (m, 4H, (CH<sub>3</sub>CH<sub>2</sub>)<sub>2</sub>NCH<sub>2</sub>, 2H, (CH<sub>3</sub>CH<sub>2</sub>)<sub>2</sub>NCH<sub>2</sub>), 2.69 – 2.48 (m, 2H, CH<sub>2</sub>COO, 2H, NHCOCH<sub>2</sub>CH<sub>2</sub>), 2.47 – 2.32 (m, 2H, CH<sub>2</sub>CONH), 2.24 – 2.12 (m, 1H, NHCHCH<sub>2</sub>), 2.12 – 1.92 (m, 1H, NHCHCH<sub>2</sub>, 2H, (CH<sub>3</sub>CH<sub>2</sub>)<sub>2</sub>NCH<sub>2</sub>CH<sub>2</sub>), 1.70 – 1.54 (m, 4H, COOCH<sub>2</sub>CH<sub>2</sub>), 1.37 (t,  $J = 7.2$  Hz, 6H, CH<sub>2</sub>CH<sub>3</sub>), 1.33 – 1.23 (m, 44H, CH<sub>2</sub>(myristoyl)), 0.88 (t,  $J = 6.9$  Hz, 6H, CH<sub>2</sub>CH<sub>3</sub>(myristoyl)). <sup>13</sup>C NMR (75 MHz, CDCl<sub>3</sub>):  $\delta$  (ppm) 173.03 (1C, NHCOCH<sub>2</sub>), 172.83 (1C, CONHCH), 172.23 (1C, CH<sub>2</sub>COOCH<sub>2</sub>), 172.01 (1C, NHCHCO), 65.68 (1C, COOCH<sub>2</sub>), 64.88 (1C, COOCH<sub>2</sub>), 51.89 (1C, NHCH),

49.50 (1C, (CH<sub>3</sub>CH<sub>2</sub>)<sub>2</sub>NCH<sub>2</sub>), 46.70 (1C, (CH<sub>3</sub>CH<sub>2</sub>)<sub>2</sub>NCH<sub>2</sub>CH<sub>2</sub>CH<sub>2</sub>), 36.29 (2C, CH<sub>2</sub>CH<sub>3</sub>), 31.87 (2C, CH<sub>2</sub>CH<sub>2</sub>CH<sub>3</sub>), 31.34 (1C, CH<sub>2</sub>COOCH<sub>2</sub>), 30.35 (1C, COCH<sub>2</sub>CH<sub>2</sub>), 29.61 (8C, CH<sub>2</sub>(myristoyl)), 29.56 (2C, CH<sub>2</sub>(myristoyl)), 29.49 (1C, CH<sub>2</sub>(myristoyl)), 29.48 (1C, CH<sub>2</sub>(myristoyl)), 29.30 (2C, CH<sub>2</sub>(myristoyl), 1C, NHCHCH<sub>2</sub>), 29.24 (1C, CH<sub>2</sub>(myristoyl)), 29.19 (1C, CH<sub>2</sub>(myristoyl)), 28.57 (1C, OCH<sub>2</sub>CH<sub>2</sub>), 28.48 (1C, OCH<sub>2</sub>CH<sub>2</sub>), 27.22 (1C, COCH<sub>2</sub>CH<sub>2</sub>CO), 25.87 (1C, OCH<sub>2</sub>CH<sub>2</sub>CH<sub>2</sub>), 25.79 (1C, OCH<sub>2</sub>CH<sub>2</sub>CH<sub>2</sub>), 23.97 (1C, (CH<sub>3</sub>CH<sub>2</sub>)<sub>2</sub>NCH<sub>2</sub>CH<sub>2</sub>), 22.63 (2C, CH<sub>2</sub>(myristoyl)CH<sub>3</sub>), 14.05 (2C, CH<sub>2</sub>CH<sub>3</sub>(myristoyl)), 8.41 (2C, CH<sub>2</sub>CH<sub>3</sub>). HRMS, ESI<sup>+</sup>, m/z: Calcd for C<sub>44</sub>H<sub>86</sub>N<sub>3</sub>O<sub>6</sub> [M+H]<sup>+</sup>, 752.6517; found, 752.6537.

*1.3.5. ditetradecyl (4-oxo-4-((2-(pyrrolidin-1-yl)ethyl)amino)butanoyl)glutamate (TA5)*

DCM/methanol (40/1). White solid. 46% yield. <sup>1</sup>H NMR (500 MHz, CDCl<sub>3</sub>): δ (ppm) 7.75 (brs, 1H, NHCOCH<sub>2</sub>), 7.18 (d, *J* = 7.6 Hz, 1H, CONHCH), 4.57 – 4.51 (m, 1H, NHCH), 4.10 (t, *J* = 6.8 Hz, 2H, COOCH<sub>2</sub>), 4.05 (t, *J* = 6.7 Hz, 2H, COOCH<sub>2</sub>), 3.68 – 3.56 (m, 2H, (CH<sub>2</sub>CH<sub>2</sub>)<sub>2</sub>NCH<sub>2</sub>CH<sub>2</sub>), 3.24 (brs, 4H, (CH<sub>2</sub>CH<sub>2</sub>)<sub>2</sub>N), 3.20 – 3.13 (m, 2H, (CH<sub>2</sub>CH<sub>2</sub>)<sub>2</sub>NCH<sub>2</sub>), 2.73 – 2.62 (m, 2H, NHCOCH<sub>2</sub>), 2.62 – 2.54 (m, 2H, CH<sub>2</sub>COO), 2.48 – 2.34 (m, 2H, CH<sub>2</sub>CONH), 2.22 – 2.14 (m, 1H, NHCHCH<sub>2</sub>), 2.11 – 2.05 (m, 4H, CH<sub>2</sub>CH<sub>2</sub>NCH<sub>2</sub>CH<sub>2</sub>), 2.05 – 1.96 (m, 1H, NHCHCH<sub>2</sub>), 1.67 – 1.57 (m, 4H, COOCH<sub>2</sub>CH<sub>2</sub>), 1.32 – 1.25 (m, 44H, CH<sub>2</sub>(myristoyl)), 0.88 (t, *J* = 7.1 Hz, 6H, CH<sub>2</sub>CH<sub>3</sub>). <sup>13</sup>C NMR (125 MHz, CDCl<sub>3</sub>): δ (ppm) 172.86 (1C, NHCOCH<sub>2</sub>), 172.78 (1C, CONHCH), 172.27 (1C, CH<sub>2</sub>COOCH<sub>2</sub>), 172.16 (1C, NHCHCO), 65.65 (1C, COOCH<sub>2</sub>), 64.85 (1C, COOCH<sub>2</sub>), 55.20 (1C, (CH<sub>2</sub>CH<sub>2</sub>)<sub>2</sub>NCH<sub>2</sub>), 54.28 (2C, CH<sub>2</sub>CH<sub>2</sub>NCH<sub>2</sub>CH<sub>2</sub>), 51.87 (1C, NHCH), 36.13 (1C, (CH<sub>2</sub>CH<sub>2</sub>)<sub>2</sub>NCH<sub>2</sub>CH<sub>2</sub>), 31.86 (2C, CH<sub>2</sub>CH<sub>2</sub>CH<sub>3</sub>), 31.24 (1C, CH<sub>2</sub>COOCH<sub>2</sub>), 30.39 (1C, COCH<sub>2</sub>CH<sub>2</sub>CO), 29.64, 29.62, 29.60 (8C, CH<sub>2</sub>(myristoyl)), 29.55 (2C, CH<sub>2</sub>(myristoyl)), 29.49 (1C, CH<sub>2</sub>(myristoyl)), 29.46 (1C, CH<sub>2</sub>(myristoyl)), 29.30 (2C, CH<sub>2</sub>(myristoyl), 1C, NHCHCH<sub>2</sub>), 29.24 (1C, CH<sub>2</sub>(myristoyl)), 29.19 (1C, CH<sub>2</sub>(myristoyl)), 28.57 (1C, OCH<sub>2</sub>CH<sub>2</sub>), 28.48 (1C, OCH<sub>2</sub>CH<sub>2</sub>), 27.23 (1C, COCH<sub>2</sub>CH<sub>2</sub>CO), 25.87 (1C, OCH<sub>2</sub>CH<sub>2</sub>CH<sub>2</sub>), 25.80 (1C, OCH<sub>2</sub>CH<sub>2</sub>CH<sub>2</sub>), 23.27 (2C, (CH<sub>2</sub>CH<sub>2</sub>)<sub>2</sub>N), 22.62 (2C, CH<sub>2</sub>CH<sub>3</sub>), 14.03 (2C, CH<sub>2</sub>CH<sub>3</sub>). HRMS, ESI<sup>+</sup>, m/z: Calcd for C<sub>43</sub>H<sub>82</sub>N<sub>3</sub>O<sub>6</sub> [M+H]<sup>+</sup>, 736.6204; found, 736.6209.

1.3.6. *ditetradecyl (4-oxo-4-((3-(pyrrolidin-1-yl)propyl)amino)butanoyl)glutamate (TA6)*

DCM/methanol (20/1). Yellow-white solid. 35% yield.  $^1\text{H}$  NMR (500 MHz,  $\text{CDCl}_3$ ):  $\delta$  (ppm) 7.61 (brs, 1H,  $\text{NHCOCH}_2$ ), 7.16 (d,  $J = 7.3$  Hz, 1H,  $\text{CONHCH}$ ), 4.55 – 4.48 (m, 1H,  $\text{NHCH}$ ), 4.15 – 4.07 (m, 2H,  $\text{COOCH}_2$ ), 4.05 (t,  $J = 6.7$  Hz, 2H,  $\text{COOCH}_2$ ), 3.76 (brs, 2H,  $(\text{CH}_2\text{CH}_2)_2\text{NCH}_2\text{CH}_2\text{CH}_2$ ), 3.38 (d,  $J = 4.9$  Hz, 2H,  $\text{CH}_2\text{CH}_2\text{NCH}_2\text{CH}_2$ ), 3.20 (d,  $J = 5.6$  Hz, 2H,  $\text{CH}_2\text{CH}_2\text{NCH}_2\text{CH}_2$ ), 2.96 – 2.86 (m, 2H,  $(\text{CH}_2\text{CH}_2)_2\text{NCH}_2$ ), 2.64 – 2.54 (m, 2H,  $\text{NHCOCH}_2$ , 2H,  $\text{CH}_2\text{COO}$ ), 2.47 – 2.30 (m, 2H,  $\text{CH}_2\text{CONH}$ ), 2.23 – 2.12 (m, 1H,  $\text{NHCHCH}_2$ , 2H,  $(\text{CH}_2\text{CH}_2)_2\text{NCH}_2\text{CH}_2$ ), 2.12 – 1.96 (m, 1H,  $\text{NHCHCH}_2$ , 4H,  $\text{CH}_2\text{CH}_2\text{NCH}_2\text{CH}_2$ ), 1.67 – 1.57 (m, 4H,  $\text{COOCH}_2\text{CH}_2$ ), 1.32 – 1.25 (m, 44H,  $\text{CH}_2(\text{myristoyl})$ ), 0.88 (t,  $J = 7.0$  Hz, 6H,  $\text{CH}_2\text{CH}_3$ ).  $^{13}\text{C}$  NMR (125 MHz,  $\text{CDCl}_3$ ):  $\delta$  (ppm) 173.30 (1C,  $\text{NHCOCH}_2$ ), 172.85 (1C,  $\text{CONHCH}$ ), 172.64 (1C,  $\text{CH}_2\text{COOCH}_2$ ), 171.95 (1C,  $\text{NHCHCO}$ ), 65.73 (1C,  $\text{COOCH}_2$ ), 64.92 (1C,  $\text{COOCH}_2$ ), 53.77 (2C,  $(\text{CH}_2\text{CH}_2)_2\text{N}$ ), 52.88 (1C,  $(\text{CH}_2\text{CH}_2)_2\text{NCH}_2$ ), 51.94 (1C,  $\text{NHCH}$ ), 36.26 (1C,  $(\text{CH}_2\text{CH}_2)_2\text{NCH}_2\text{CH}_2\text{CH}_2$ ), 31.87 (2C,  $\text{CH}_2\text{CH}_2\text{CH}_3$ ), 31.33 (1C,  $\text{CH}_2\text{COOCH}_2$ ), 30.34 (1C,  $\text{COCH}_2\text{CH}_2\text{CO}$ ), 29.63, 29.61 (8C,  $\text{CH}_2(\text{myristoyl})$ ), 29.56 (2C,  $\text{CH}_2(\text{myristoyl})$ ), 29.50 (1C,  $\text{CH}_2(\text{myristoyl})$ ), 29.48 (1C,  $\text{CH}_2(\text{myristoyl})$ ), 29.30 (2C,  $\text{CH}_2(\text{myristoyl})$ , 1C,  $\text{NHCHCH}_2$ ), 29.25 (1C,  $\text{CH}_2(\text{myristoyl})$ ), 29.20 (1C,  $\text{CH}_2(\text{myristoyl})$ ), 28.57 (1C,  $\text{OCH}_2\text{CH}_2$ ), 28.48 (1C,  $\text{OCH}_2\text{CH}_2$ ), 27.18 (1C,  $\text{COCH}_2\text{CH}_2\text{CO}$ ), 25.87 (1C,  $\text{OCH}_2\text{CH}_2\text{CH}_2$ ), 25.80 (1C,  $\text{OCH}_2\text{CH}_2\text{CH}_2$ ), 25.65 (1C,  $(\text{CH}_2\text{CH}_2)_2\text{NCH}_2\text{CH}_2$ ), 23.25 (2C,  $(\text{CH}_2\text{CH}_2)_2\text{N}$ ), 22.62 (2C,  $\text{CH}_2\text{CH}_3$ ), 14.03 (2C,  $\text{CH}_2\text{CH}_3$ ). HRMS,  $\text{ESI}^+$ ,  $m/z$ : Calcd for  $\text{C}_{44}\text{H}_{84}\text{N}_3\text{O}_6$   $[\text{M}+\text{H}]^+$ , 750.6360; found, 750.6360.

1.3.7. *ditetradecyl (4-((2-(1-methylpyrrolidin-2-yl)ethyl)amino)-4-oxobutanoyl)glutamate (TA7)*

DCM/methanol (25/1). Milky-white solid. 37% yield.  $^1\text{H}$  NMR (300 MHz,  $\text{CDCl}_3$ ):  $\delta$  (ppm) 7.62 (brs, 1H,  $\text{NHCOCH}_2$ ), 7.35 (t,  $J = 8.7$  Hz, 1H,  $\text{CONHCH}$ ), 5.46 (brs, 6H,  $\text{CH}_2\text{N}(\text{CH}_3)\text{CH}$ ), 4.54 – 4.47 (m, 1H,  $\text{NHCH}$ ), 4.17 – 3.97 (m, 4H,  $\text{COOCH}_2$ ), 3.42 – 3.26 (m, 2H,  $\text{N}(\text{CH}_3)\text{CHCH}_2\text{CH}_2\text{NH}$ ), 3.08 – 2.92 (m, 2H,  $\text{N}(\text{CH}_3)\text{CHCH}_2\text{CH}_2\text{NH}$ ), 2.91 – 2.85 (m, 2H,  $\text{NHCOCH}_2$ ), 2.64 – 2.52 (m, 2H,  $\text{CH}_2\text{COO}$ , 1H,



$\text{N}(\text{CH}_3)\text{CHCH}_2\text{CH}_2$ ), 2.47 – 2.29 (m, 2H,  $\text{CH}_2\text{CONH}$ , 1H,  $\text{N}(\text{CH}_3)\text{CHCH}_2$ ), 2.17 – 1.97 (m, 2H,  $\text{NHCHCH}_2$ , 1H,  $\text{N}(\text{CH}_3)\text{CHCH}_2$ , 1H,  $\text{N}(\text{CH}_3)\text{CHCH}_2\text{CH}_2$ ), 1.69 – 1.53 (m, 4H,  $\text{COOCH}_2\text{CH}_2$ ), 1.37 – 1.19 (m, 44H,  $\text{CH}_2(\text{myristoyl})$ ), 0.88 (t,  $J = 7.0$  Hz, 6H,  $\text{CH}_2\text{CH}_3$ ).  $^{13}\text{C}$  NMR (75 MHz,  $\text{CDCl}_3$ ):  $\delta$  (ppm) 173.54 (1C,  $\text{NHCOCH}_2$ ), 173.00 (1C,  $\text{CONHCH}$ ), 172.42 (1C,  $\text{CH}_2\text{COOCH}_2$ ), 172.07 (1C,  $\text{NHCHCO}$ ), 71.26 (1C,  $\text{N}(\text{CH}_3)\text{CH}$ ), 67.42 (1C,  $\text{N}(\text{CH}_3)\text{CH}_2$ ), 65.84 (1C,  $\text{COOCH}_2$ ), 65.04 (1C,  $\text{COOCH}_2$ ), 56.16 (1C,  $\text{N}(\text{CH}_3)$ ), 51.96 (1C,  $\text{NHCH}$ ), 39.74 (1C,  $\text{N}(\text{CH}_3)\text{CHCH}_2\text{CH}_2\text{NH}$ ), 36.43 (1C,  $\text{N}(\text{CH}_3)\text{CHCH}_2\text{CH}_2\text{NH}$ ), 31.92 (2C,  $\text{CH}_2\text{CH}_2\text{CH}_3$ ), 31.28 (1C,  $\text{CH}_2\text{COOCH}_2$ ), 31.25 (1C,  $\text{N}(\text{CH}_3)\text{CHCH}_2\text{CH}_2\text{CH}_2$ ), 30.34 (1C,  $\text{COCH}_2\text{CH}_2$ ), 29.69 (8C,  $\text{CH}_2(\text{myristoyl})$ ), 29.66 (2C,  $\text{CH}_2(\text{myristoyl})$ ), 29.57 (1C,  $\text{CH}_2(\text{myristoyl})$ ), 29.55 (1C,  $\text{CH}_2(\text{myristoyl})$ ), 29.36 (2C,  $\text{CH}_2(\text{myristoyl})$ , 1C,  $\text{NHCHCH}_2$ ), 29.32 (1C,  $\text{CH}_2(\text{myristoyl})$ ), 29.29 (1C,  $\text{CH}_2(\text{myristoyl})$ ), 28.58 (1C,  $\text{OCH}_2\text{CH}_2$ ), 28.49 (1C,  $\text{OCH}_2\text{CH}_2$ ), 27.09 (1C,  $\text{COCH}_2\text{CH}_2\text{CO}$ ), 25.91 (1C,  $\text{OCH}_2\text{CH}_2\text{CH}_2$ ), 25.86 (1C,  $\text{OCH}_2\text{CH}_2\text{CH}_2$ ), 22.68 (2C,  $\text{CH}_2\text{CH}_3$ ), 21.60 (1C,  $\text{N}(\text{CH}_3)\text{CHCH}_2\text{CH}_2$ ), 14.10 (2C,  $\text{CH}_2\text{CH}_3$ ). HRMS,  $\text{ESI}^+$ ,  $m/z$ : Calcd for  $\text{C}_{44}\text{H}_{84}\text{N}_3\text{O}_6$   $[\text{M}+\text{H}]^+$ , 750.6360; found, 750.6367.

1.3.8. *ditetradecyl (4-((2-(4-methylpiperazin-1-yl)ethyl)amino)-4-oxobutanoyl) glutamate (TA8)*

DCM/methanol (15/1). White granular solid. 76% yield.  $^1\text{H}$  NMR (500 MHz,  $\text{CDCl}_3$ ):  $\delta$  (ppm) 7.70 (brs, 1H,  $\text{NHCOCH}_2$ ), 7.43 (brs, 1H,  $\text{CONHCH}$ ), 4.53 – 4.46 (m, 1H,  $\text{NHCH}$ ), 4.15 – 4.06 (m, 2H,  $\text{COOCH}_2$ ), 4.04 (t,  $J = 6.8$  Hz, 2H,  $\text{COOCH}_2$ ), 3.53 (m, 8H,  $\text{N}(\text{CH}_2\text{CH}_2)_2\text{NCH}_3$ , 2H,  $\text{NCH}_2\text{CH}_2\text{NH}$ ), 3.22 (brs, 2H,  $\text{NCH}_2\text{CH}_2\text{NH}$ ), 2.90 (brs, 3H,  $\text{NCH}_3$ ), 2.71 – 2.50 (m, 2H,  $\text{CH}_2\text{COO}$ , 2H,  $\text{COCH}_2\text{CH}_2\text{CO}$ ), 2.48 – 2.34 (m, 2H,  $\text{CH}_2\text{CONH}$ ), 2.19 – 2.09 (m, 1H,  $\text{NHCHCH}_2$ ), 2.06 – 1.96 (m, 1H,  $\text{NHCHCH}_2$ ), 1.67 – 1.57 (m, 4H,  $\text{COOCH}_2\text{CH}_2$ ), 1.31 – 1.25 (m, 44H,  $\text{CH}_2(\text{myristoyl})$ ), 0.88 (t,  $J = 7.1$  Hz, 6H,  $\text{CH}_2\text{CH}_3$ ).  $^{13}\text{C}$  NMR (125 MHz,  $\text{CDCl}_3$ ):  $\delta$  (ppm) 173.51 (1C,  $\text{NHCOCH}_2$ ), 172.82 (1C,  $\text{CONHCH}$ ), 172.78 (1C,  $\text{CH}_2\text{COOCH}_2$ ), 172.07 (1C,  $\text{NHCHCO}$ ), 65.71 (1C,  $\text{COOCH}_2$ ), 64.91 (1C,  $\text{COOCH}_2$ ), 56.27 (1C,  $\text{NCH}_2\text{CH}_2\text{NH}$ ), 51.96 (1C,  $\text{NHCH}$ ), 51.28 (2C,  $\text{N}(\text{CH}_2\text{CH}_2)_2\text{NCH}_3$ ), 49.56 (2C,  $\text{N}(\text{CH}_2\text{CH}_2)_2\text{NCH}_3$ ), 43.45 (1C,  $\text{NCH}_3$ ), 34.73 (1C,  $\text{NCH}_2\text{CH}_2\text{NH}$ ), 31.87 (2C,  $\text{CH}_2\text{CH}_2\text{CH}_3$ ), 31.13 (1C,  $\text{CH}_2\text{COOCH}_2$ ), 30.35 (1C,  $\text{COCH}_2\text{CH}_2\text{CO}$ ), 29.67 (2C,  $\text{CH}_2(\text{myristoyl})$ ), 29.65 (8C,

CH<sub>2</sub>(myristoyl)), 29.61 (2C, CH<sub>2</sub>(myristoyl)), 29.54 (2C, CH<sub>2</sub>(myristoyl), 1C, NHCHCH<sub>2</sub>), 29.30 (1C, CH<sub>2</sub>(myristoyl)), 29.28 (1C, CH<sub>2</sub>(myristoyl)), 28.58 (1C, OCH<sub>2</sub>CH<sub>2</sub>), 28.50 (1C, OCH<sub>2</sub>CH<sub>2</sub>), 27.06 (1C, COCH<sub>2</sub>CH<sub>2</sub>CO), 25.89 (1C, OCH<sub>2</sub>CH<sub>2</sub>CH<sub>2</sub>), 25.86 (1C, OCH<sub>2</sub>CH<sub>2</sub>CH<sub>2</sub>), 22.62 (2C, CH<sub>2</sub>CH<sub>3</sub>), 14.02 (2C, CH<sub>2</sub>CH<sub>3</sub>). HRMS, ESI<sup>+</sup>, m/z: Calcd for C<sub>44</sub>H<sub>85</sub>N<sub>4</sub>O<sub>6</sub> [M+H]<sup>+</sup>, 765.6469; found, 765.6464.

*1.3.9. ditetradecyl (4-((3-(4-methylpiperazin-1-yl)propyl)amino)-4-oxobutanoyl) glutamate (TA9)*

DCM/methanol (15/1). Milky white gel-like solid. 53% yield. <sup>1</sup>H NMR (500 MHz, CDCl<sub>3</sub>): δ (ppm) 7.63 (brs, 1H, NHCOCH<sub>2</sub>), 7.39 (brs, 1H, CONHCH), 4.51 – 4.45 (m, 1H, NHCH), 4.15 – 4.06 (m, 2H, COOCH<sub>2</sub>), 4.04 (t, *J* = 7.0 Hz, 2H, COOCH<sub>2</sub>), 3.55 (brs, 8H, N(CH<sub>2</sub>CH<sub>2</sub>)<sub>2</sub>NCH<sub>3</sub>), 3.33 (brs, 2H, NCH<sub>2</sub>CH<sub>2</sub>CH<sub>2</sub>NH), 3.18 (brs, 2H, NCH<sub>2</sub>CH<sub>2</sub>CH<sub>2</sub>NH), 2.89 (s, 3H, NCH<sub>3</sub>), 2.66 – 2.49 (m, 2H, CH<sub>2</sub>COO, 2H, COCH<sub>2</sub>CH<sub>2</sub>CO), 2.47 – 2.34 (m, 2H, CH<sub>2</sub>CONH), 2.19 – 2.09 (m, 1H, NHCHCH<sub>2</sub>), 2.06 – 1.95 (m, 1H, NHCHCH<sub>2</sub>, 2H, NCH<sub>2</sub>CH<sub>2</sub>CH<sub>2</sub>NH), 1.65 – 1.57 (m, 4H, COOCH<sub>2</sub>CH<sub>2</sub>), 1.30 – 1.25 (m, 44H, CH<sub>2</sub>(myristoyl)), 0.88 (t, *J* = 6.7 Hz, 6H, CH<sub>2</sub>CH<sub>3</sub>). <sup>13</sup>C NMR (125 MHz, CDCl<sub>3</sub>): δ (ppm) 173.29 (1C, NHCOCH<sub>2</sub>), 172.83 (1C, CONHCH), 172.71 (1C, CH<sub>2</sub>COOCH<sub>2</sub>), 172.08 (1C, NHCHCO), 65.72 (1C, COOCH<sub>2</sub>), 64.93 (1C, COOCH<sub>2</sub>), 54.66 (1C, NCH<sub>2</sub>CH<sub>2</sub>CH<sub>2</sub>NH), 51.95 (1C, NHCH), 50.94 (2C, N(CH<sub>2</sub>CH<sub>2</sub>)<sub>2</sub>NCH<sub>3</sub>), 49.38 (2C, N(CH<sub>2</sub>CH<sub>2</sub>)<sub>2</sub>NCH<sub>3</sub>), 43.52 (1C, NCH<sub>3</sub>), 36.66 (1C, NCH<sub>2</sub>CH<sub>2</sub>CH<sub>2</sub>NH), 31.88 (2C, CH<sub>2</sub>CH<sub>2</sub>CH<sub>3</sub>), 31.22 (1C, CH<sub>2</sub>COOCH<sub>2</sub>), 30.38 (1C, COCH<sub>2</sub>CH<sub>2</sub>CO), 29.68 (2C, CH<sub>2</sub>(myristoyl)), 29.67 (8C, CH<sub>2</sub>(myristoyl)), 29.30 (2C, CH<sub>2</sub>(myristoyl)), 29.25 (2C, CH<sub>2</sub>(myristoyl), 1C, NHCHCH<sub>2</sub>), 29.21 (2C, CH<sub>2</sub>(myristoyl)), 28.58 (1C, OCH<sub>2</sub>CH<sub>2</sub>), 28.48 (1C, OCH<sub>2</sub>CH<sub>2</sub>), 27.25 (1C, COCH<sub>2</sub>CH<sub>2</sub>CO), 25.91 (1C, OCH<sub>2</sub>CH<sub>2</sub>CH<sub>2</sub>), 25.87 (1C, OCH<sub>2</sub>CH<sub>2</sub>CH<sub>2</sub>), 24.20 (1C, NCH<sub>2</sub>CH<sub>2</sub>CH<sub>2</sub>NH), 22.63 (2C, CH<sub>2</sub>CH<sub>3</sub>), 14.03 (2C, CH<sub>2</sub>CH<sub>3</sub>). HRMS, ESI<sup>+</sup>, m/z: Calcd for C<sub>45</sub>H<sub>87</sub>N<sub>4</sub>O<sub>6</sub> [M+H]<sup>+</sup>, 779.6626; found, 779.6631.

*1.3.10. ditetradecyl (4-((3-(bis(2-hydroxyethyl)amino)propyl)amino)-4-oxobutanoyl) glutamate (TA10)*

DCM/methanol (10/1). White granular solid. 51% yield. <sup>1</sup>H NMR (300 MHz, CDCl<sub>3</sub>): δ (ppm) 7.85 (brs, 1H, NHCOCH<sub>2</sub>), 7.60 (d, *J* = 7.1 Hz, 1H, CONHCH),

4.78 (brs, 6H, (HOCH<sub>2</sub>CH<sub>2</sub>)<sub>2</sub>NCH<sub>2</sub>CH<sub>2</sub>CH<sub>2</sub>), 4.51 – 4.44 (m, 1H, NHCH), 4.09 – 3.97 (m, 4H, COOCH<sub>2</sub>, 2H, (HOCH<sub>2</sub>CH<sub>2</sub>)<sub>2</sub>N), 3.52 – 3.35 (m, 6H, (HOCH<sub>2</sub>CH<sub>2</sub>)<sub>2</sub>NCH<sub>2</sub>CH<sub>2</sub>CH<sub>2</sub>), 2.68 – 2.50 (m, 2H, NHCOCH<sub>2</sub>, 2H, CH<sub>2</sub>COO), 2.46 – 2.35 (m, 2H, CH<sub>2</sub>CONH), 2.19 – 1.95 (m, 2H, NHCHCH<sub>2</sub>, 2H, (HOCH<sub>2</sub>CH<sub>2</sub>)<sub>2</sub>NCH<sub>2</sub>CH<sub>2</sub>CH<sub>2</sub>), 1.67 – 1.56 (m, 4H, COOCH<sub>2</sub>CH<sub>2</sub>), 1.34 – 1.22 (m, 44H, CH<sub>2</sub>(myristoyl)), 0.88 (t, *J* = 6.9 Hz, 6H, CH<sub>2</sub>CH<sub>3</sub>). <sup>13</sup>C NMR (75 MHz, CDCl<sub>3</sub>): δ (ppm) 173.87 (1C, NHCOCH<sub>2</sub>), 173.05 (1C, CONHCH), 172.90 (1C, CH<sub>2</sub>COOCH<sub>2</sub>), 172.14 (1C, NHCHCO), 65.73 (1C, COOCH<sub>2</sub>), 64.95 (1C, COOCH<sub>2</sub>), 55.91 (2C, (HOCH<sub>2</sub>CH<sub>2</sub>)<sub>2</sub>N), 55.65 (2C, (HOCH<sub>2</sub>CH<sub>2</sub>)<sub>2</sub>N), 52.14 (1C, (HOCH<sub>2</sub>CH<sub>2</sub>)<sub>2</sub>NCH<sub>2</sub>), 51.96 (1C, NHCH), 36.33 (1C, (HOCH<sub>2</sub>CH<sub>2</sub>)<sub>2</sub>NCH<sub>2</sub>CH<sub>2</sub>CH<sub>2</sub>), 31.89 (2C, CH<sub>2</sub>CH<sub>2</sub>CH<sub>3</sub>), 31.20 (1C, CH<sub>2</sub>COOCH<sub>2</sub>), 30.39 (1C, COCH<sub>2</sub>CH<sub>2</sub>CO), 29.68 (8C, CH<sub>2</sub>(myristoyl)), 29.64 (2C, CH<sub>2</sub>(myristoyl)), 29.57 (2C, CH<sub>2</sub>(myristoyl)), 29.33 (4C, CH<sub>2</sub>(myristoyl)), 1C, NHCHCH<sub>2</sub>), 28.59 (1C, OCH<sub>2</sub>CH<sub>2</sub>), 28.51 (1C, OCH<sub>2</sub>CH<sub>2</sub>), 27.00 (1C, COCH<sub>2</sub>CH<sub>2</sub>CO), 25.90 (1C, OCH<sub>2</sub>CH<sub>2</sub>CH<sub>2</sub>), 25.89 (1C, OCH<sub>2</sub>CH<sub>2</sub>CH<sub>2</sub>), 23.87 (1C, (HOCH<sub>2</sub>CH<sub>2</sub>)<sub>2</sub>NCH<sub>2</sub>CH<sub>2</sub>), 22.64 (2C, CH<sub>2</sub>CH<sub>3</sub>), 14.04 (2C, CH<sub>2</sub>CH<sub>3</sub>). HRMS, ESI<sup>+</sup>, *m/z*: Calcd for C<sub>44</sub>H<sub>86</sub>N<sub>3</sub>O<sub>8</sub> [M+H]<sup>+</sup>, 784.6415; found, 784.6407.

*1.3.11. ditetradecyl (4-((3-(1H-imidazol-1-yl)propyl)amino)-4-oxobutanoyl)glutamate (TAII)*

DCM/methanol (10/1). White gel-like solid. 59% yield. <sup>1</sup>H NMR (300 MHz, CDCl<sub>3</sub>): δ (ppm) 8.02 (brs, 1H, Imidazole), 7.27 (brs, 2H, Imidazole), 4.66 – 4.47 (m, 1H, NHCH), 4.32 – 3.94 (m, 4H, COOCH<sub>2</sub>, 2H, NCH<sub>2</sub>), 3.23 (brs, 2H, NCH<sub>2</sub>CH<sub>2</sub>CH<sub>2</sub>), 2.64 (brs, 2H, NCH<sub>2</sub>CH<sub>2</sub>, 2H, COCH<sub>2</sub>CH<sub>2</sub>CO), 2.44 (brs, 1H, NHCHCH<sub>2</sub>, 2H, CH<sub>2</sub>COO), 2.17 – 1.98 (m, 1H, NHCHCH<sub>2</sub>, 2H, CH<sub>2</sub>CONH), 1.65 – 1.55 (m, 4H, COOCH<sub>2</sub>CH<sub>2</sub>), 1.32 – 1.24 (m, 44H, CH<sub>2</sub>(myristoyl)), 0.88 (t, *J* = 6.9 Hz, 6H, CH<sub>2</sub>CH<sub>3</sub>). <sup>13</sup>C NMR (125 MHz, CDCl<sub>3</sub>): δ (ppm) 173.72 (1C, NHCOCH<sub>2</sub>), 173.67 (1C, CONHCH), 173.04 (1C, CH<sub>2</sub>COOCH<sub>2</sub>), 172.45 (1C, NHCHCO), 139.22 (1C, Imidazole), 138.81 (1C, Imidazole), 114.01 (1C, Imidazole), 66.06 (1C, COOCH<sub>2</sub>), 65.03 (1C, COOCH<sub>2</sub>), 52.10 (1C, NHCH), 48.69 (1C, NCH<sub>2</sub>CH<sub>2</sub>CH<sub>2</sub>NH), 33.77 (1C, NCH<sub>2</sub>CH<sub>2</sub>CH<sub>2</sub>NH), 31.90 (2C, CH<sub>2</sub>CH<sub>2</sub>CH<sub>3</sub>), 31.60 (1C, CH<sub>2</sub>COOCH<sub>2</sub>), 30.46 (1C, COCH<sub>2</sub>CH<sub>2</sub>CO), 29.72 (6C, CH<sub>2</sub>(myristoyl)), 29.70 (2C, CH<sub>2</sub>(myristoyl)), 29.66

(2C, CH<sub>2</sub>(myristoyl)), 29.65 (2C, CH<sub>2</sub>(myristoyl)), 29.59 (2C, CH<sub>2</sub>(myristoyl), 1C, NHCHCH<sub>2</sub>), 29.35 (1C, CH<sub>2</sub>(myristoyl)), 29.34 (1C, CH<sub>2</sub>(myristoyl)), 28.92 (1C, COCH<sub>2</sub>CH<sub>2</sub>CO), 28.60 (1C, OCH<sub>2</sub>CH<sub>2</sub>), 28.50 (1C, OCH<sub>2</sub>CH<sub>2</sub>), 26.84 (1C, NCH<sub>2</sub>CH<sub>2</sub>CH<sub>2</sub>NH), 25.93 (1C, OCH<sub>2</sub>CH<sub>2</sub>CH<sub>2</sub>), 25.91 (1C, OCH<sub>2</sub>CH<sub>2</sub>CH<sub>2</sub>), 22.65 (2C, CH<sub>2</sub>CH<sub>3</sub>), 14.04 (2C, CH<sub>2</sub>CH<sub>3</sub>). HRMS, ESI<sup>+</sup>, m/z: Calcd for C<sub>43</sub>H<sub>79</sub>N<sub>4</sub>O<sub>6</sub> [M+H]<sup>+</sup>, 747.6000; found, 747.6002.

1.3.12. *ditetradecyl (4-((1-methylpiperidin-4-yl)amino)-4-oxobutanoyl)glutamate (TAI2)*

DCM/methanol (20/1). White gel-like solid. 38 % yield. <sup>1</sup>H NMR (500 MHz, CDCl<sub>3</sub>): δ (ppm) 7.01 (brs, 1H, CONHCH), 4.57 – 4.51 (m, 1H, NHCH), 4.15 – 4.08 (m, 2H, COOCH<sub>2</sub>), 4.05 (t, *J* = 6.8 Hz, 2H, COOCH<sub>2</sub>), 3.93 (brs, 1H, CH<sub>3</sub>N(CH<sub>2</sub>CH<sub>2</sub>)<sub>2</sub>CH), 3.28 – 3.19 (m, 2H, CH<sub>3</sub>N(CH<sub>2</sub>CH<sub>2</sub>)<sub>2</sub>CH), 2.73 – 2.64 (m, 2H, CH<sub>3</sub>N(CH<sub>2</sub>CH<sub>2</sub>)<sub>2</sub>CH), 2.61 (s, 3H, NCH<sub>3</sub>), 2.59 – 2.52 (m, 2H, COCH<sub>2</sub>CH<sub>2</sub>CO, 2H, CH<sub>2</sub>COO), 2.45 – 2.32 (m, 2H, CH<sub>2</sub>CONH), 2.21 – 2.12 (m, 1H, NHCHCH<sub>2</sub>), 2.11 – 2.04 (m, 2H, CH<sub>3</sub>N(CH<sub>2</sub>CH<sub>2</sub>)<sub>2</sub>CH), 2.03 – 1.95 (m, 1H, NHCHCH<sub>2</sub>), 1.94 – 1.85 (m, 2H, CH<sub>3</sub>N(CH<sub>2</sub>CH<sub>2</sub>)<sub>2</sub>CH), 1.67 – 1.57 (m, 4H, COOCH<sub>2</sub>CH<sub>2</sub>), 1.32 – 1.25 (m, 44H, CH<sub>2</sub>(myristoyl)), 0.88 (t, *J* = 6.8 Hz, 6H, CH<sub>2</sub>CH<sub>3</sub>). <sup>13</sup>C NMR (125 MHz, CDCl<sub>3</sub>): δ (ppm) 172.81 (1C, NHCOCH<sub>2</sub>), 172.28 (1C, CONHCH), 171.91 (1C, NHCHCO, 1C, CH<sub>2</sub>COOCH<sub>2</sub>), 65.74 (1C, COOCH<sub>2</sub>), 64.92 (1C, COOCH<sub>2</sub>), 53.60 (2C, CH<sub>3</sub>N(CH<sub>2</sub>CH<sub>2</sub>)<sub>2</sub>CH), 51.84 (1C, NHCH), 44.43 (1C, NCH<sub>3</sub>, 1C, CH<sub>3</sub>N(CH<sub>2</sub>CH<sub>2</sub>)<sub>2</sub>CH), 31.87 (2C, CH<sub>2</sub>CH<sub>2</sub>CH<sub>3</sub>), 31.50 (1C, CH<sub>2</sub>COOCH<sub>2</sub>), 30.34 (1C, COCH<sub>2</sub>CH<sub>2</sub>CO), 29.81 (2C, CH<sub>3</sub>N(CH<sub>2</sub>CH<sub>2</sub>)<sub>2</sub>CH), 29.64, 29.62 (8C, CH<sub>2</sub>(myristoyl)), 29.57 (2C, CH<sub>2</sub>(myristoyl)), 29.51 (1C, CH<sub>2</sub>(myristoyl)), 29.48 (1C, CH<sub>2</sub>(myristoyl)), 29.30 (2C, CH<sub>2</sub>(myristoyl), 1C, NHCHCH<sub>2</sub>), 29.25 (1C, CH<sub>2</sub>(myristoyl)), 29.21 (1C, CH<sub>2</sub>(myristoyl)), 28.56 (1C, OCH<sub>2</sub>CH<sub>2</sub>), 28.47 (1C, OCH<sub>2</sub>CH<sub>2</sub>), 27.37 (1C, COCH<sub>2</sub>CH<sub>2</sub>CO), 25.87 (1C, OCH<sub>2</sub>CH<sub>2</sub>CH<sub>2</sub>), 25.80 (1C, OCH<sub>2</sub>CH<sub>2</sub>CH<sub>2</sub>), 22.62 (2C, CH<sub>2</sub>CH<sub>3</sub>), 14.03 (2C, CH<sub>2</sub>CH<sub>3</sub>). HRMS, ESI<sup>+</sup>, m/z: Calcd for C<sub>43</sub>H<sub>82</sub>N<sub>3</sub>O<sub>6</sub> [M+H]<sup>+</sup>, 736.6204; found, 736.6199.

1.3.13. *ditetradecyl (4-((1-methylpyrrolidin-3-yl)amino)-4-oxobutanoyl)glutamate (TAI3)*

DCM/methanol (25/1). White gel-like solid. 34% yield.  $^1\text{H}$  NMR (300 MHz,  $\text{CDCl}_3$ ):  $\delta$  (ppm) 8.08 (t,  $J = 7.3$  Hz, 1H,  $\text{NHCOCH}_2$ ), 7.35 (d,  $J = 8.3$  Hz, 1H,  $\text{CONHCH}$ ), 4.82 (brs, 1H,  $\text{CH}_3\text{N}(\text{CH}_2\text{CH}_2)(\text{CH}_2)\text{CH}$ ), 4.59 – 4.50 (m, 1H,  $\text{NHCH}$ ), 4.11 – 4.02 (m, 4H,  $\text{COOCH}_2$ ), 3.89 – 3.61 (m, 2H,  $\text{CH}_3\text{N}(\text{CH}_2\text{CH}_2)(\text{CH}_2)\text{CH}$ ), 3.30 – 3.04 (m, 2H,  $\text{CH}_3\text{N}(\text{CH}_2\text{CH}_2)(\text{CH}_2)\text{CH}$ ), 2.94 (s, 3H,  $\text{NCH}_3$ ), 2.66 – 2.53 (m, 2H,  $\text{COCH}_2\text{CH}_2\text{CO}$ , 2H,  $\text{CH}_2\text{COO}$ ), 2.47 – 2.36 (m, 2H,  $\text{CH}_2\text{CONH}$ ), 2.36 – 2.09 (m, 1H,  $\text{NHCHCH}_2$ , 2H,  $\text{CH}_3\text{N}(\text{CH}_2\text{CH}_2)(\text{CH}_2)\text{CH}$ ), 2.07 – 1.95 (m, 1H,  $\text{NHCHCH}_2$ ), 1.66 – 1.57 (m, 4H,  $\text{COOCH}_2\text{CH}_2$ ), 1.33 – 1.24 (m, 44H,  $\text{CH}_2(\text{myristoyl})$ ), 0.88 (t,  $J = 6.9$  Hz, 6H,  $\text{CH}_2\text{CH}_3$ ).  $^{13}\text{C}$  NMR (125 MHz,  $\text{CDCl}_3$ ):  $\delta$  (ppm) 172.80 (1C,  $\text{NHCOCH}_2$ ), 172.75 (1C,  $\text{CONHCH}$ ), 172.27 (1C,  $\text{CH}_2\text{COOCH}_2$ ), 172.17 (1C,  $\text{NHCHCO}$ ), 65.95 (1C,  $\text{CH}_3\text{N}(\text{CH}_2\text{CH}_2)(\text{CH}_2)\text{CH}$ ), 65.86 (1C,  $\text{COOCH}_2$ ), 64.99 (1C,  $\text{CH}_3\text{N}(\text{CH}_2\text{CH}_2)(\text{CH}_2)\text{CH}$ ), 64.97 (1C,  $\text{COOCH}_2$ ), 56.32 (1C,  $\text{CH}_3\text{N}$ ), 51.94 (1C,  $\text{CH}_3\text{N}(\text{CH}_2\text{CH}_2)(\text{CH}_2)\text{CH}$ ), 51.80 (1C,  $\text{NHCH}$ ), 48.89 (1C,  $\text{CH}_3\text{N}(\text{CH}_2\text{CH}_2)(\text{CH}_2)\text{CH}$ ), 31.88 (2C,  $\text{CH}_2\text{CH}_2\text{CH}_3$ ), 31.38 (1C,  $\text{CH}_2\text{COOCH}_2$ ), 30.62 (1C,  $\text{COCH}_2\text{CH}_2\text{CO}$ ), 29.65 (8C,  $\text{CH}_2(\text{myristoyl})$ ), 29.61 (2C,  $\text{CH}_2(\text{myristoyl})$ ), 29.58 (1C,  $\text{CH}_2(\text{myristoyl})$ ), 29.52 (1C,  $\text{CH}_2(\text{myristoyl})$ ), 29.31 (2C,  $\text{CH}_2(\text{myristoyl})$ , 1C,  $\text{NHCHCH}_2$ ), 29.28 (1C,  $\text{CH}_2(\text{myristoyl})$ ), 29.26 (1C,  $\text{CH}_2(\text{myristoyl})$ ), 28.63 (1C,  $\text{OCH}_2\text{CH}_2$ ), 28.56 (1C,  $\text{OCH}_2\text{CH}_2$ ), 27.50 (1C,  $\text{COCH}_2\text{CH}_2\text{CO}$ ), 25.91 (1C,  $\text{OCH}_2\text{CH}_2\text{CH}_2$ ), 25.87 (1C,  $\text{OCH}_2\text{CH}_2\text{CH}_2$ ), 22.64 (2C,  $\text{CH}_2\text{CH}_3$ ), 14.05 (2C,  $\text{CH}_2\text{CH}_3$ ). HRMS,  $\text{ESI}^+$ ,  $m/z$ : Calcd for  $\text{C}_{42}\text{H}_{80}\text{N}_3\text{O}_6$   $[\text{M}+\text{H}]^+$ , 722.6047; found, 722.6062.

#### 1.3.14. ditetradecyl (4-((2-morpholinoethyl)amino)-4-oxobutanoyl)glutamate (**TA14**)

DCM/methanol (25/1). White gel-like solid. 51% yield.  $^1\text{H}$  NMR (500 MHz,  $\text{CDCl}_3$ ):  $\delta$  (ppm) 8.12 (brs, 1H,  $\text{NHCOCH}_2$ ), 7.32 (d,  $J = 3.7$  Hz, 1H,  $\text{CONHCH}$ ), 4.54 – 4.47 (m, 1H,  $\text{NHCH}$ ), 4.17 – 3.97 (m, 4H,  $\text{COOCH}_2$ , 4H,  $\text{O}(\text{CH}_2\text{CH}_2)_2\text{N}$ ), 3.70 (brs, 4H,  $\text{O}(\text{CH}_2\text{CH}_2)_2\text{N}$ ), 3.34 (brs, 2H,  $\text{NCH}_2\text{CH}_2\text{NH}$ ), 3.04 (brs, 2H,  $\text{NCH}_2\text{CH}_2\text{NH}$ ), 2.72 – 2.56 (m, 2H,  $\text{COCH}_2\text{CH}_2\text{CO}$ , 2H,  $\text{CH}_2\text{COO}$ ), 2.48 – 2.35 (m, 2H,  $\text{CH}_2\text{CONH}$ ), 2.19 – 2.11 (m, 1H,  $\text{NHCHCH}_2$ ), 2.06 – 1.96 (m, 1H,  $\text{NHCHCH}_2$ ), 1.66 – 1.59 (m, 4H,  $\text{COOCH}_2\text{CH}_2$ ), 1.31 – 1.25 (m, 44H,  $\text{CH}_2(\text{myristoyl})$ ), 0.88 (t,  $J = 7.0$  Hz, 6H,  $\text{CH}_2\text{CH}_3$ ).  $^{13}\text{C}$  NMR (125 MHz,  $\text{CDCl}_3$ ):  $\delta$  (ppm) 176.27 (1C,  $\text{NHCOCH}_2$ ), 173.08 (1C,  $\text{CONHCH}$ ), 171.92 (1C,  $\text{CH}_2\text{COOCH}_2$ ), 172.09 (1C,  $\text{NHCHCO}$ ), 65.80 (1C,

COOCH<sub>2</sub>), 64.98 (1C, COOCH<sub>2</sub>), 63.69 (2C, O(CH<sub>2</sub>CH<sub>2</sub>)<sub>2</sub>N), 57.49 (1C, NCH<sub>2</sub>CH<sub>2</sub>NH), 52.67 (1C, O(CH<sub>2</sub>CH<sub>2</sub>)<sub>2</sub>N), 52.59 (1C, O(CH<sub>2</sub>CH<sub>2</sub>)<sub>2</sub>N), 52.01 (1C, NHCH), 33.73 (1C, NCH<sub>2</sub>CH<sub>2</sub>NH), 31.88 (2C, CH<sub>2</sub>CH<sub>2</sub>CH<sub>3</sub>), 31.10 (1C, CH<sub>2</sub>COOCH<sub>2</sub>), 30.34 (1C, COCH<sub>2</sub>CH<sub>2</sub>CO), 29.65, 29.64, 29.62(8C, CH<sub>2</sub>(myristoyl)), 29.59 (2C, CH<sub>2</sub>(myristoyl)), 29.52 (1C, CH<sub>2</sub>(myristoyl)), 29.50 (1C, CH<sub>2</sub>(myristoyl)), 29.31 (2C, CH<sub>2</sub>(myristoyl), 1C, NHCHCH<sub>2</sub>), 29.27 (1C, CH<sub>2</sub>(myristoyl)), 29.24 (1C, CH<sub>2</sub>(myristoyl)), 28.57 (1C, OCH<sub>2</sub>CH<sub>2</sub>), 28.48 (1C, OCH<sub>2</sub>CH<sub>2</sub>), 27.07 (1C, COCH<sub>2</sub>CH<sub>2</sub>CO), 25.88 (1C, OCH<sub>2</sub>CH<sub>2</sub>CH<sub>2</sub>), 25.82 (1C, OCH<sub>2</sub>CH<sub>2</sub>CH<sub>2</sub>), 22.63 (2C, CH<sub>2</sub>CH<sub>3</sub>), 14.04 (2C, CH<sub>2</sub>CH<sub>3</sub>). HRMS, ESI<sup>+</sup>, m/z: Calcd for C<sub>43</sub>H<sub>82</sub>N<sub>3</sub>O<sub>7</sub> [M+H]<sup>+</sup>, 752.6153; found, 752.6149.

*1.3.15. ditetradecyl (4-((3-morpholinopropyl)amino)-4-oxobutanoyl)glutamate (TA15)*

DCM/methanol (25/1). White gel-like solid. 46% yield. <sup>1</sup>H NMR (500 MHz, CDCl<sub>3</sub>): δ (ppm) 7.70 (brs, 1H, NHCOCH<sub>2</sub>), 7.19 (brs, 1H, CONHCH), 4.52 – 4.47 (m, 1H, NHCH), 4.20 – 3.98 (m, 4H, COOCH<sub>2</sub>, 4H, O(CH<sub>2</sub>CH<sub>2</sub>)<sub>2</sub>N), 3.53 (brs, 2H, O(CH<sub>2</sub>CH<sub>2</sub>)<sub>2</sub>N), 3.37 (brs, 2H, NCH<sub>2</sub>CH<sub>2</sub>CH<sub>2</sub>NH), 3.18 (brs, 2H, NCH<sub>2</sub>CH<sub>2</sub>CH<sub>2</sub>NH), 2.96 (brs, 2H, O(CH<sub>2</sub>CH<sub>2</sub>)<sub>2</sub>N), 2.63 – 2.58 (m, 2H, COCH<sub>2</sub>CH<sub>2</sub>CO), 2.57 (brs, 2H, CH<sub>2</sub>COO), 2.47 – 2.33 (m, 2H, CH<sub>2</sub>CONH), 2.19 – 2.12 (m, 1H, NHCHCH<sub>2</sub>), 2.09 (brs, 2H, NCH<sub>2</sub>CH<sub>2</sub>CH<sub>2</sub>NH), 2.04 – 1.96 (m, 1H, NHCHCH<sub>2</sub>), 1.66 – 1.59 (m, 4H, COOCH<sub>2</sub>CH<sub>2</sub>), 1.31 – 1.25 (m, 44H, CH<sub>2</sub>(myristoyl)), 0.88 (t, *J* = 7.0 Hz, 6H, CH<sub>2</sub>CH<sub>3</sub>). <sup>13</sup>C NMR (125 MHz, CDCl<sub>3</sub>): δ (ppm) 173.41 (1C, NHCOCH<sub>2</sub>), 172.85 (1C, CONHCH), 172.63 (1C, CH<sub>2</sub>COOCH<sub>2</sub>), 172.01 (1C, NHCHCO), 65.74 (1C, COOCH<sub>2</sub>), 64.94 (1C, COOCH<sub>2</sub>), 63.74 (2C, O(CH<sub>2</sub>CH<sub>2</sub>)<sub>2</sub>N), 55.17 (1C, NCH<sub>2</sub>CH<sub>2</sub>CH<sub>2</sub>NH), 52.03 (2C, O(CH<sub>2</sub>CH<sub>2</sub>)<sub>2</sub>N), 51.94 (1C, NHCH), 36.24 (1C, NCH<sub>2</sub>CH<sub>2</sub>CH<sub>2</sub>NH), 31.87 (2C, CH<sub>2</sub>CH<sub>2</sub>CH<sub>3</sub>), 31.16 (1C, CH<sub>2</sub>COOCH<sub>2</sub>), 30.33 (1C, COCH<sub>2</sub>CH<sub>2</sub>CO), 29.64, 29.62, 29.60(8C, CH<sub>2</sub>(myristoyl)), 29.57 (2C, CH<sub>2</sub>(myristoyl)), 29.51 (1C, CH<sub>2</sub>(myristoyl)), 29.49 (1C, CH<sub>2</sub>(myristoyl)), 29.30 (2C, CH<sub>2</sub>(myristoyl), 1C, NHCHCH<sub>2</sub>), 29.26 (1C, CH<sub>2</sub>(myristoyl)), 29.22 (1C, CH<sub>2</sub>(myristoyl)), 28.57 (1C, OCH<sub>2</sub>CH<sub>2</sub>), 28.48 (1C, OCH<sub>2</sub>CH<sub>2</sub>), 27.14 (1C, COCH<sub>2</sub>CH<sub>2</sub>CO), 25.87 (1C, OCH<sub>2</sub>CH<sub>2</sub>CH<sub>2</sub>), 25.81 (1C, OCH<sub>2</sub>CH<sub>2</sub>CH<sub>2</sub>), 23.46 (1C, NCH<sub>2</sub>CH<sub>2</sub>CH<sub>2</sub>NH), 22.62 (2C, CH<sub>2</sub>CH<sub>3</sub>), 14.03 (2C, CH<sub>2</sub>CH<sub>3</sub>). HRMS, ESI<sup>+</sup>, m/z: Calcd for C<sub>44</sub>H<sub>84</sub>N<sub>3</sub>O<sub>7</sub> [M+H]<sup>+</sup>, 766.6309; found,

766.6308.

1.3.16. *ditetradecyl (4-oxo-4-((2-(piperidin-1-yl)ethyl)amino)butanoyl)glutamate (TA16)*

DCM/methanol (10/1). White gel-like solid. 52% yield. <sup>1</sup>H NMR (500 MHz, CDCl<sub>3</sub>): δ (ppm) 6.78 (d, *J* = 7.7 Hz, 1H, CONHCH), 6.59 (brs, 1H, NHCOCH<sub>2</sub>), 4.60 – 4.54 (m, 1H, NHCH), 4.11 (t, *J* = 6.7 Hz, 2H, COOCH<sub>2</sub>), 4.05 (t, *J* = 6.7 Hz, 2H, COOCH<sub>2</sub>), 3.42 – 3.33 (m, 2H, NCH<sub>2</sub>CH<sub>2</sub>NH), 2.64 – 2.45 (m, 2H, COCH<sub>2</sub>CH<sub>2</sub>CO, 2H, CH<sub>2</sub>COO, 6H, CH<sub>2</sub>(CH<sub>2</sub>CH<sub>2</sub>)<sub>2</sub>NCH<sub>2</sub>), 2.43 – 2.32 (m, 2H, CH<sub>2</sub>CONH), 2.23 – 2.15 (m, 1H, NHCHCH<sub>2</sub>), 2.03 – 1.94 (m, 1H, NHCHCH<sub>2</sub>), 1.66 – 1.57 (m, 4H, COOCH<sub>2</sub>CH<sub>2</sub>, 4H, CH<sub>2</sub>(CH<sub>2</sub>CH<sub>2</sub>)<sub>2</sub>N), 1.50 – 1.43 (m, 2H, CH<sub>2</sub>(CH<sub>2</sub>CH<sub>2</sub>)<sub>2</sub>N), 1.31 – 1.24 (m, 44H, CH<sub>2</sub>(myristoyl)), 0.88 (t, *J* = 7.1 Hz, 6H, CH<sub>2</sub>CH<sub>3</sub>). <sup>13</sup>C NMR (125 MHz, CDCl<sub>3</sub>): δ (ppm) 172.78 (1C, NHCOCH<sub>2</sub>), 172.11 (1C, CONHCH), 171.91 (1C, CH<sub>2</sub>COOCH<sub>2</sub>), 171.86 (1C, NHCHCO), 65.68 (1C, COOCH<sub>2</sub>), 64.87 (1C, COOCH<sub>2</sub>), 57.19 (1C, NCH<sub>2</sub>CH<sub>2</sub>NH), 54.25 (2C, CH<sub>2</sub>(CH<sub>2</sub>CH<sub>2</sub>)<sub>2</sub>N), 51.78 (1C, NHCH), 35.86 (1C, NCH<sub>2</sub>CH<sub>2</sub>NH), 31.88 (2C, CH<sub>2</sub>CH<sub>2</sub>CH<sub>3</sub>), 31.52 (1C, CH<sub>2</sub>COOCH<sub>2</sub>), 30.30 (1C, COCH<sub>2</sub>CH<sub>2</sub>CO), 29.65, 29.63, 29.61 (8C, CH<sub>2</sub>(myristoyl)), 29.56 (2C, CH<sub>2</sub>(myristoyl)), 29.50 (1C, CH<sub>2</sub>(myristoyl)), 29.46 (1C, CH<sub>2</sub>(myristoyl)), 29.31 (2C, CH<sub>2</sub>(myristoyl), 1C, NHCHCH<sub>2</sub>), 29.24 (1C, CH<sub>2</sub>(myristoyl)), 29.18 (1C, CH<sub>2</sub>(myristoyl)), 28.58 (1C, OCH<sub>2</sub>CH<sub>2</sub>), 28.49 (1C, OCH<sub>2</sub>CH<sub>2</sub>), 27.43 (1C, COCH<sub>2</sub>CH<sub>2</sub>CO), 25.87 (1C, OCH<sub>2</sub>CH<sub>2</sub>CH<sub>2</sub>), 25.78 (1C, OCH<sub>2</sub>CH<sub>2</sub>CH<sub>2</sub>), 25.41 (2C, CH<sub>2</sub>(CH<sub>2</sub>CH<sub>2</sub>)<sub>2</sub>N), 24.01 (1C, CH<sub>2</sub>(CH<sub>2</sub>CH<sub>2</sub>)<sub>2</sub>N), 22.64 (2C, CH<sub>2</sub>CH<sub>3</sub>), 14.04 (2C, CH<sub>2</sub>CH<sub>3</sub>). HRMS, ESI<sup>+</sup>, *m/z*: Calcd for C<sub>44</sub>H<sub>84</sub>N<sub>3</sub>O<sub>6</sub> [M+H]<sup>+</sup>, 750.6360; found, 750.6367.

1.3.17. *ditetradecyl (4-oxo-4-((2-(pyridin-4-yl)ethyl)amino)butanoyl)glutamate (TA17)*

DCM/methanol (40/1). White gel-like solid. 28% yield. <sup>1</sup>H NMR (500 MHz, CDCl<sub>3</sub>): δ (ppm) 8.55 (brs, 2H, N(CHCH)<sub>2</sub>C), 7.34 (brs, 2H, N(CHCH)<sub>2</sub>C), 6.83 (brs, 1H, NHCOCH<sub>2</sub>), 6.64 (brs, 1H, CONHCH), 4.58 – 4.52 (m, 1H, NHCH), 4.12 (t, *J* = 6.3 Hz, 2H, COOCH<sub>2</sub>), 4.05 (t, *J* = 6.8 Hz, 2H, COOCH<sub>2</sub>), 3.54 (brs, 2H, CCH<sub>2</sub>CH<sub>2</sub>NH), 2.91 (brs, 2H, CCH<sub>2</sub>CH<sub>2</sub>NH), 2.55 (brs, 2H, CH<sub>2</sub>COO), 2.48 (brs, 2H, CH<sub>2</sub>CONH), 2.44 – 2.32 (m, 2H, CH<sub>2</sub>CONH), 2.23 – 2.14 (m, 1H, NHCHCH<sub>2</sub>), 2.04

– 1.95 (m, 1H, NHCHCH<sub>2</sub>), 1.66 – 1.58 (m, 4H, COOCH<sub>2</sub>CH<sub>2</sub>), 1.31 – 1.25 (m, 44H, CH<sub>2</sub>(myristoyl)), 0.88 (t, *J* = 7.0 Hz, 6H, CH<sub>2</sub>CH<sub>3</sub>). <sup>13</sup>C NMR (125 MHz, CDCl<sub>3</sub>): δ (ppm) 172.83 (1C, NHCOCH<sub>2</sub>), 172.31 (1C, CONHCH), 172.21 (1C, CH<sub>2</sub>COOCH<sub>2</sub>), 171.81 (1C, NHCHCO), 151.64 (2C, N(CHCH)<sub>2</sub>C), 147.23 (1C, N(CHCH)<sub>2</sub>C), 125.23 (2C, N(CHCH)<sub>2</sub>C), 65.80 (1C, COOCH<sub>2</sub>), 64.98 (1C, COOCH<sub>2</sub>), 51.94 (1C, NHCH), 39.53 (1C, CCH<sub>2</sub>CH<sub>2</sub>NH), 35.30 (1C, CCH<sub>2</sub>CH<sub>2</sub>NH), 31.87 (2C, CH<sub>2</sub>CH<sub>2</sub>CH<sub>3</sub>), 31.39 (1C, CH<sub>2</sub>COOCH<sub>2</sub>), 30.32 (1C, COCH<sub>2</sub>CH<sub>2</sub>CO), 29.65, 29.63, 29.61 (8C, CH<sub>2</sub>(myristoyl)), 29.55 (2C, CH<sub>2</sub>(myristoyl)), 29.49 (1C, CH<sub>2</sub>(myristoyl)), 29.47 (1C, CH<sub>2</sub>(myristoyl)), 29.30 (2C, CH<sub>2</sub>(myristoyl), 1C, NHCHCH<sub>2</sub>), 29.24 (1C, CH<sub>2</sub>(myristoyl)), 29.18 (1C, CH<sub>2</sub>(myristoyl)), 28.57 (1C, OCH<sub>2</sub>CH<sub>2</sub>), 28.49 (1C, OCH<sub>2</sub>CH<sub>2</sub>), 27.24 (1C, COCH<sub>2</sub>CH<sub>2</sub>CO), 25.87 (1C, OCH<sub>2</sub>CH<sub>2</sub>CH<sub>2</sub>), 25.79 (1C, OCH<sub>2</sub>CH<sub>2</sub>CH<sub>2</sub>), 22.63 (2C, CH<sub>2</sub>CH<sub>3</sub>), 14.04 (2C, CH<sub>2</sub>CH<sub>3</sub>). HRMS, ESI<sup>+</sup>, *m/z*: Calcd for C<sub>44</sub>H<sub>78</sub>N<sub>3</sub>O<sub>6</sub> [M+H]<sup>+</sup>, 744.5891; found, 744.5899.

*1.3.18. ditetradecyl (4-oxo-4-((3-(piperidin-1-yl)propyl)amino)butanoyl)glutamate (TA18)*

DCM/methanol (30/1). White gel-like solid. 32% yield. <sup>1</sup>H NMR (500 MHz, CDCl<sub>3</sub>): δ (ppm) 7.81 (brs, 1H, NHCOCH<sub>2</sub>), 7.22 (brs, 1H, CONHCH), 4.55 – 4.48 (m, 1H, NHCH), 4.10 (t, *J* = 6.7 Hz, 2H, COOCH<sub>2</sub>), 4.05 (t, *J* = 6.7 Hz, 2H, COOCH<sub>2</sub>), 3.58 (brs, 2H, NCH<sub>2</sub>CH<sub>2</sub>CH<sub>2</sub>NH), 3.38 (brs, 2H, CH<sub>2</sub>(CH<sub>2</sub>CH<sub>2</sub>)<sub>2</sub>N), 3.10 (brs, 2H, CH<sub>2</sub>(CH<sub>2</sub>CH<sub>2</sub>)<sub>2</sub>N), 2.75 – 2.65 (m, 2H, NCH<sub>2</sub>CH<sub>2</sub>CH<sub>2</sub>NH), 2.61 (brs, 2H, COCH<sub>2</sub>CH<sub>2</sub>CO, 2H, CH<sub>2</sub>COO), 2.48 – 2.34 (m, 2H, CH<sub>2</sub>CONH), 2.26 – 2.15 (m, 1H, NHCHCH<sub>2</sub>, 2H, CH<sub>2</sub>(CH<sub>2</sub>CH<sub>2</sub>)<sub>2</sub>N), 2.15 – 2.07 (m, 2H, CH<sub>2</sub>(CH<sub>2</sub>CH<sub>2</sub>)<sub>2</sub>N), 2.06 – 1.97 (m, 1H, NHCHCH<sub>2</sub>), 1.93 – 1.83 (m, 1H, CH<sub>2</sub>(CH<sub>2</sub>CH<sub>2</sub>)<sub>2</sub>N, 2H, NCH<sub>2</sub>CH<sub>2</sub>CH<sub>2</sub>NH), 1.67 – 1.58 (m, 4H, COOCH<sub>2</sub>CH<sub>2</sub>), 1.49 – 1.38 (m, 1H, CH<sub>2</sub>(CH<sub>2</sub>CH<sub>2</sub>)<sub>2</sub>N), 1.32 – 1.25 (m, 44H, CH<sub>2</sub>(myristoyl)), 0.88 (t, *J* = 6.8 Hz, 6H, CH<sub>2</sub>CH<sub>3</sub>). <sup>13</sup>C NMR (125 MHz, CDCl<sub>3</sub>): δ (ppm) 173.24 (1C, NHCOCH<sub>2</sub>), 172.79 (1C, CONHCH), 172.41 (1C, CH<sub>2</sub>COOCH<sub>2</sub>), 171.98 (1C, NHCHCO), 65.67 (1C, COOCH<sub>2</sub>), 64.86 (1C, COOCH<sub>2</sub>), 54.55 (2C, CH<sub>2</sub>(CH<sub>2</sub>CH<sub>2</sub>)<sub>2</sub>N), 53.37 (1C, NCH<sub>2</sub>CH<sub>2</sub>CH<sub>2</sub>NH), 53.28 (1C, NCH<sub>2</sub>CH<sub>2</sub>CH<sub>2</sub>NH), 51.95 (1C, NHCH), 36.20 (1C, NCH<sub>2</sub>CH<sub>2</sub>CH<sub>2</sub>NH), 31.86 (2C, CH<sub>2</sub>CH<sub>2</sub>CH<sub>3</sub>), 31.32 (1C, CH<sub>2</sub>COOCH<sub>2</sub>), 30.39 (1C,



COCH<sub>2</sub>CH<sub>2</sub>CO), 29.62, 29.60 (8C, CH<sub>2</sub>(myristoyl)), 29.55 (2C, CH<sub>2</sub>(myristoyl)), 29.49 (1C, CH<sub>2</sub>(myristoyl)), 29.47 (1C, CH<sub>2</sub>(myristoyl)), 29.29 (2C, CH<sub>2</sub>(myristoyl), 1C, NHCHCH<sub>2</sub>), 29.24 (1C, CH<sub>2</sub>(myristoyl)), 29.20 (1C, CH<sub>2</sub>(myristoyl)), 28.57 (1C, OCH<sub>2</sub>CH<sub>2</sub>), 28.49 (1C, OCH<sub>2</sub>CH<sub>2</sub>), 27.16 (1C, COCH<sub>2</sub>CH<sub>2</sub>CO), 25.87 (1C, OCH<sub>2</sub>CH<sub>2</sub>CH<sub>2</sub>), 25.80 (1C, OCH<sub>2</sub>CH<sub>2</sub>CH<sub>2</sub>), 23.77 (2C, CH<sub>2</sub>(CH<sub>2</sub>CH<sub>2</sub>)<sub>2</sub>N), 22.62 (2C, CH<sub>2</sub>CH<sub>3</sub>), 22.11 (1C, CH<sub>2</sub>(CH<sub>2</sub>CH<sub>2</sub>)<sub>2</sub>N), 14.03 (2C, CH<sub>2</sub>CH<sub>3</sub>). HRMS, ESI<sup>+</sup>, m/z: Calcd for C<sub>45</sub>H<sub>86</sub>N<sub>3</sub>O<sub>6</sub> [M+H]<sup>+</sup>, 764.6517; found, 764.6527.

1.3.19. *ditetradecyl (4-(((1-methylpiperidin-4-yl)methyl)amino)-4-oxobutanoyl) glutamate (TA19)*

DCM/methanol (25/1). White gel-like solid. 44% yield. <sup>1</sup>H NMR (500 MHz, CDCl<sub>3</sub>): δ (ppm) 7.36 (brs, 1H, NHCOCH<sub>2</sub>), 7.30 (brs, 1H, CONHCH), 4.53 – 4.47 (m, 1H, NHCH), 4.15 – 4.07 (m, 2H, COOCH<sub>2</sub>), 4.04 (t, *J* = 7.1 Hz, 2H, COOCH<sub>2</sub>), 3.43 (d, *J* = 11.4 Hz, 2H, CH<sub>3</sub>N(CH<sub>2</sub>CH<sub>2</sub>)<sub>2</sub>CHCH<sub>2</sub>), 3.24 – 3.15 (m, 2H, CH<sub>3</sub>N(CH<sub>2</sub>CH<sub>2</sub>)<sub>2</sub>CH), 2.82 – 2.75 (m, 2H, CH<sub>3</sub>N(CH<sub>2</sub>CH<sub>2</sub>)<sub>2</sub>CH), 2.74 (s, 3H, NCH<sub>3</sub>), 2.64 – 2.59 (m, 2H, COCH<sub>2</sub>CH<sub>2</sub>CO), 2.59 – 2.55 (m, 2H, CH<sub>2</sub>COO), 2.47 – 2.35 (m, 2H, CH<sub>2</sub>CONH), 2.20 – 2.11 (m, 1H, NHCHCH<sub>2</sub>), 2.05 – 1.98 (m, 1H, NHCHCH<sub>2</sub>), 1.96 – 1.90 (m, 2H, CH<sub>3</sub>N(CH<sub>2</sub>CH<sub>2</sub>)<sub>2</sub>CH), 1.87 – 1.75 (m, 1H, CH<sub>3</sub>N(CH<sub>2</sub>CH<sub>2</sub>)<sub>2</sub>CH), 2H, CH<sub>3</sub>N(CH<sub>2</sub>CH<sub>2</sub>)<sub>2</sub>CH), 1.67 – 1.57 (m, 4H, COOCH<sub>2</sub>CH<sub>2</sub>), 1.32 – 1.25 (m, 44H, CH<sub>2</sub>(myristoyl)), 0.88 (t, *J* = 7.0 Hz, 6H, CH<sub>2</sub>CH<sub>3</sub>). <sup>13</sup>C NMR (125 MHz, CDCl<sub>3</sub>): δ (ppm) 172.85 (1C, NHCOCH<sub>2</sub>), 172.80 (1C, CONHCH), 172.47 (1C, CH<sub>2</sub>COOCH<sub>2</sub>), 171.94 (1C, NHCHCO), 65.63 (1C, COOCH<sub>2</sub>), 64.87 (1C, COOCH<sub>2</sub>), 54.31 (2C, CH<sub>3</sub>N(CH<sub>2</sub>CH<sub>2</sub>)<sub>2</sub>CH), 51.93 (1C, NHCH), 43.69 (1C, CH<sub>3</sub>N), 43.56 (1C, CH<sub>3</sub>N(CH<sub>2</sub>CH<sub>2</sub>)<sub>2</sub>CHCH<sub>2</sub>), 33.37 (1C, CH<sub>3</sub>N(CH<sub>2</sub>CH<sub>2</sub>)<sub>2</sub>CH), 31.85 (2C, CH<sub>2</sub>CH<sub>2</sub>CH<sub>3</sub>), 31.57 (1C, CH<sub>2</sub>COOCH<sub>2</sub>), 30.39 (1C, COCH<sub>2</sub>CH<sub>2</sub>CO), 29.62, 29.59 (8C, CH<sub>2</sub>(myristoyl)), 29.55 (2C, CH<sub>2</sub>(myristoyl)), 29.48 (1C, CH<sub>2</sub>(myristoyl)), 29.46 (1C, CH<sub>2</sub>(myristoyl)), 29.28 (2C, CH<sub>2</sub>(myristoyl), 1C, NHCHCH<sub>2</sub>), 29.23 (1C, CH<sub>2</sub>(myristoyl)), 29.19 (1C, CH<sub>2</sub>(myristoyl)), 28.56 (1C, OCH<sub>2</sub>CH<sub>2</sub>), 28.47 (1C, OCH<sub>2</sub>CH<sub>2</sub>), 27.11 (1C, COCH<sub>2</sub>CH<sub>2</sub>CO), 26.99 (2C, CH<sub>3</sub>N(CH<sub>2</sub>CH<sub>2</sub>)<sub>2</sub>CH), 25.86 (1C, OCH<sub>2</sub>CH<sub>2</sub>CH<sub>2</sub>), 25.80 (1C, OCH<sub>2</sub>CH<sub>2</sub>CH<sub>2</sub>), 22.60 (2C, CH<sub>2</sub>CH<sub>3</sub>), 14.02 (2C, CH<sub>2</sub>CH<sub>3</sub>). HRMS, ESI<sup>+</sup>, m/z: Calcd for C<sub>44</sub>H<sub>84</sub>N<sub>3</sub>O<sub>6</sub> [M+H]<sup>+</sup>, 750.6360; found, 750.6379.

1.3.20. *ditetradecyl (4-((1-benzylpyrrolidin-3-yl)amino)-4-oxobutanoyl)glutamate (TA20)*

DCM/methanol (40/1). White solid. 40% yield.  $^1\text{H}$  NMR (500 MHz,  $\text{CDCl}_3$ ):  $\delta$  (ppm) 7.32 (s, 2H,  $\text{C}_6\text{H}_5\text{CH}_2$ ), 7.31 (s, 2H,  $\text{C}_6\text{H}_5\text{CH}_2$ ), 7.26 (s, 1H,  $\text{C}_6\text{H}_5\text{CH}_2$ ), 6.64 (t,  $J = 8.2$  Hz, 1H,  $\text{NHCOCH}_2$ ), 6.27 (brs, 1H,  $\text{CONHCH}$ ), 4.59 – 4.54 (m, 1H,  $\text{NHCH}$ ), 4.48 – 4.40 (m, 1H,  $\text{N}(\text{CH}_2\text{CH}_2)(\text{CH}_2)\text{CH}$ ), 4.13 – 4.08 (m, 2H,  $\text{COOCH}_2$ ), 4.05 (t,  $J = 6.7$  Hz, 2H,  $\text{COOCH}_2$ ), 3.68 – 3.62 (m, 2H,  $\text{C}_6\text{H}_5\text{CH}_2$ ), 2.93 – 2.85 (m, 1H,  $\text{N}(\text{CH}_2\text{CH}_2)(\text{CH}_2)\text{CH}$ ), 2.64 – 2.59 (m, 2H,  $\text{N}(\text{CH}_2\text{CH}_2)(\text{CH}_2)\text{CH}$ ), 2.57 – 2.52 (m, 2H,  $\text{COCH}_2\text{CH}_2\text{CO}$ ), 2.49 – 2.45 (m, 2H,  $\text{CH}_2\text{COO}$ ), 2.41 – 2.30 (m, 2H,  $\text{CH}_2\text{CONH}$ , 1H,  $\text{N}(\text{CH}_2\text{CH}_2)(\text{CH}_2)\text{CH}$ ), 2.29 – 2.22 (m, 1H,  $\text{N}(\text{CH}_2\text{CH}_2)(\text{CH}_2)\text{CH}$ ), 2.21 – 2.13 (m, 1H,  $\text{NHCHCH}_2$ ), 2.01 – 1.93 (m, 1H,  $\text{NHCHCH}_2$ ), 1.65 – 1.58 (m, 4H,  $\text{COOCH}_2\text{CH}_2$ , 1H,  $\text{N}(\text{CH}_2\text{CH}_2)(\text{CH}_2)\text{CH}$ ), 1.29 – 1.25 (m, 44H,  $\text{CH}_2(\text{myristoyl})$ ), 0.88 (t,  $J = 7.1$  Hz, 6H,  $\text{CH}_2\text{CH}_3$ ).  $^{13}\text{C}$  NMR (125 MHz,  $\text{CDCl}_3$ ):  $\delta$  (ppm) 172.80 (1C,  $\text{NHCOCH}_2$ ), 172.00 (1C,  $\text{CONHCH}$ ), 171.82 (1C,  $\text{CH}_2\text{COOCH}_2$ ), 171.17 (1C,  $\text{NHCHCO}$ ), 128.91 (1C,  $\text{C}_6\text{H}_5\text{CH}_2$ ), 128.37 (4C,  $\text{C}_6\text{H}_5\text{CH}_2$ ), 127.30 (1C,  $\text{C}_6\text{H}_5\text{CH}_2$ ), 65.74 (1C,  $\text{COOCH}_2$ ), 64.91 (1C,  $\text{COOCH}_2$ ), 60.46 (1C,  $\text{N}(\text{CH}_2\text{CH}_2)(\text{CH}_2)\text{CH}$ ), 59.91 (1C,  $\text{C}_6\text{H}_5\text{CH}_2$ ), 52.49 (1C,  $\text{N}(\text{CH}_2\text{CH}_2)(\text{CH}_2)\text{CH}$ ), 51.82 (1C,  $\text{NHCH}$ ), 48.69 (1C,  $\text{N}(\text{CH}_2\text{CH}_2)(\text{CH}_2)\text{CH}$ ), 32.36 (1C,  $\text{N}(\text{CH}_2\text{CH}_2)(\text{CH}_2)\text{CH}$ ), 31.91 (2C,  $\text{CH}_2\text{CH}_2\text{CH}_3$ ), 31.51 (1C,  $\text{CH}_2\text{COOCH}_2$ ), 30.30 (1C,  $\text{COCH}_2\text{CH}_2\text{CO}$ ), 29.68, 29.64 (8C,  $\text{CH}_2(\text{myristoyl})$ ), 29.59 (2C,  $\text{CH}_2(\text{myristoyl})$ ), 29.52 (1C,  $\text{CH}_2(\text{myristoyl})$ ), 29.49 (1C,  $\text{CH}_2(\text{myristoyl})$ ), 29.34 (2C,  $\text{CH}_2(\text{myristoyl})$ ), 1C,  $\text{NHCHCH}_2$ ), 29.27 (1C,  $\text{CH}_2(\text{myristoyl})$ ), 29.20 (1C,  $\text{CH}_2(\text{myristoyl})$ ), 28.61 (1C,  $\text{OCH}_2\text{CH}_2$ ), 28.51 (1C,  $\text{OCH}_2\text{CH}_2$ ), 27.45 (1C,  $\text{COCH}_2\text{CH}_2\text{CO}$ ), 25.90 (1C,  $\text{OCH}_2\text{CH}_2\text{CH}_2$ ), 25.81 (1C,  $\text{OCH}_2\text{CH}_2\text{CH}_2$ ), 22.66 (2C,  $\text{CH}_2\text{CH}_3$ ), 14.07 (2C,  $\text{CH}_2\text{CH}_3$ ). HRMS,  $\text{ESI}^+$ ,  $m/z$ : Calcd for  $\text{C}_{48}\text{H}_{84}\text{N}_3\text{O}_6$   $[\text{M}+\text{H}]^+$ , 798.6360; found, 798.6368.

1.3.21. *ditetradecyl (4-((1-benzylpiperidin-4-yl)amino)-4-oxobutanoyl)glutamate (TA21)*

DCM/methanol (35/1). Yellow-white solid. 29% yield.  $^1\text{H}$  NMR (500 MHz,  $\text{CDCl}_3$ ):  $\delta$  (ppm) 7.30 (s, 2H,  $\text{C}_6\text{H}_5\text{CH}_2$ ), 7.29 (s, 2H,  $\text{C}_6\text{H}_5\text{CH}_2$ ), 7.26 – 7.22 (m, 1H,  $\text{C}_6\text{H}_5\text{CH}_2$ ), 6.66 (t,  $J = 7.0$  Hz, 1H,  $\text{NHCOCH}_2$ ), 5.89 (brs, 1H,  $\text{CONHCH}$ ), 4.59 –

4.54 (m, 1H, NHCH), 4.11 (t,  $J = 6.7$  Hz, 2H, COOCH<sub>2</sub>), 4.04 (t,  $J = 6.9$  Hz, 2H, COOCH<sub>2</sub>), 3.82 – 3.73 (m, 1H, CH<sub>3</sub>N(CH<sub>2</sub>CH<sub>2</sub>)<sub>2</sub>CH), 3.49 (s, 2H, C<sub>6</sub>H<sub>5</sub>CH<sub>2</sub>), 2.83 – 2.75 (m, 2H, N(CH<sub>2</sub>CH<sub>2</sub>)<sub>2</sub>CH), 2.58 – 2.53 (m, 2H, COCH<sub>2</sub>CH<sub>2</sub>CO), 2.53 – 2.44 (m, 2H, CH<sub>2</sub>COO), 2.43 – 2.29 (m, 2H, CH<sub>2</sub>CONH), 2.22 – 2.16 (m, 1H, NHCHCH<sub>2</sub>), 2.16 – 2.09 (m, 2H, N(CH<sub>2</sub>CH<sub>2</sub>)<sub>2</sub>CH), 2.02 – 1.93 (m, 1H, NHCHCH<sub>2</sub>), 1.91 – 1.84 (m, 2H, N(CH<sub>2</sub>CH<sub>2</sub>)<sub>2</sub>CH), 1.67 – 1.56 (m, 4H, COOCH<sub>2</sub>CH<sub>2</sub>), 1.51 – 1.42 (m, 2H, N(CH<sub>2</sub>CH<sub>2</sub>)<sub>2</sub>CH), 1.31 – 1.23 (m, 44H, CH<sub>2</sub>(myristoyl)), 0.88 (t,  $J = 6.7$  Hz, 6H, CH<sub>2</sub>CH<sub>3</sub>). <sup>13</sup>C NMR (125 MHz, CDCl<sub>3</sub>):  $\delta$  (ppm) 172.79 (1C, NHCOCH<sub>2</sub>), 172.10 (1C, CONHCH), 171.77 (1C, CH<sub>2</sub>COOCH<sub>2</sub>), 171.18 (1C, NHCHCO), 129.06 (1C, C<sub>6</sub>H<sub>5</sub>CH<sub>2</sub>), 128.19 (4C, C<sub>6</sub>H<sub>5</sub>CH<sub>2</sub>), 127.04 (1C, C<sub>6</sub>H<sub>5</sub>CH<sub>2</sub>), 65.74 (1C, COOCH<sub>2</sub>), 64.91 (1C, COOCH<sub>2</sub>), 62.98 (1C, C<sub>6</sub>H<sub>5</sub>CH<sub>2</sub>), 52.14 (2C, N(CH<sub>2</sub>CH<sub>2</sub>)<sub>2</sub>CH), 51.82 (1C, NHCH), 46.56 (1C, N(CH<sub>2</sub>CH<sub>2</sub>)<sub>2</sub>CH), 32.02 (2C, N(CH<sub>2</sub>CH<sub>2</sub>)<sub>2</sub>CH), 31.89 (2C, CH<sub>2</sub>CH<sub>2</sub>CH<sub>3</sub>), 31.62 (1C, CH<sub>2</sub>COOCH<sub>2</sub>), 30.29 (1C, COCH<sub>2</sub>CH<sub>2</sub>CO), 29.66, 29.64, 29.62 (8C, CH<sub>2</sub>(myristoyl)), 29.57, 29.56 (2C, CH<sub>2</sub>(myristoyl)), 29.51 (1C, CH<sub>2</sub>(myristoyl)), 29.47 (1C, CH<sub>2</sub>(myristoyl)), 29.31 (2C, CH<sub>2</sub>(myristoyl), 1C, NHCHCH<sub>2</sub>), 29.25 (1C, CH<sub>2</sub>(myristoyl)), 29.18 (1C, CH<sub>2</sub>(myristoyl)), 28.58 (1C, OCH<sub>2</sub>CH<sub>2</sub>), 28.49 (1C, OCH<sub>2</sub>CH<sub>2</sub>), 27.39 (1C, COCH<sub>2</sub>CH<sub>2</sub>CO), 25.87 (1C, OCH<sub>2</sub>CH<sub>2</sub>CH<sub>2</sub>), 25.78 (1C, OCH<sub>2</sub>CH<sub>2</sub>CH<sub>2</sub>), 22.64 (2C, CH<sub>2</sub>CH<sub>3</sub>), 14.05 (2C, CH<sub>2</sub>CH<sub>3</sub>). HRMS, ESI<sup>+</sup>,  $m/z$ : Calcd for C<sub>49</sub>H<sub>86</sub>N<sub>3</sub>O<sub>6</sub> [M+H]<sup>+</sup>, 812.6517; found, 812.6504.

## Supplemental Figures



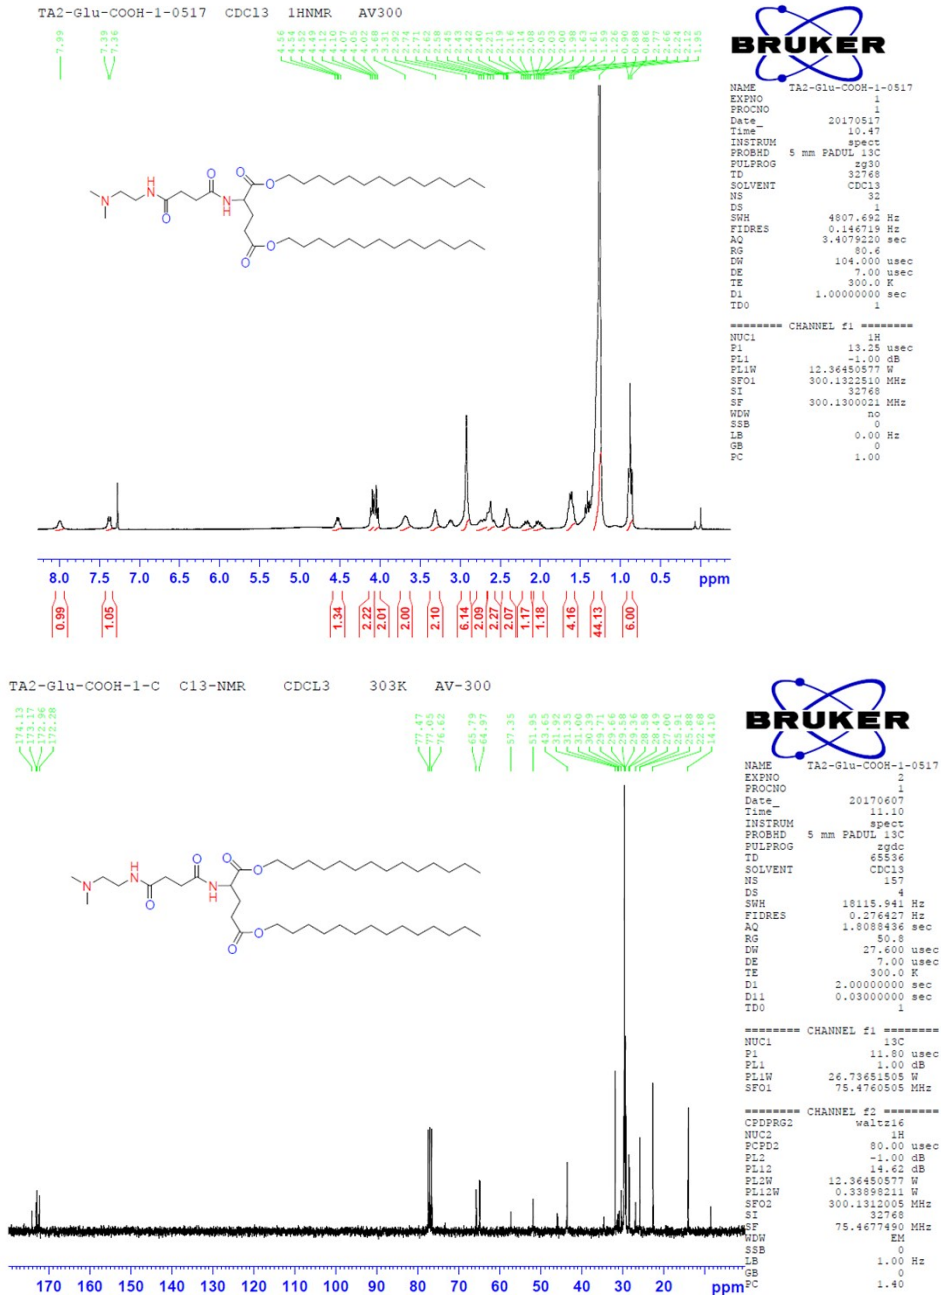

### User Spectra

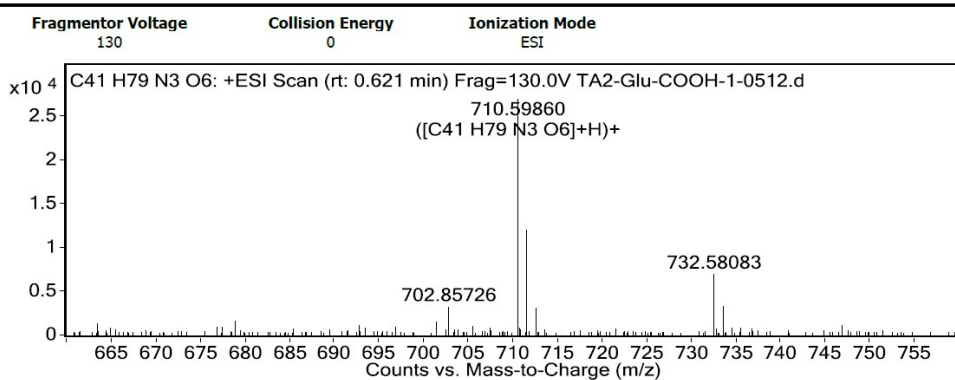

Figure S2. <sup>1</sup>H NMR, <sup>13</sup>C NMR and HRMS spectra of compound TA1

LZM-A-2-0622 H1-NMR CDCL3 303K AV-300

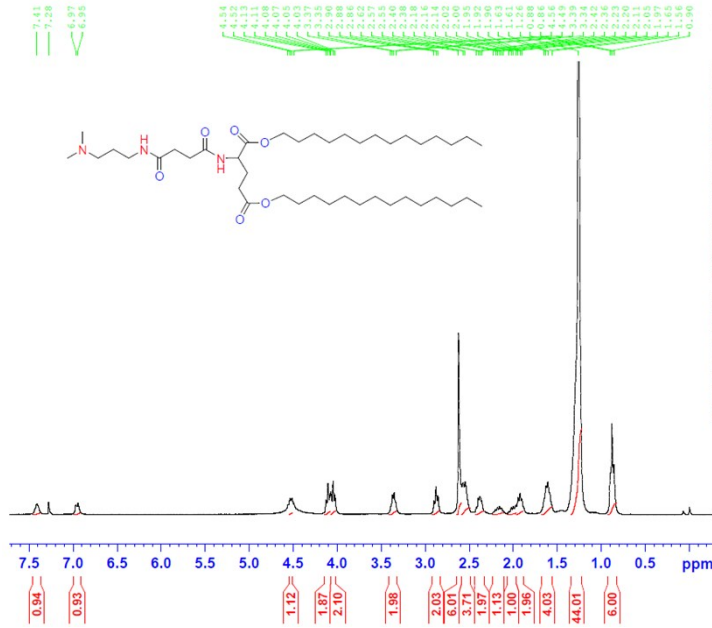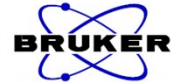

```

NAME LZM-A-2-0622-H
EXPNO 1
PROCNO 1
Date_ 20170622
Time_ 16:07
INSTRUM av500
PROBHD 5 mm PABBI 1H-
PULPROG zg30
TD 33880
SOLVENT CDCl3
NS 4
DS 0
SWH 5995.204 Hz
FIDRES 0.250008 Hz
AQ 1.9999920 sec
RG 80
DM 93.400 usec
DE 6.00 usec
TE 300.0 K
D1 1.20000005 sec

===== CHANNEL f1 =====
NUC1 1H
P1 8.80 usec
PL1 -2.00 dB
SFO1 300.1324010 MHz
SI 32768
SF 300.1300069 MHz
WDW EM
SSB 0
LB 0.30 Hz
GB 0
PC 1.00
    
```

LZM-A-2-0622 H1-NMR CDCL3 303K AV-300

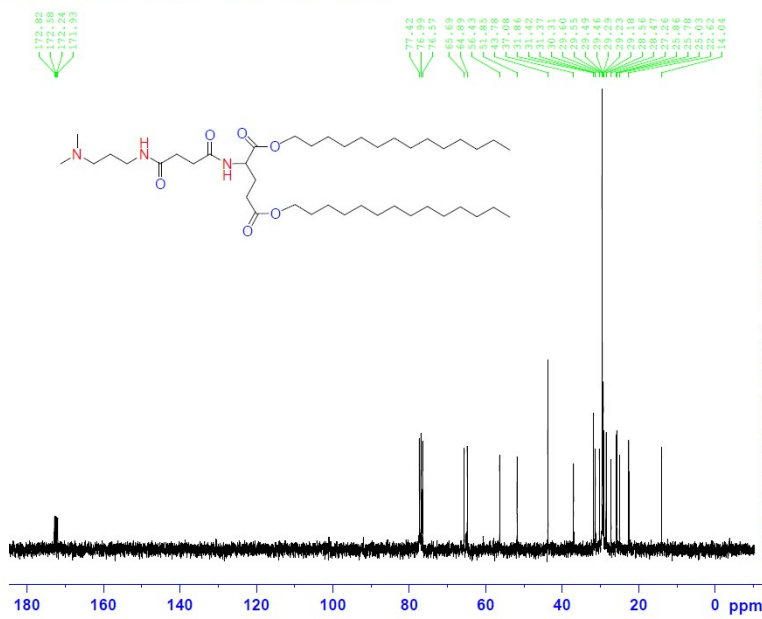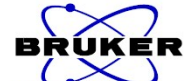

```

NAME LZM-A-2-0622-C
EXPNO 1001
PROCNO 1
Date_ 20170622
Time_ 16:07
INSTRUM av500
PROBHD 5 mm PABBI 1H-
PULPROG zgdc
TD 32768
SOLVENT CDCl3
NS 307
DS 0
SWH 19607.844 Hz
FIDRES 0.598384 Hz
AQ 0.8356340 sec
RG 102400
DM 25.500 usec
DE 39.43 usec
TE 308.0 K
D1 1.00000000 sec
d11 0.03000000 sec

===== CHANNEL f1 =====
NUC1 13C
P1 6.20 usec
PL1 -5.00 dB
SFO1 75.4767751 MHz

===== CHANNEL f2 =====
CPDPRG2 waltz16
NUC2 1H
PCPD2 80.00 usec
PL2 -2.00 dB
PL12 18.00 dB
SFO2 300.1312005 MHz
SI 32768
SF 75.4677520 MHz
WDW EM
SSB 0
LB 1.00 Hz
GB 0
PC 0.80
    
```

### User Spectra

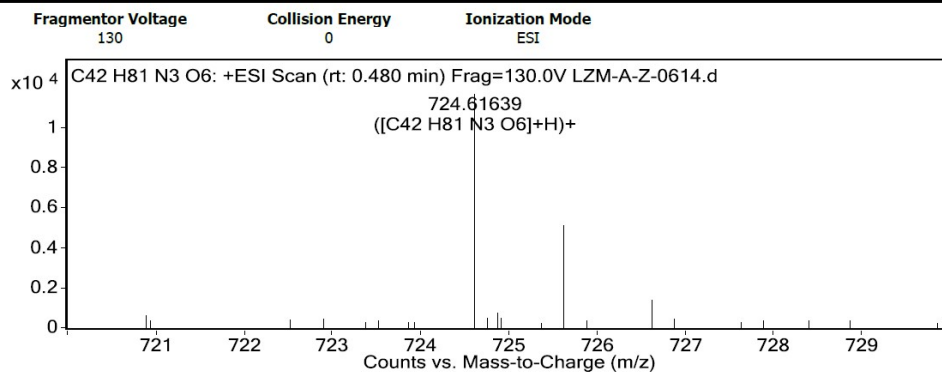

Figure S3. <sup>1</sup>H NMR, <sup>13</sup>C NMR and HRMS spectra of compound TA2

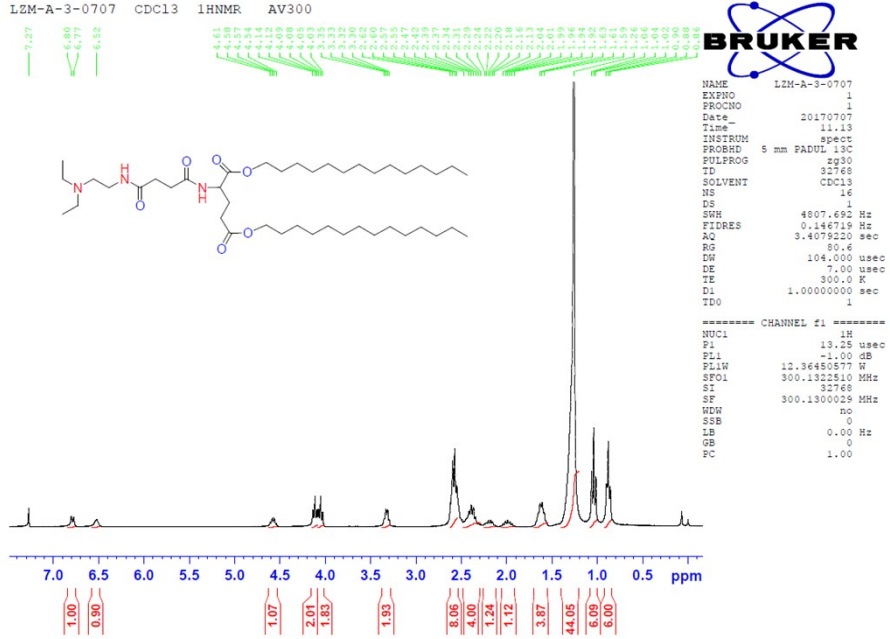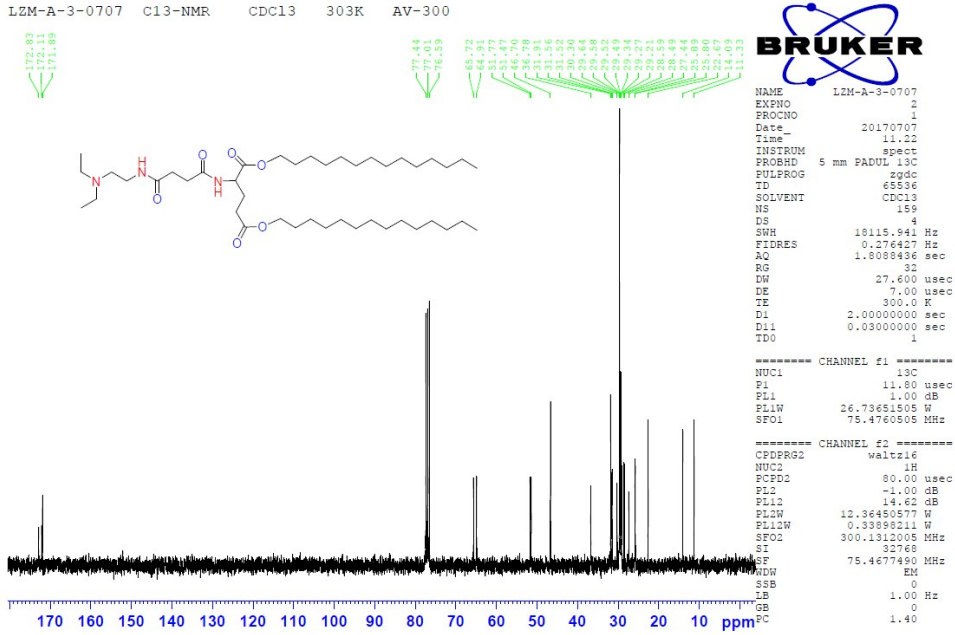

### User Spectra

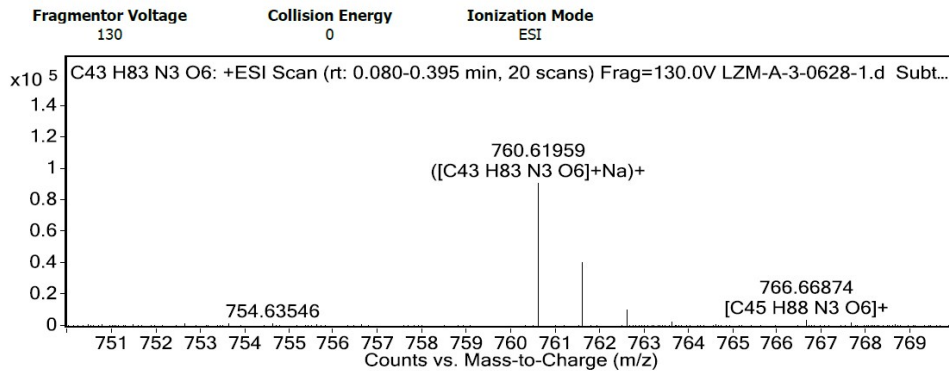

**Figure S4.**  $^1\text{H}$  NMR,  $^{13}\text{C}$  NMR and HRMS spectra of compound TA3

lzm-a-4-0803 H1-NMR cdcl3 303K AV-300

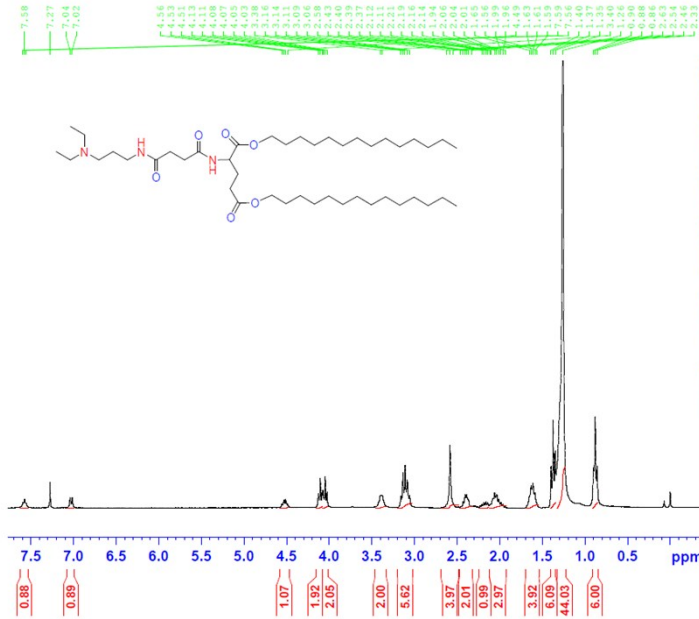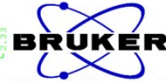

```

NAME L2M-A-4-0803-H
EXPNO 5
PROCNO 1
Date_ 20170803
Time 17.04
INSTRUM av500
PROBHD 5 mm PABBI 1H-
PULPROG zg30
TD 23880
SOLVENT CDCl3
NS 6
DS 0
SWH 5995.204 Hz
FIDRES 0.250008 Hz
AQ 1.389820 sec
RG 80
DM 83.400 usec
DE 6.00 usec
TE 300.0 K
D1 1.20000005 sec

===== CHANNEL f1 =====
NUC1 1H
P1 8.80 usec
PL1 -2.00 dB
SFO1 300.1324010 MHz
SI 32768
SF 300.1300075 MHz
WDW EM
SSB 0
LB 0.30 Hz
GB 0
PC 1.00

```

L2M-A-4-0803 H1-NMR CDCl3 303K AV-300

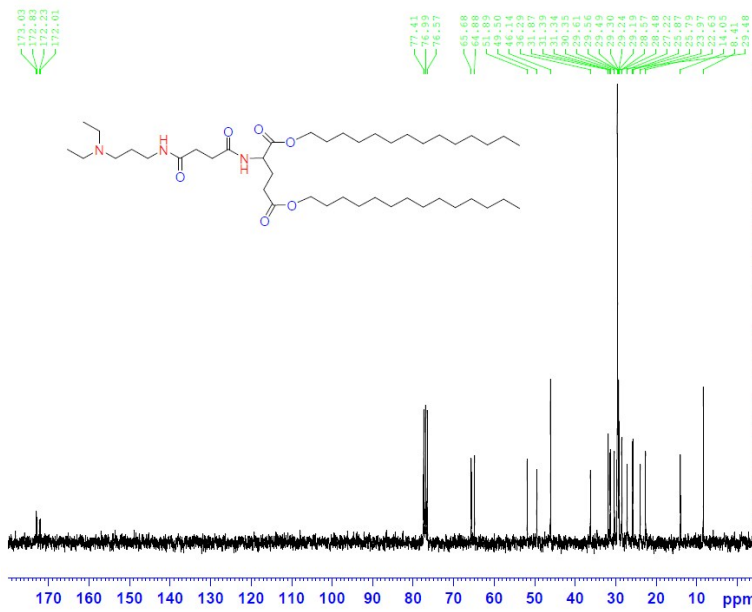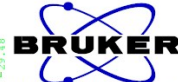

```

NAME L2M-A-4-0803-C
EXPNO 1005
PROCNO 1
Date_ 20170803
Time 17.11
INSTRUM av500
PROBHD 5 mm PABBI 1H-
PULPROG zgdc
TD 32768
SOLVENT CDCl3
NS 425
DS 0
SWH 19607.844 Hz
FIDRES 0.598384 Hz
AQ 0.8356340 sec
RG 102400
DM 25.500 usec
DE 39.43 usec
TE 308.0 K
D1 1.00000000 sec
d11 0.33000000 sec

===== CHANNEL f1 =====
NUC1 13C
P1 6.20 usec
PL1 -5.00 dB
SFO1 75.4767751 MHz

===== CHANNEL f2 =====
CPDPRG2 waltz16
NUC2 1H
PCPD2 80.00 usec
PL2 -2.00 dB
PL12 18.00 dB
SFO2 300.1312005 MHz
SI 32768
SF 75.4677520 MHz
WDW EM
SSB 0
LB 2.00 Hz
GB 0
PC 0.80

```

### User Spectra

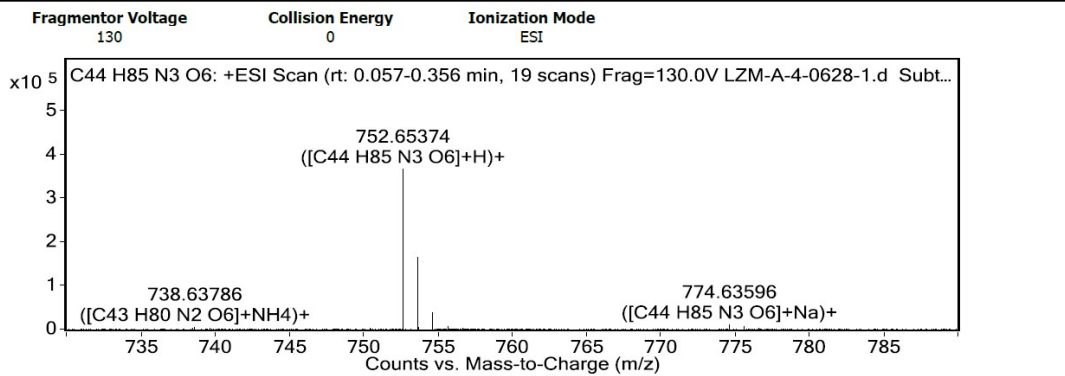

Figure S5. <sup>1</sup>H NMR, <sup>13</sup>C NMR and HRMS spectra of compound TA4





LZM-A-6-1120 H1-NMR CDCl3 303K AV-500

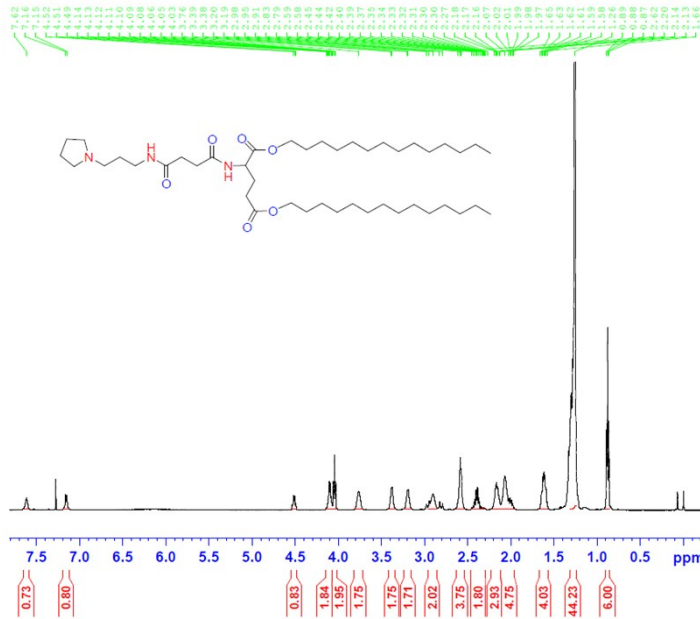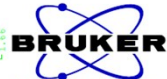

NAME LZM-A-6-1121  
 EXPNO 533  
 PROCNO 1  
 Date\_ 20171121  
 Time\_ 17.01  
 INSTRUM WNMN-I-500MHz  
 FULPROG sipul30  
 TD 40810  
 SOLVENT CDCl3  
 NS 7  
 DS 0  
 SWH 8107.895 Hz  
 AQ 2.4982016 sec  
 RG 35  
 DW 61.668 usec  
 DE 30.00 usec  
 TE 303.1 K  
 NUCL1 1H  
 PL1 120.00 dB  
 SFO1 500.1268562 MHz  
 SI 32768  
 SF 500.1196124 MHz  
 WDW EM  
 SSB 0  
 LB 0.30 Hz  
 GB 0.1  
 PC 1.00

LZM-A-6-1120 C13-NMR CDCl3 303K AV-500

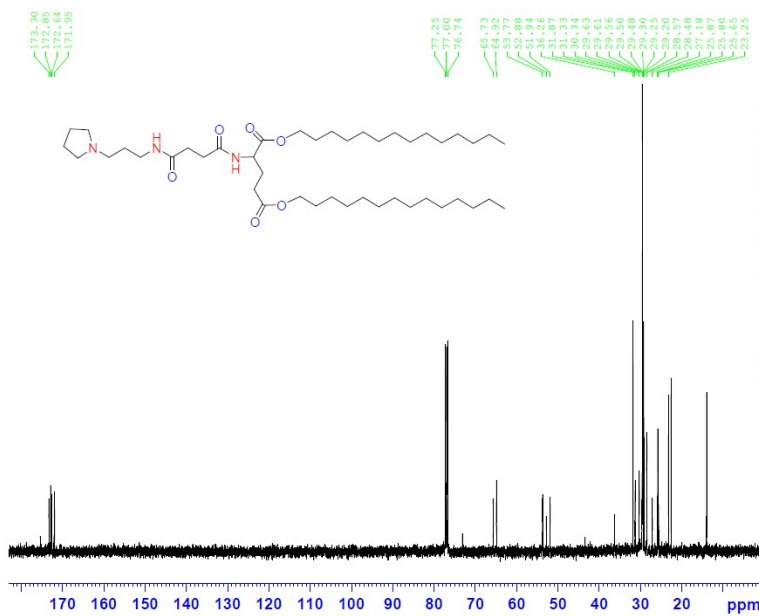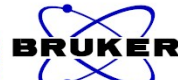

NAME LZM-A-6-1121  
 EXPNO 533  
 PROCNO 1  
 Date\_ 20171121  
 Time\_ 17.00  
 INSTRUM WNMN-I-500MHz  
 FULPROG sipul30  
 TD 64098  
 SOLVENT CDCl3  
 NS 343  
 DS 0  
 SWH 32054.525 Hz  
 AQ 0.9998776 sec  
 RG 60  
 DW 15.598 usec  
 DE 30.00 usec  
 TE 303.1 K  
 NUCL1 13C  
 PL1 120.00 dB  
 SFO1 125.7708409 MHz  
 SI 32768  
 SF 125.7561947 MHz  
 WDW EM  
 SSB 0  
 LB 1.00 Hz  
 GB 0.1  
 PC 1.00

User Spectra

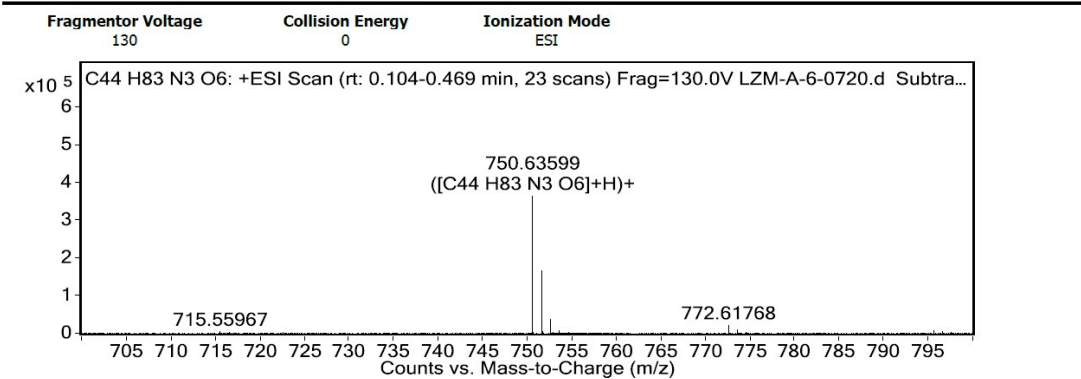

Figure S7. <sup>1</sup>H NMR, <sup>13</sup>C NMR and HRMS spectra of compound TA6

1zm-A-7-0908 CDCL3 1HNMR AV300

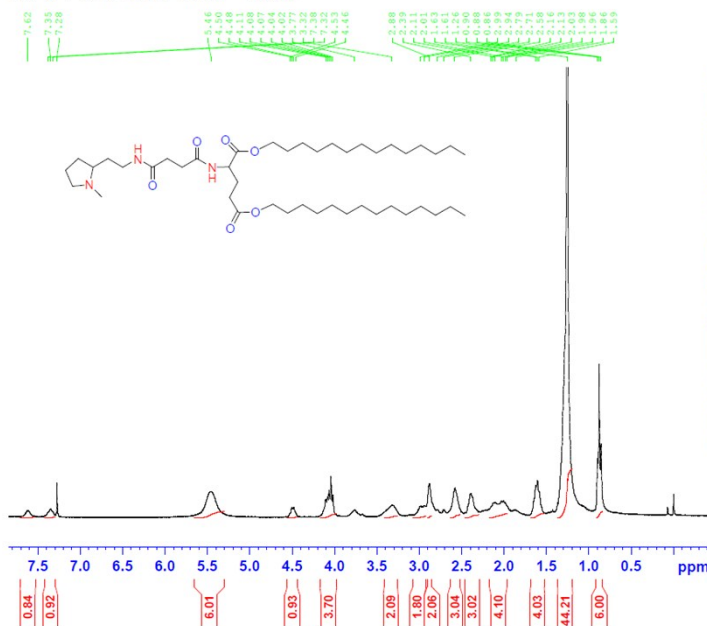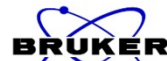

```

NAME      L2M-A-7-0908
EXPNO     1
PROCNO    1
Date_     20170908
Time_     10.53
INSTRUM   spect
PROBHD    5 mm PADUL 13C
PULPROG   zg30
TD         32768
SOLVENT   CDCl3
NS         4
DS         1
SWH        7211.539 Hz
FIDRES     0.220079 Hz
AQ         2.2719646 sec
RG         57
WDW        69.333 usec
DE         7.00 usec
TE         300.0 K
DL         1.00000000 sec
TDO        1
===== CHANNEL f1 =====
NUC1      1H
P1         13.25 usec
PL1        -1.00 dB
PL1W       12.36450577 W
SF01       300.1331514 MHz
SI         32768
SF         300.1300021 MHz
WDW        no
SSB        0
LB         0.00 Hz
GB         0
PC         1.80
    
```

1zm-A-7-0908 C13-NMR CDCL3 303K AV-300

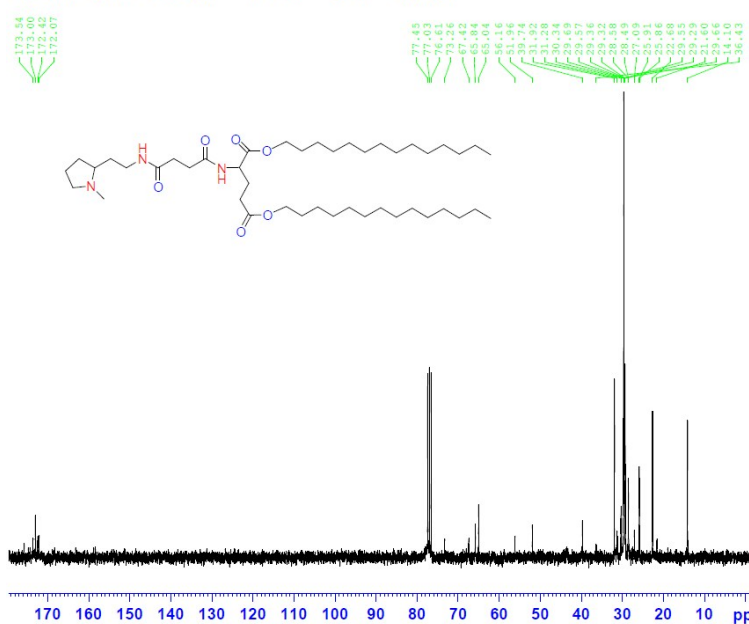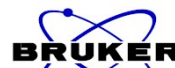

```

NAME      L2M-A-7-0908
EXPNO     2
PROCNO    1
Date_     20170908
Time_     11.07
INSTRUM   spect
PROBHD    5 mm PADUL 13C
PULPROG   zgpgc
TD         65536
SOLVENT   CDCl3
NS         270
DS         4
SWH        18115.941 Hz
FIDRES     0.276427 Hz
AQ         1.8088436 sec
RG         32
WDW        27.600 usec
DE         7.00 usec
TE         300.0 K
DL         2.00000000 sec
D11        0.03000000 sec
TDO        1
===== CHANNEL f1 =====
NUC1      13C
P1         11.80 usec
PL1         1.00 dB
PL1W       26.73681505 W
SF01       300.1312005 MHz
SI         32768
SF         75.4677490 MHz
WDW        EM
SSB        0
LB         1.00 Hz
GB         0
PC         1.40
===== CHANNEL f2 =====
CPDPRG2   waltz16
NUC2      1H
PCPD2     80.00 usec
PL2        -1.00 dB
PL12       14.62 dB
PL12W     12.36450577 W
PL12W     0.38898211 W
SF02       300.1312005 MHz
SI         32768
SF         75.4677490 MHz
WDW        EM
SSB        0
LB         1.00 Hz
GB         0
PC         1.40
    
```

### User Spectra

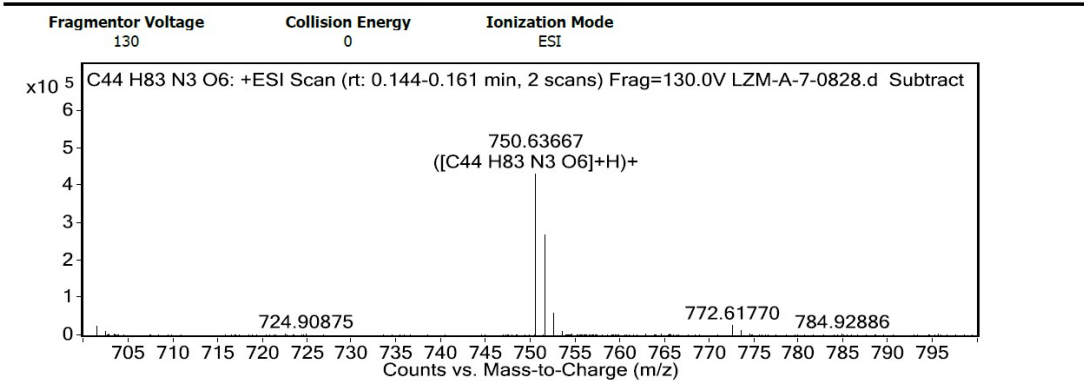

Figure S8. <sup>1</sup>H NMR, <sup>13</sup>C NMR and HRMS spectra of compound TA7

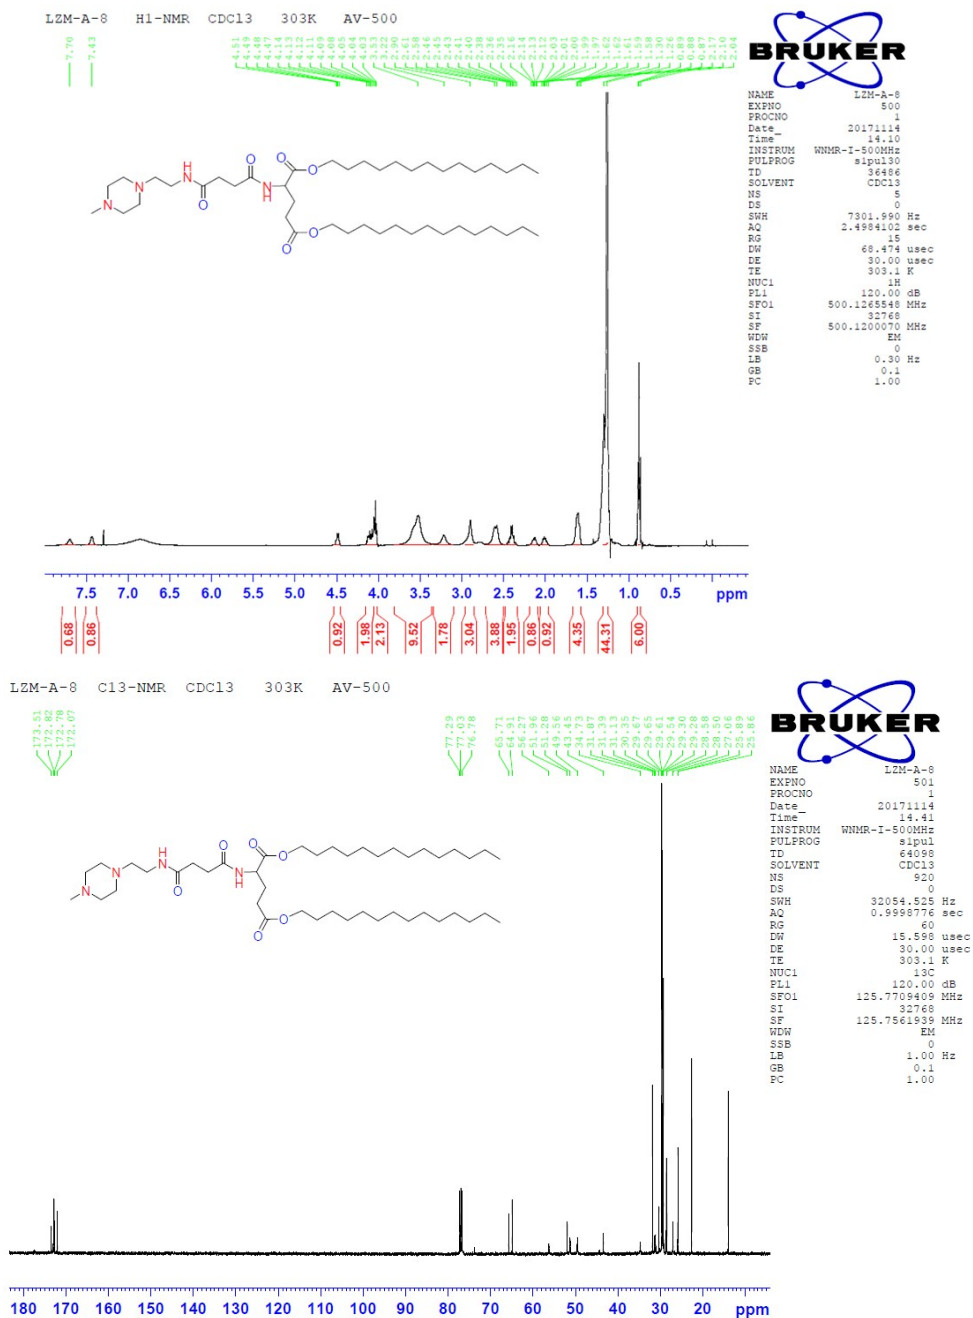

### User Spectra

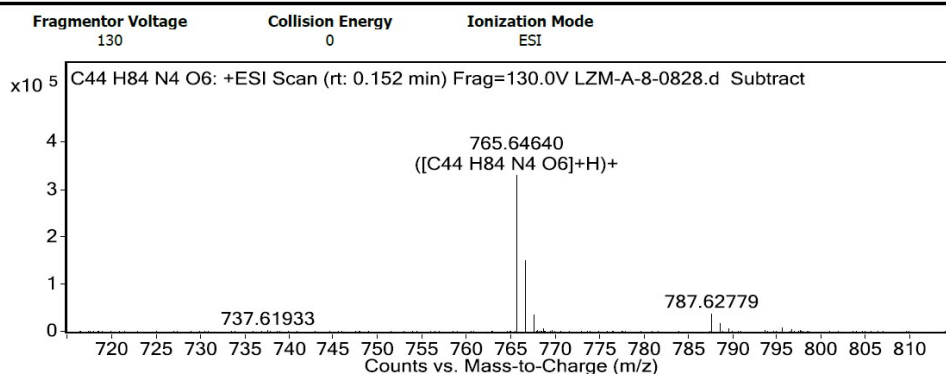

**Figure S9.** <sup>1</sup>H NMR, <sup>13</sup>C NMR and HRMS spectra of compound TA8

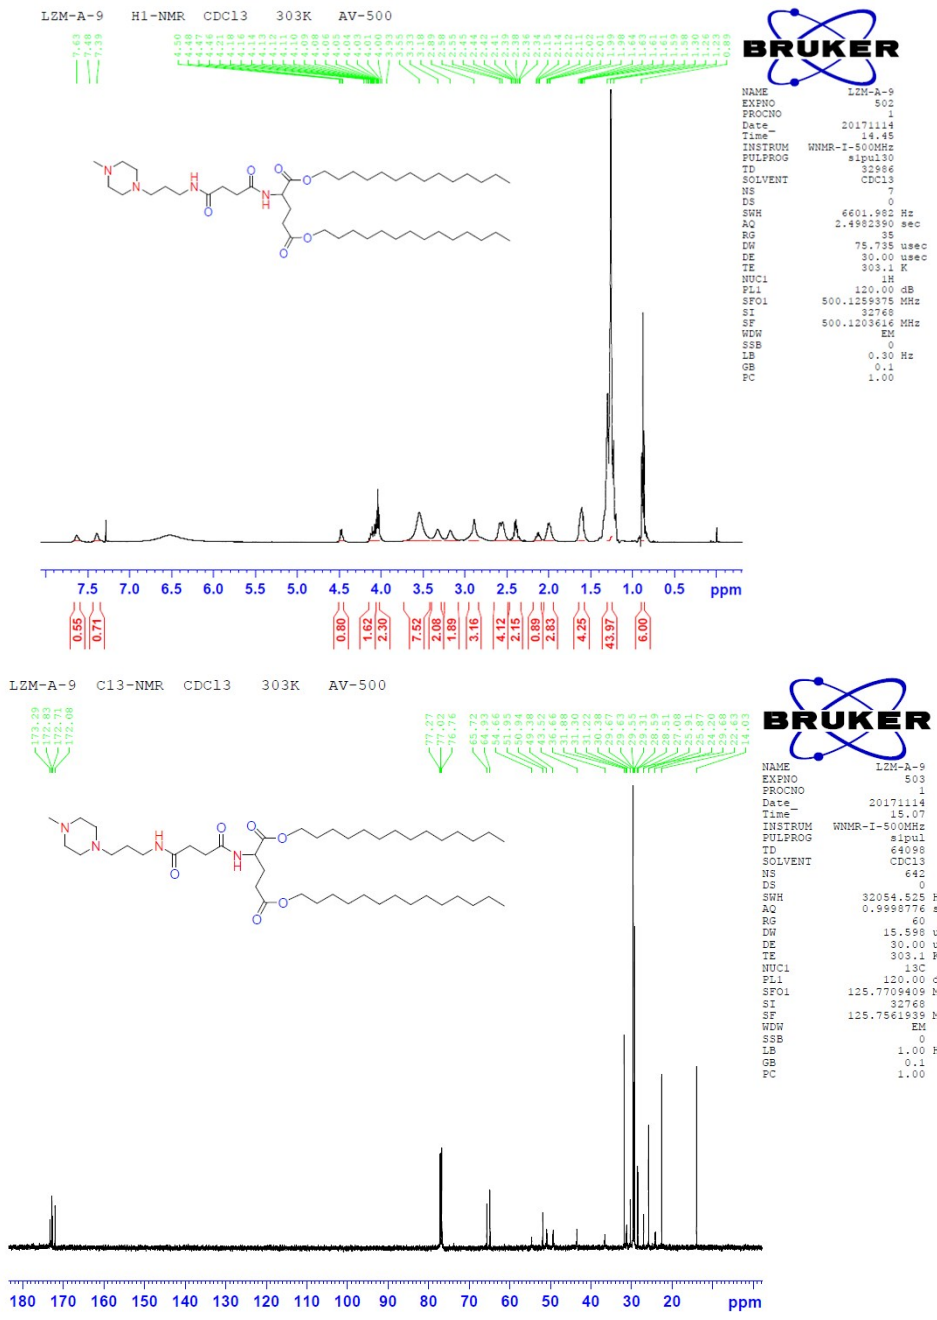

User Spectra

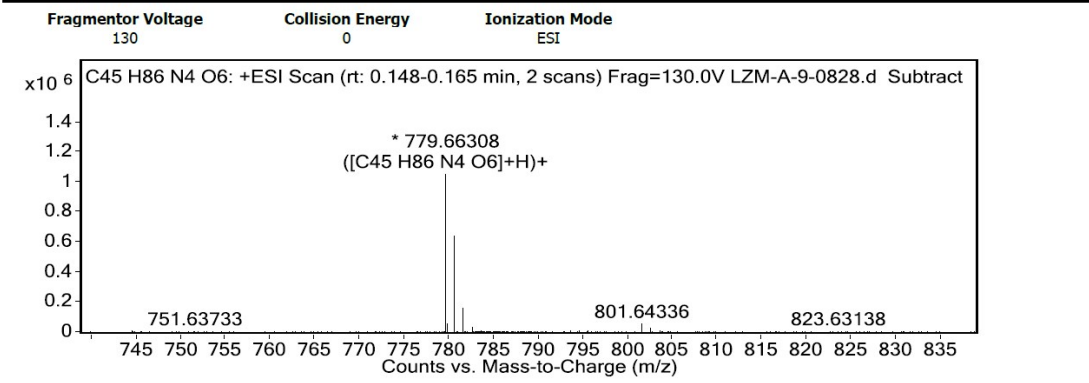

Figure S10. <sup>1</sup>H NMR, <sup>13</sup>C NMR and HRMS spectra of compound TA9

LZM-A-10-0622 H1-NMR CDCL3 303K AV-300

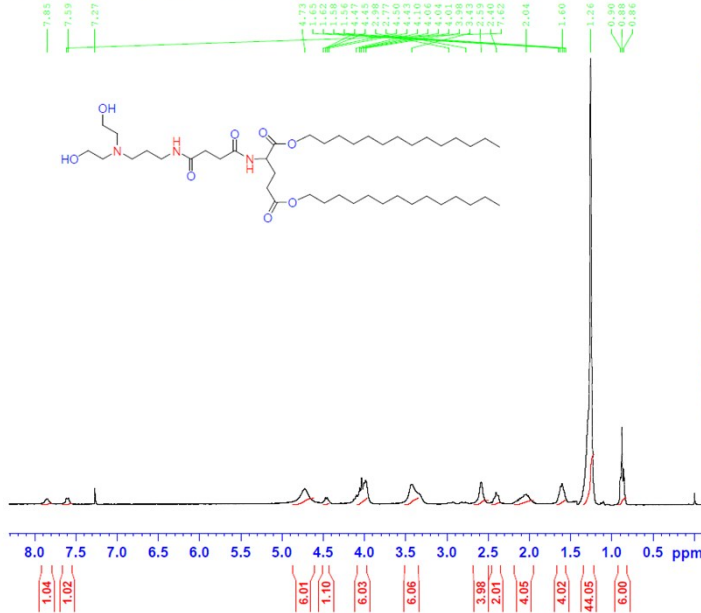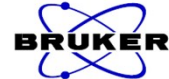

```

NAME LZM-A-10-0622-H
EXPNO 2
PROCNO 1
Date_ 20170622
Time 16.28
INSTRUM av500
PROBHD 5 mm FABBI 1H-
PULPROG zg30
TD 23980
SOLVENT CDCL3
NS 1
DS 0
SWH 5995.204 Hz
FIDRES 0.250008 Hz
AQ 1.9999820 sec
RG 101.6
DW 83.400 usec
DE 6.00 usec
TE 300.0 K
D1 1.20000005 sec

===== CHANNEL f1 =====
NUC1 1H
P1 8.80 usec
PL1 -2.00 dB
SFO1 300.1324010 MHz
SI 32768
SF 300.1300099 MHz
WDW EM
SSB 0
LB 0.30 Hz
GB 0
PC 1.00
    
```

LZM-A-10-0622 H1-NMR CDCL3 303K AV-300

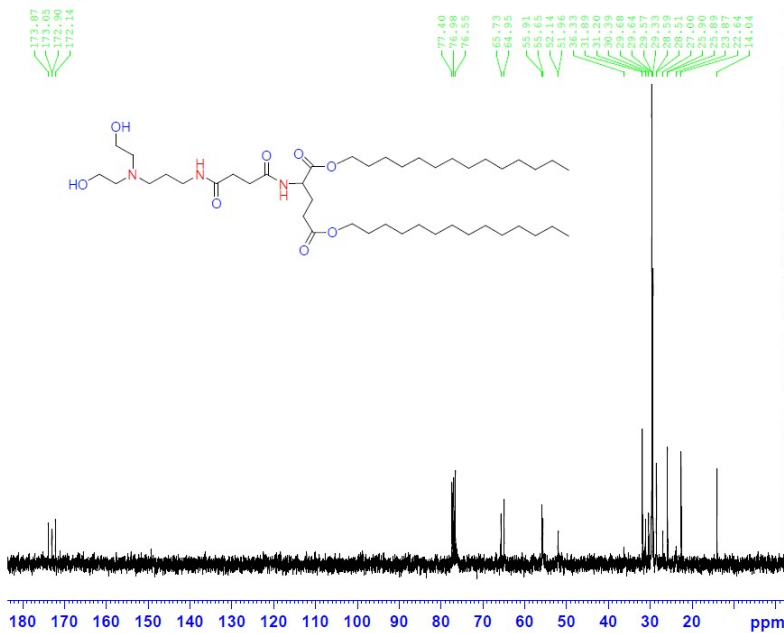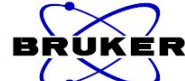

```

NAME LZM-A-10-0622-C
EXPNO 1002
PROCNO 1
Date_ 20170622
Time 16.21
INSTRUM av500
PROBHD 5 mm FABBI 1H-
PULPROG zgpg
TD 32768
SOLVENT CDCL3
NS 163
DS 0
SWH 19607.844 Hz
FIDRES 0.598384 Hz
AQ 0.8356340 sec
RG 102400
DW 25.500 usec
DE 39.43 usec
TE 308.0 K
D1 1.00000000 sec
d11 0.03000000 sec

===== CHANNEL f1 =====
NUC1 13C
P1 6.20 usec
PL1 -5.00 dB
SFO1 75.4767751 MHz

===== CHANNEL f2 =====
CPDPRG2 waltz16
NUC2 1H
PCPD2 80.00 usec
PL2 -2.00 dB
PL12 18.00 dB
SFO2 300.1312005 MHz
SI 32768
SF 75.4677520 MHz
WDW EM
SSB 0
LB 1.00 Hz
GB 0
PC 0.80
    
```

### User Spectra

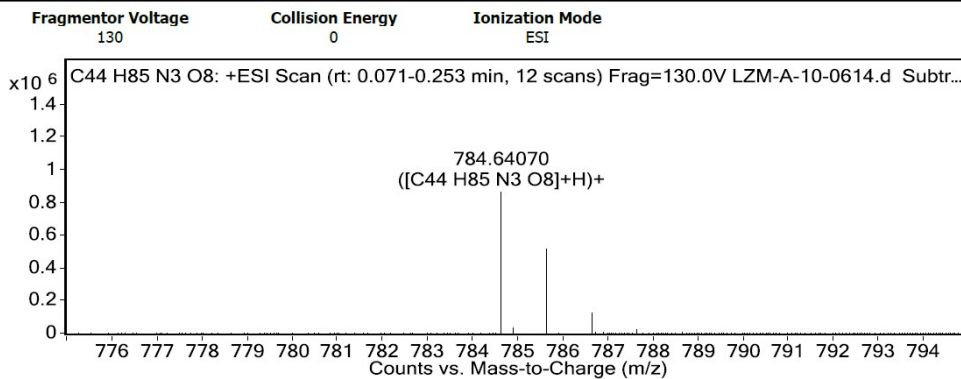

Figure S11. <sup>1</sup>H NMR, <sup>13</sup>C NMR and HRMS spectra of compound TA10

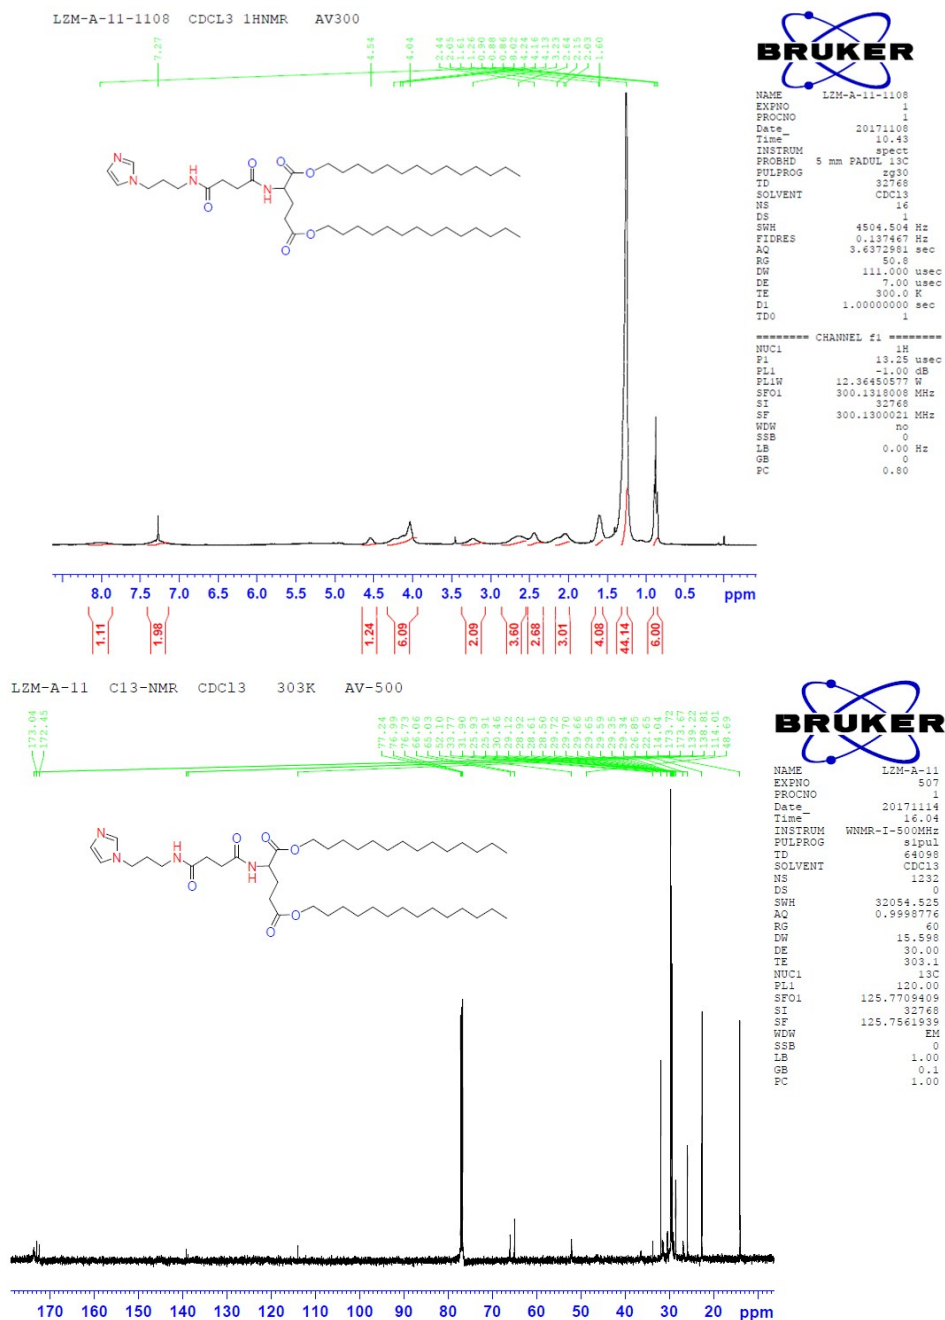

### User Spectra

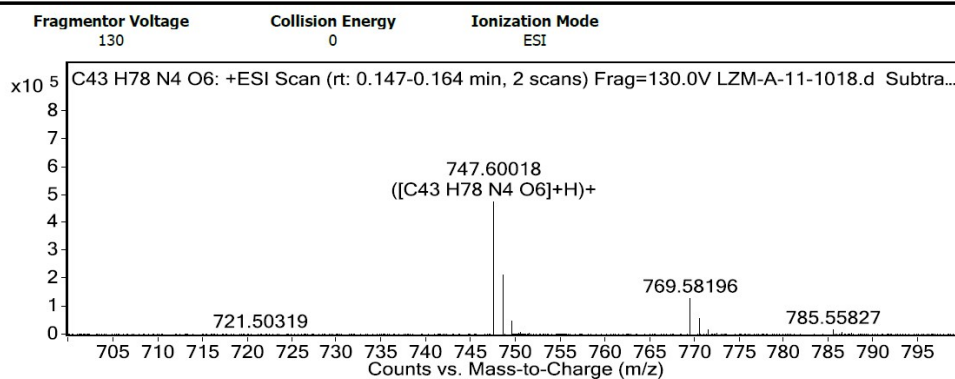

Figure S12. <sup>1</sup>H NMR, <sup>13</sup>C NMR and HRMS spectra of compound TA11

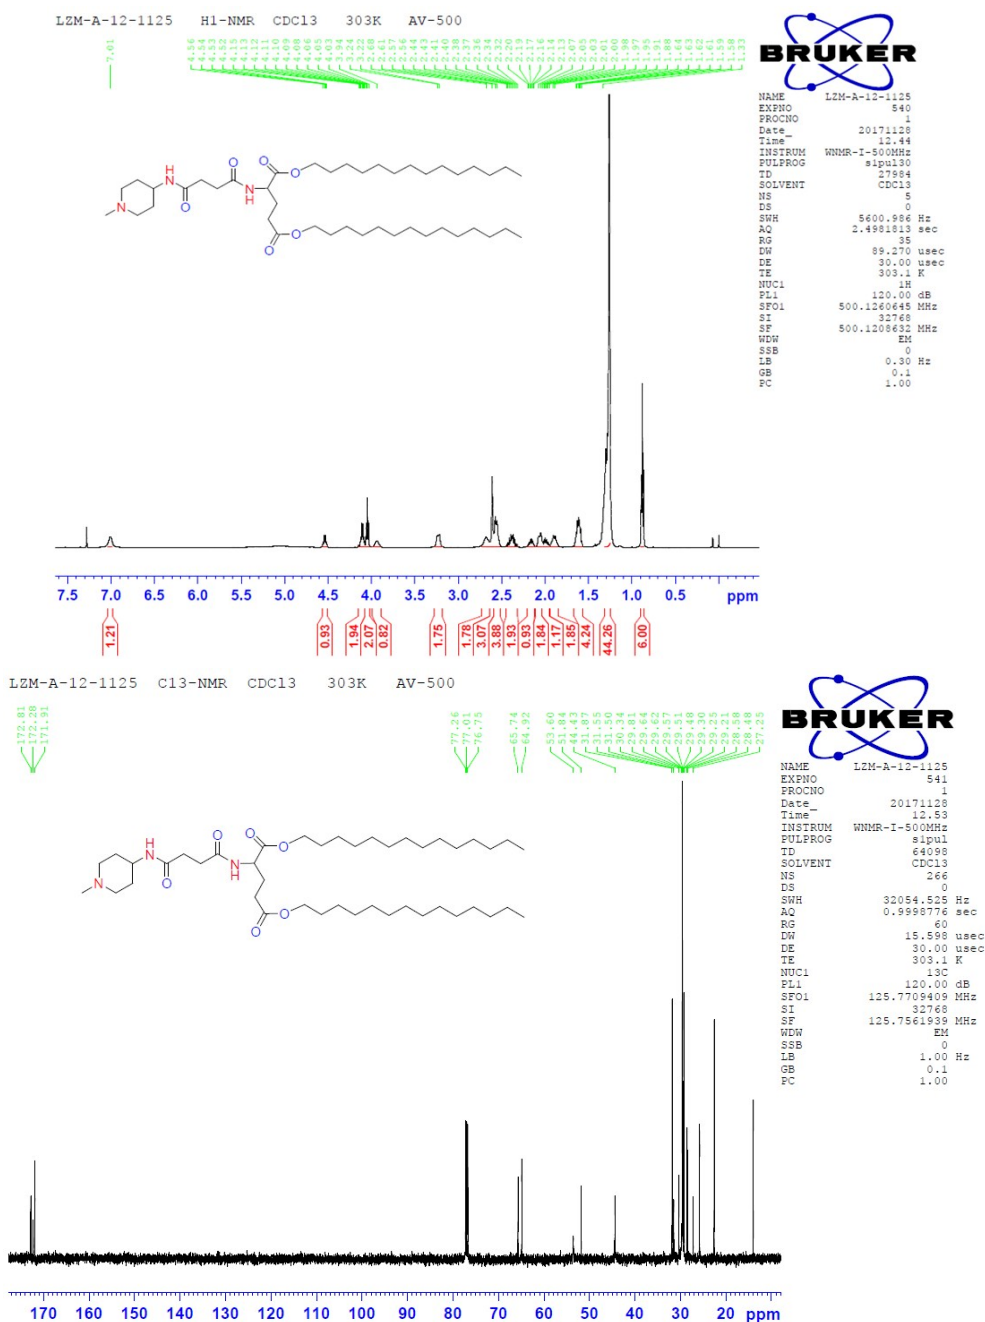

User Spectra

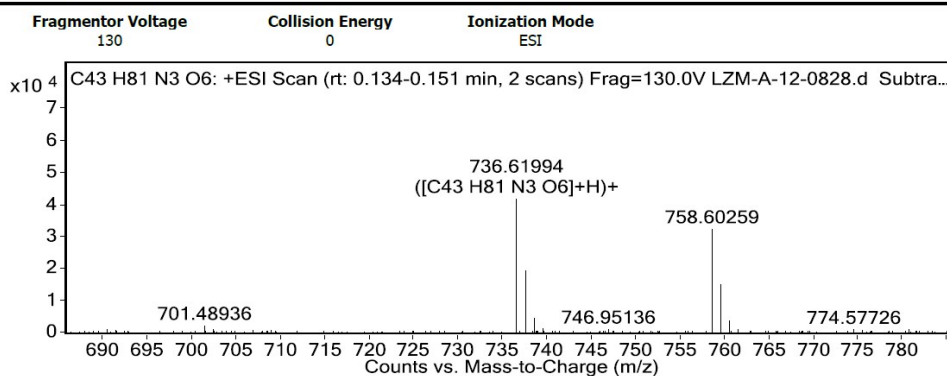

Figure S13. <sup>1</sup>H NMR, <sup>13</sup>C NMR and HRMS spectra of compound TA12



LZM-A-13-1013 CDCl3 1HNMR AV300

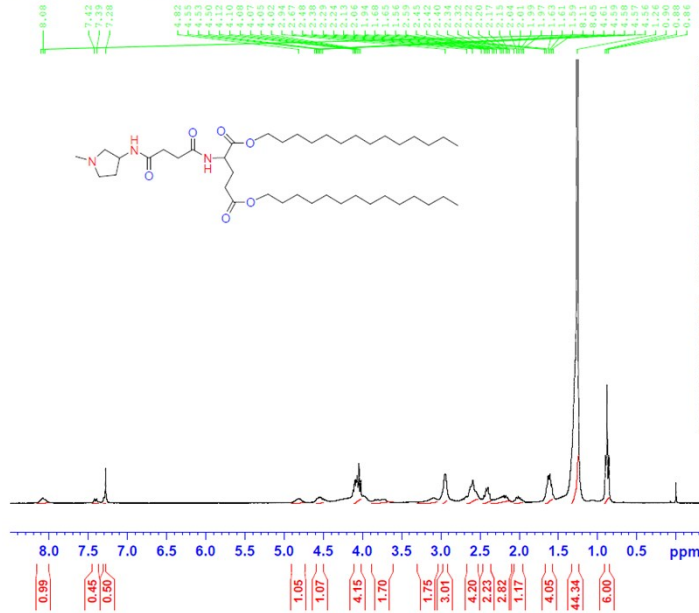

**BRUKER**

```

NAME LZM-A-13-1013
EXPNO 1
PROCNO 1
Date_ 20171013
Time 10.45
INSTRUM spect
PROBHD 5 mm PADUL 13C
PULPROG zg30
TD 32768
SOLVENT CDCl3
NS 16
DS 1
SWH 7211.539 Hz
FIDRES 0.220079 Hz
AQ 2.12719646 sec
RG 64
DW 69.333 usec
DE 7.00 usec
TE 300.0 K
D1 1.00000000 sec
TD0 1

===== CHANNEL f1 =====
NUC1 1H
P1 13.25 usec
PL1 -1.00 dB
PL1W 12.36450577 W
SFO1 300.1331514 MHz
SI 32768
SF 300.1300011 MHz
WDW no
SSB 0
LB 0.00 Hz
GB 0
PC 0.90
    
```

LZM-A-13-1013 C13-NMR CDCl3 303K AV-300

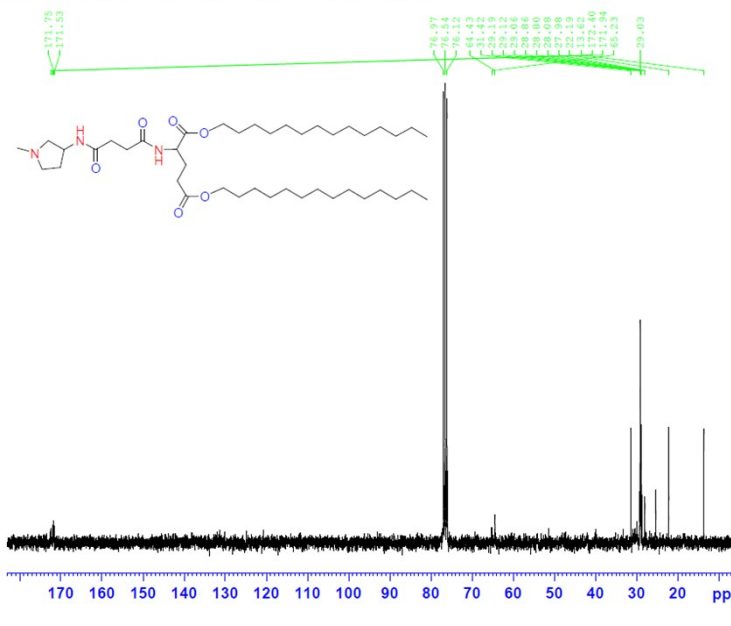

**BRUKER**

```

NAME LZM-A-13-1013
EXPNO 2
PROCNO 1
Date_ 20171013
Time 11.01
INSTRUM spect
PROBHD 5 mm PADUL 13C
PULPROG zgpg30
TD 65536
SOLVENT CDCl3
NS 237
DS 4
SWH 16666.666 Hz
FIDRES 0.254913 Hz
AQ 1.8661300 sec
RG 45.2
DW 30.000 usec
DE 7.00 usec
TE 300.0 K
D1 2.00000000 sec
D11 0.03000000 sec
TD0 1

===== CHANNEL f1 =====
NUC1 13C
P1 11.80 usec
PL1 1.00 dB
PL1W 26.73651505 W
SFO1 75.4752203 MHz

===== CHANNEL f2 =====
CPDPRG2 waltz16
NUC2 1H
PCPD2 80.00 usec
PL2 -1.00 dB
PL12 14.62 dB
PL13 14.60 dB
PL2W 12.36450577 W
PL12W 0.33896211 W
PL13W 0.34054673 W
SFO2 300.1312005 MHz
SI 32768
SF 75.4677867 MHz
WDW EM
SSB 0
LB 1.00 Hz
GB 0
PC 1.10
    
```

**User Spectra**

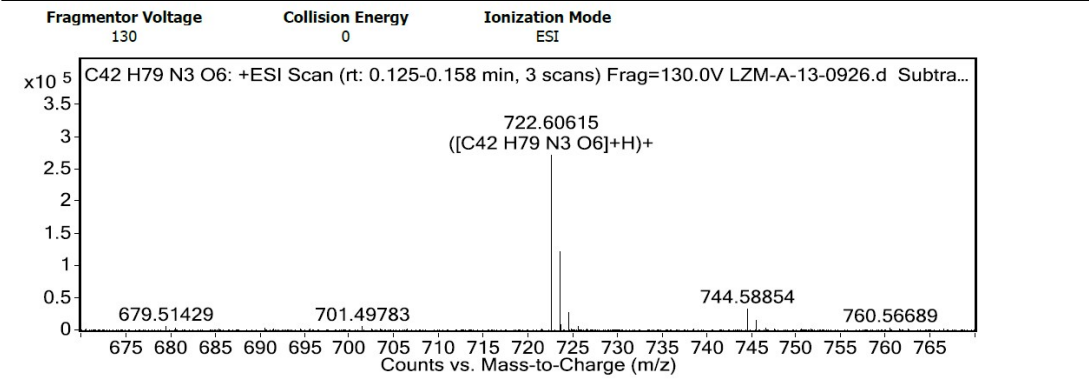

**Figure S14.** <sup>1</sup>H NMR, <sup>13</sup>C NMR and HRMS spectra of compound TA13

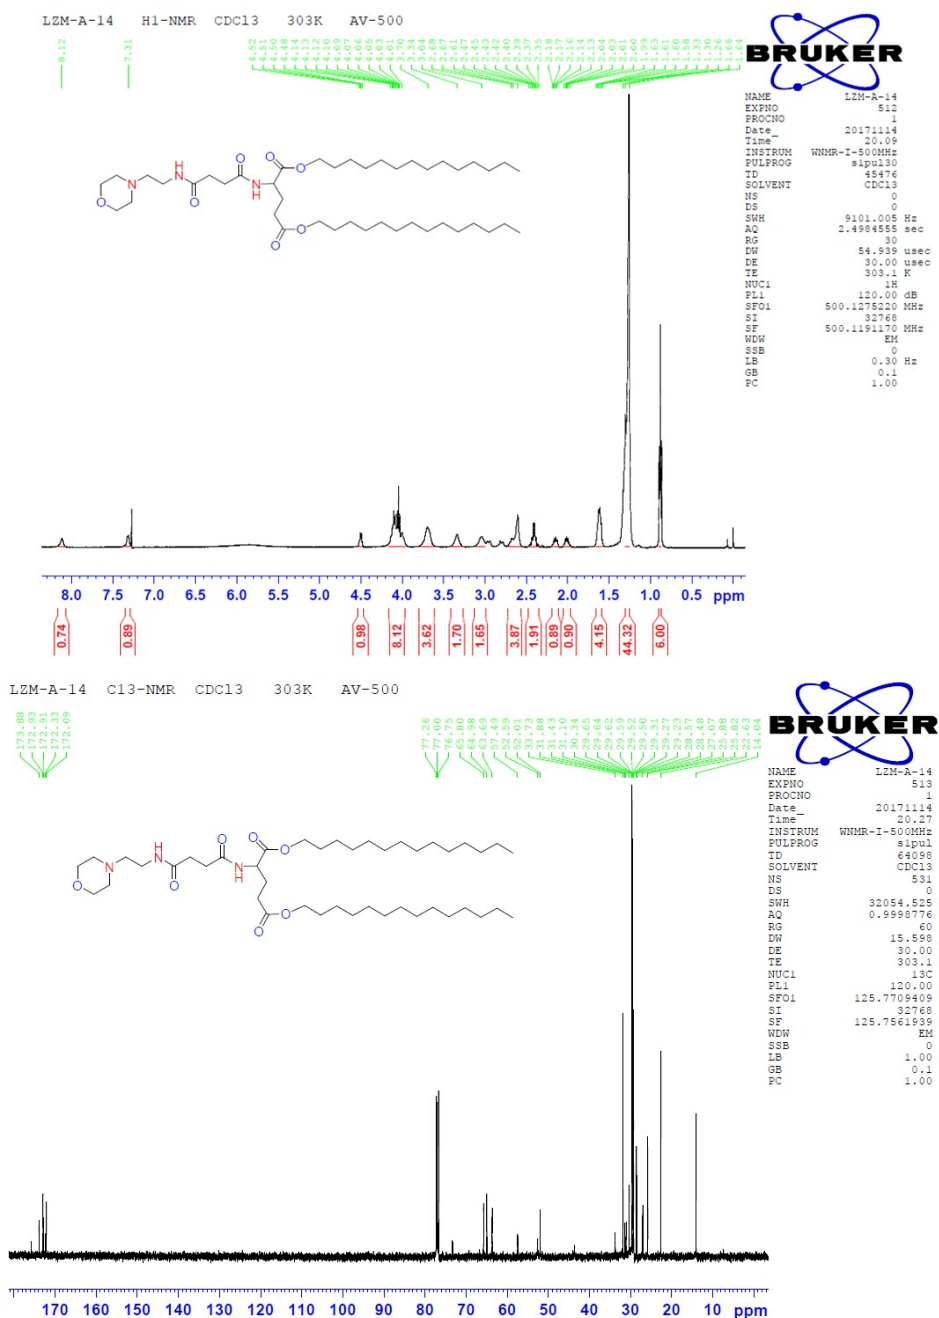

### User Spectra

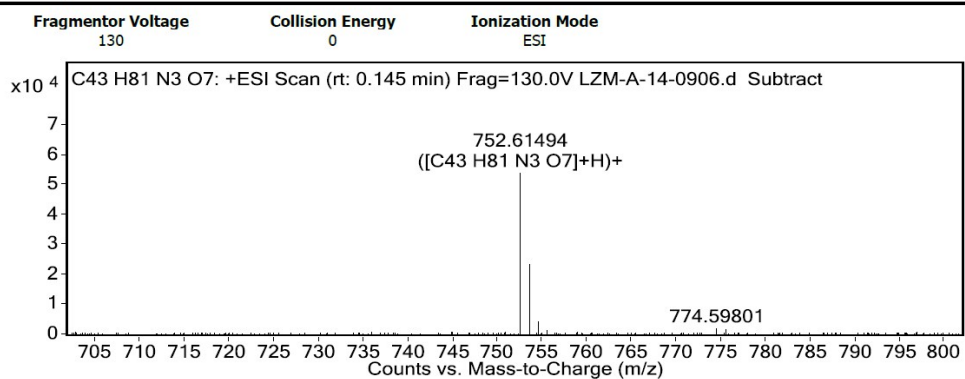

Figure S15. <sup>1</sup>H NMR, <sup>13</sup>C NMR and HRMS spectra of compound TA14

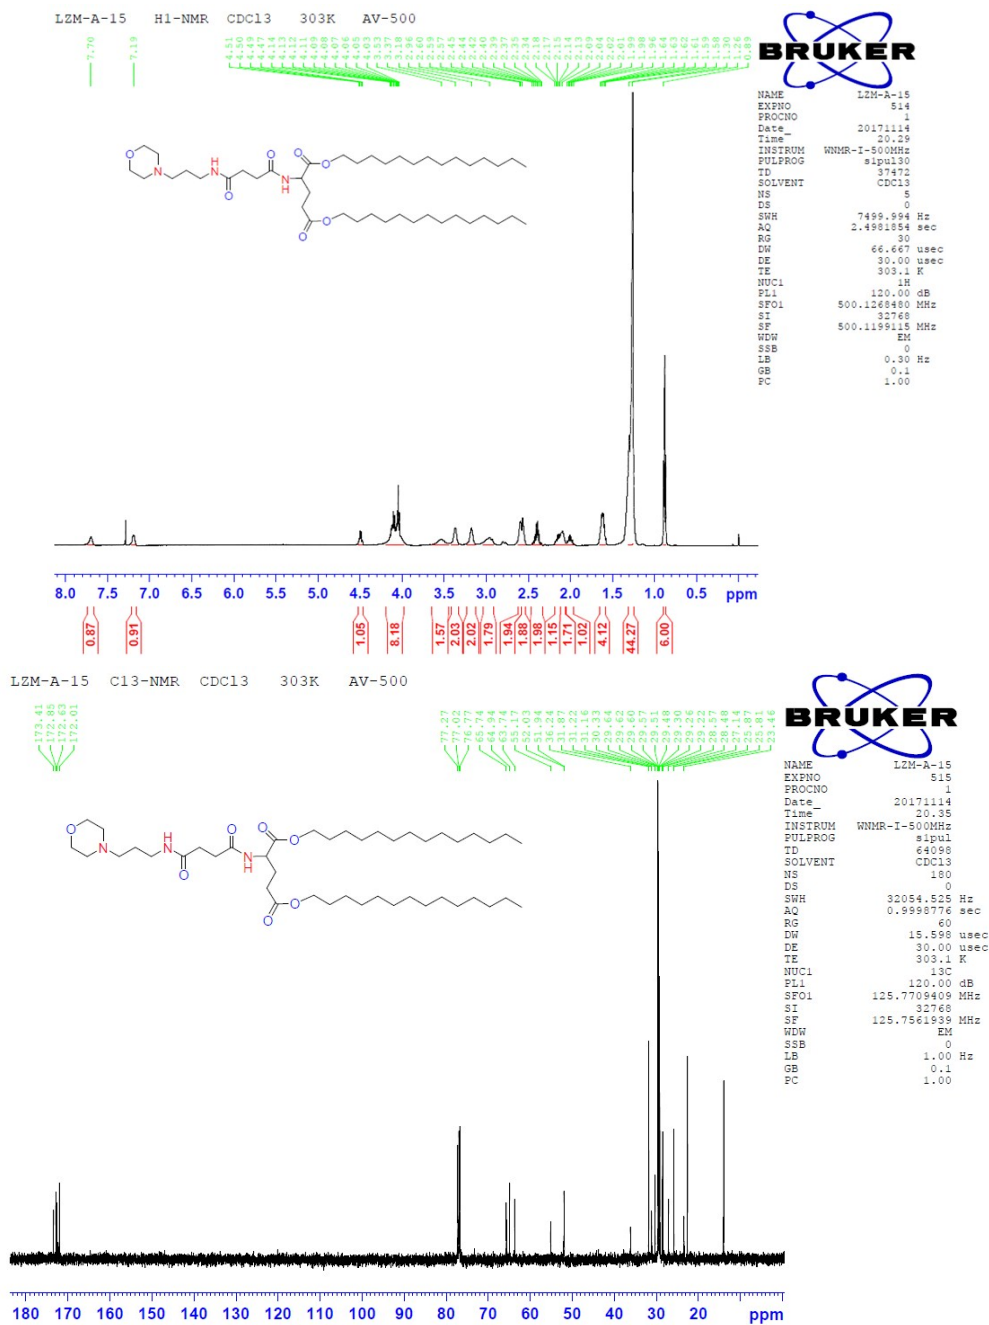

### User Spectra

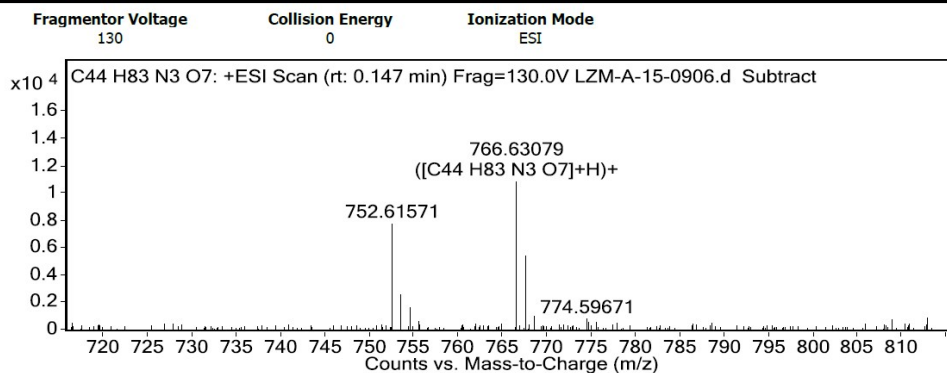

Figure S16. <sup>1</sup>H NMR, <sup>13</sup>C NMR and HRMS spectra of compound TA15

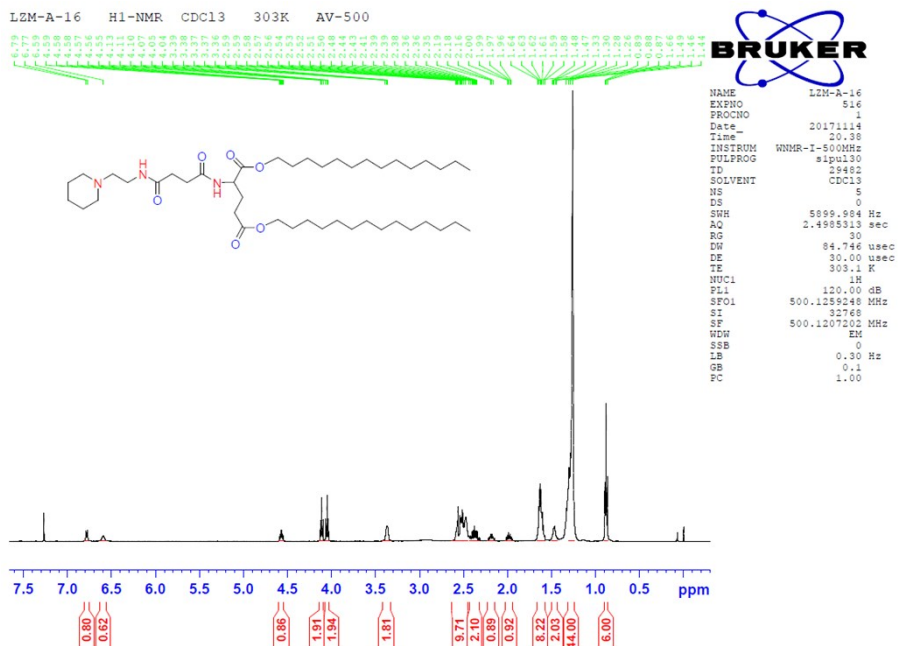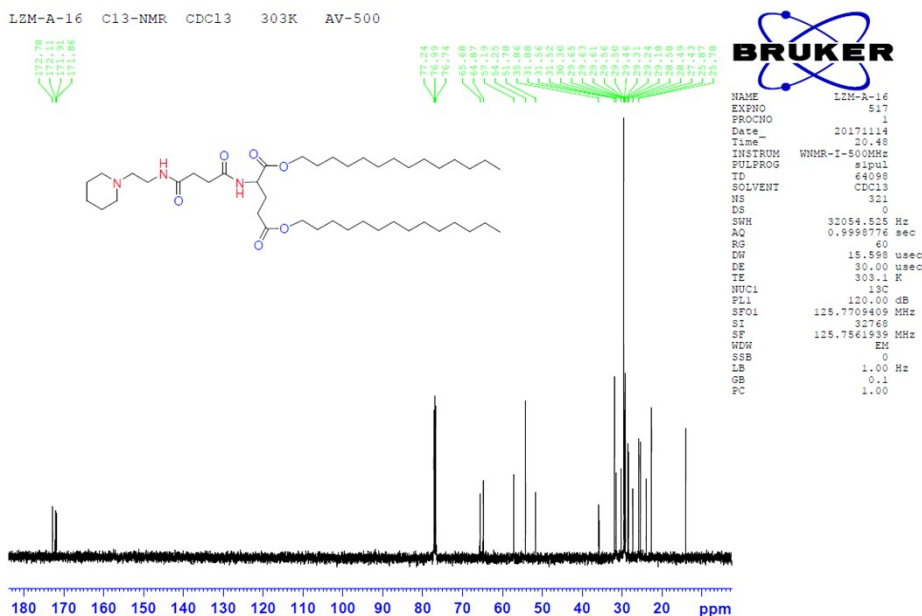

### User Spectra

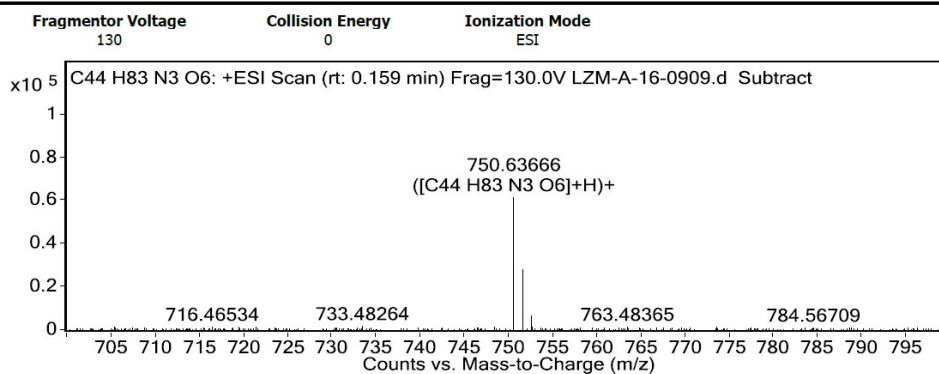

Figure S17. <sup>1</sup>H NMR, <sup>13</sup>C NMR and HRMS spectra of compound TA16

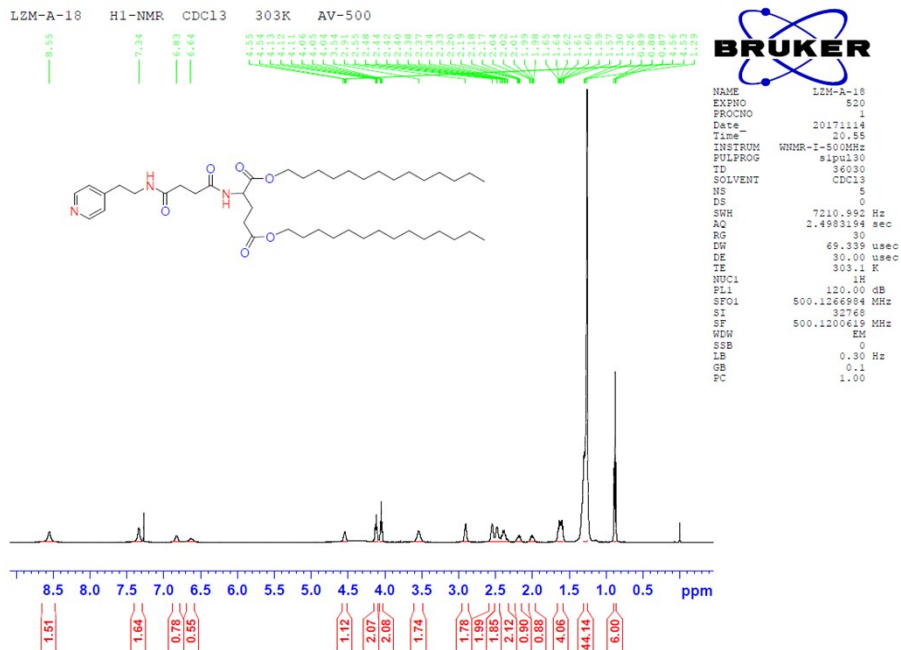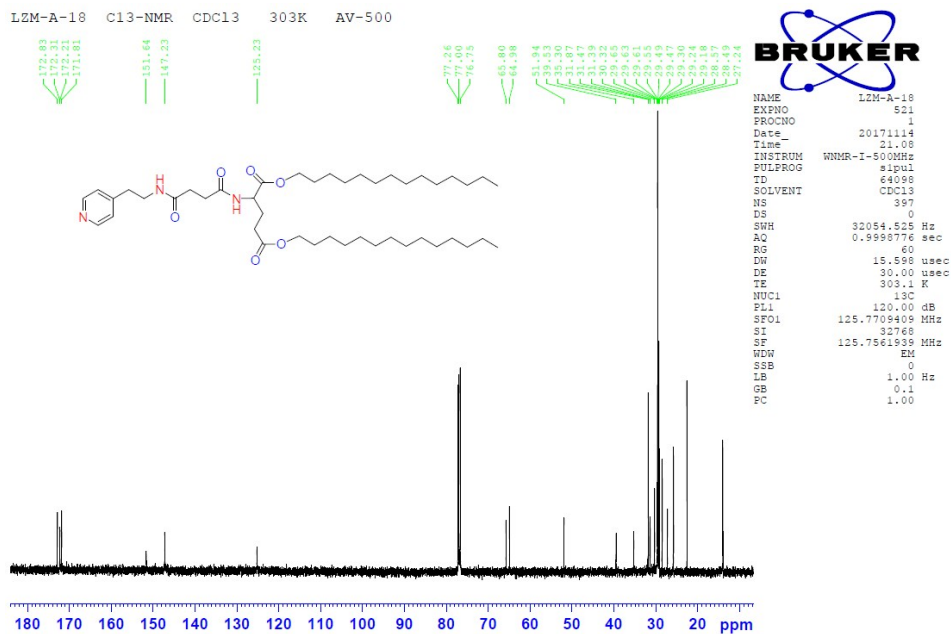

### User Spectra

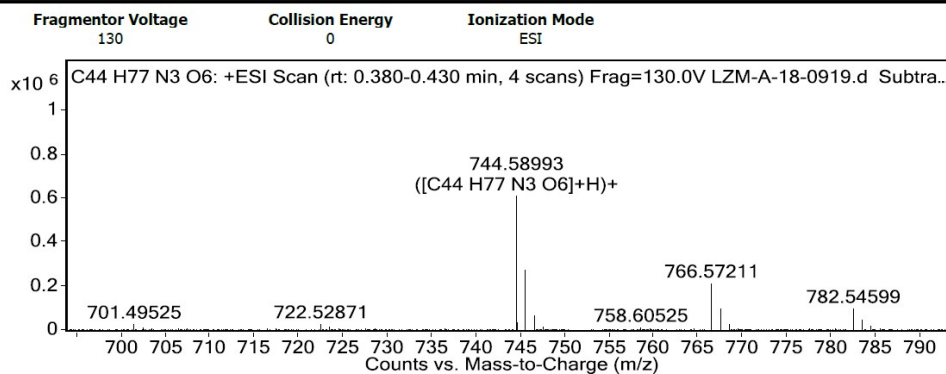

**Figure S18.** <sup>1</sup>H NMR, <sup>13</sup>C NMR and HRMS spectra of compound TA17

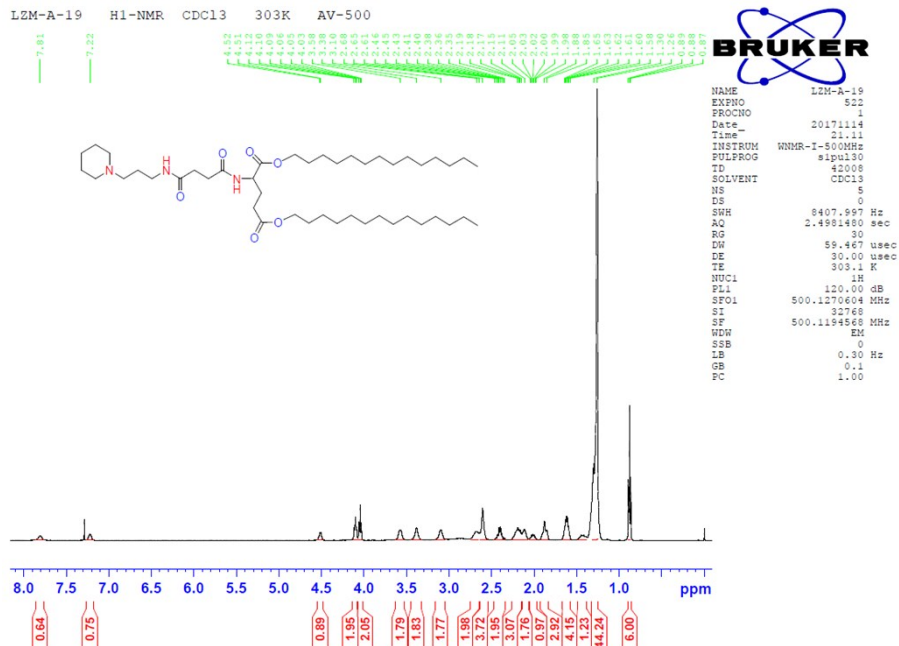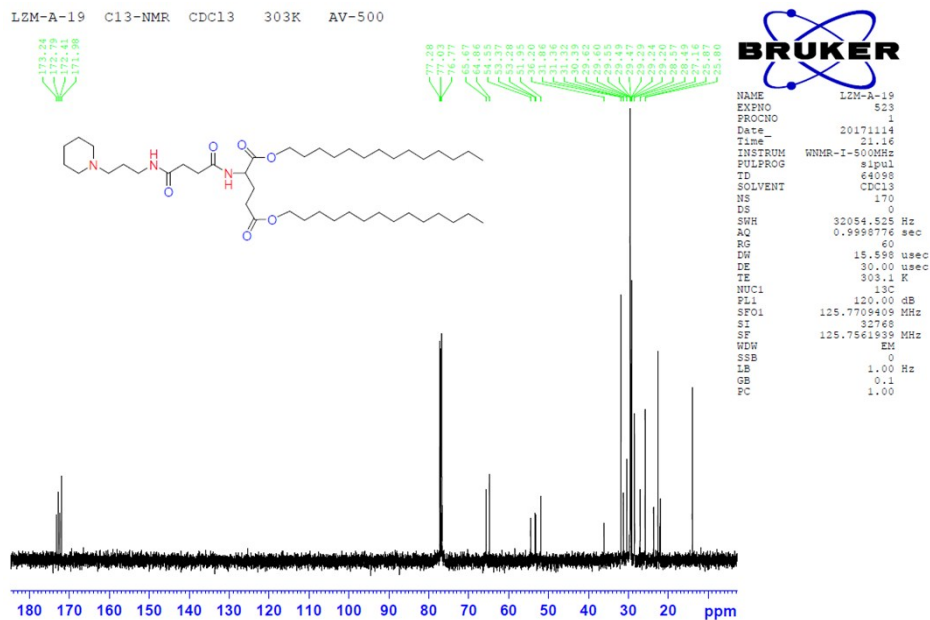

### User Spectra

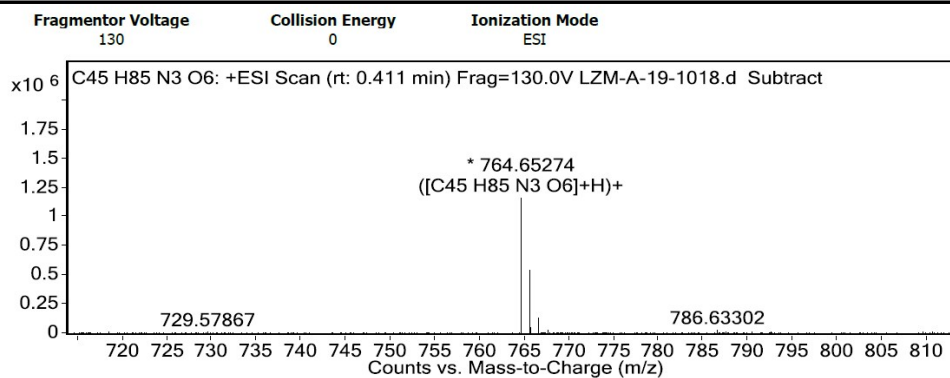

Figure S19. <sup>1</sup>H NMR, <sup>13</sup>C NMR and HRMS spectra of compound TA18

LZM-A-20 H1-NMR CDC13 303K AV-500

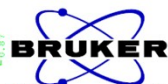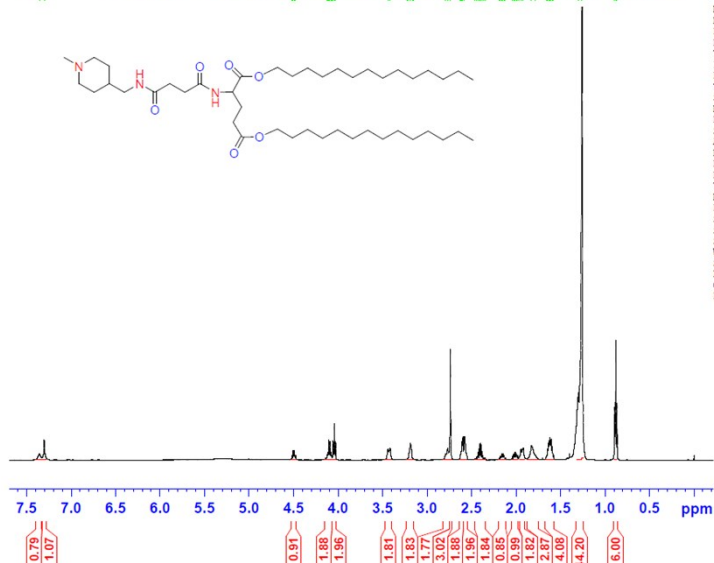

```

NAME LZM-A-20
EXPNO 524
PROCNO 1
Date_ 20171114
Time_ 21.35
INSTRUM WNMN-1-500MHz
PULPROG zgpg30
TD 65494
SOLVENT CDC13
NS 5
DS 0
SWH 7101.989 Hz
AQ 2.4982238 sec
RG 30
DW 70.403 usec
DE 30.00 usec
TE 303.1 K
NUC1 1H
FL1 120.00 dB
SFO1 500.1264526 MHz
SI 32768
SF 500.1201028 MHz
WDW EM
SSB 0
LB 0.30 Hz
GB 0.1
PC 1.00
    
```

LZM-A-20 C13-NMR CDC13 303K AV-500

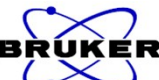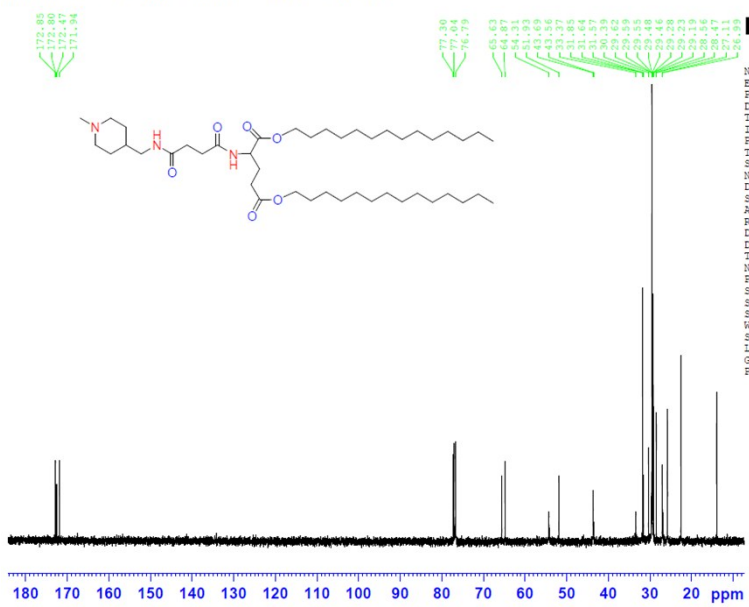

```

NAME LZM-A-20
EXPNO 525
PROCNO 1
Date_ 20171114
Time_ 21.26
INSTRUM WNMN-1-500MHz
PULPROG zgpg1
TD 64098
SOLVENT CDC13
NS 218
DS 0
SWH 32054.525 Hz
AQ 0.9998776 sec
RG 60
DW 15.598 usec
DE 30.00 usec
TE 303.1 K
NUC1 13C
FL1 120.00 dB
SFO1 125.7709408 MHz
SI 32768
SF 125.7561939 MHz
WDW EM
SSB 0
LB 1.00 Hz
GB 0.1
PC 1.00
    
```

User Spectra

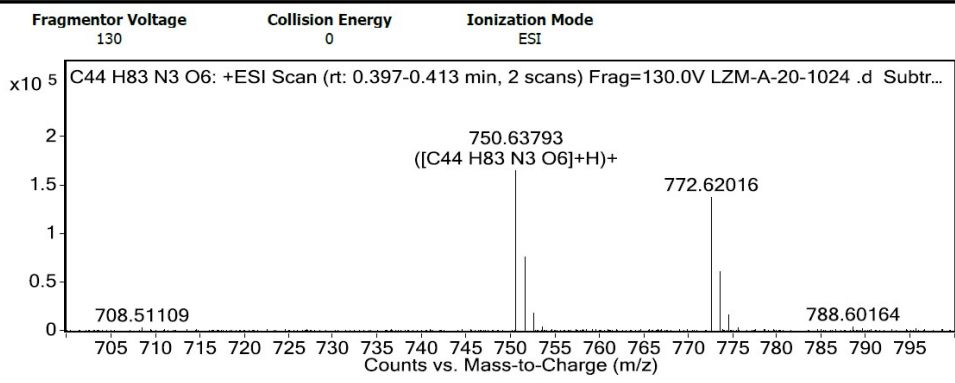

Figure S20. <sup>1</sup>H NMR, <sup>13</sup>C NMR and HRMS spectra of compound TA19

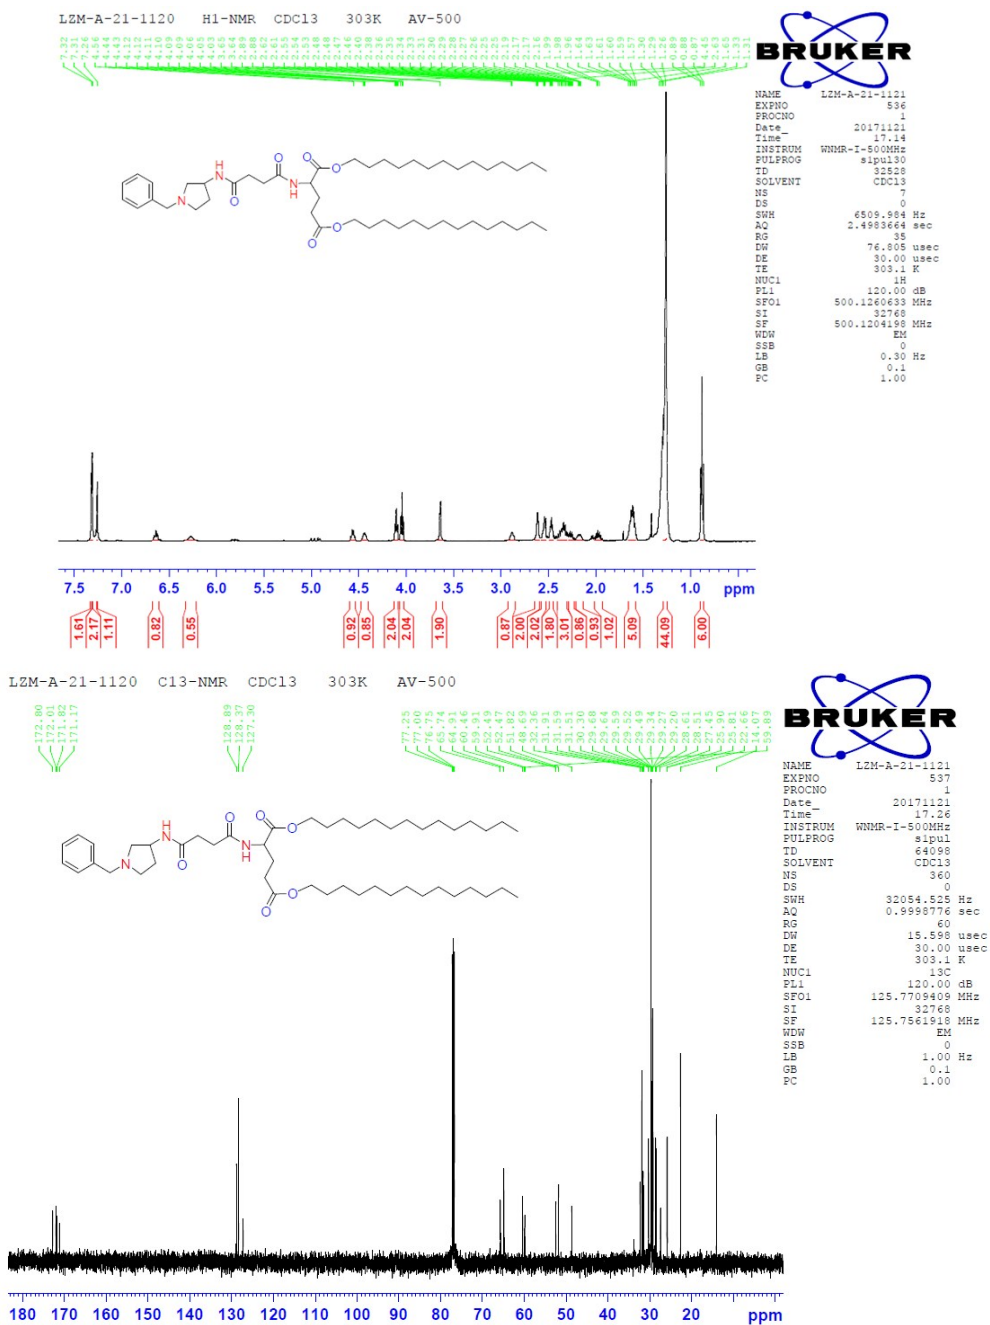

### User Spectra

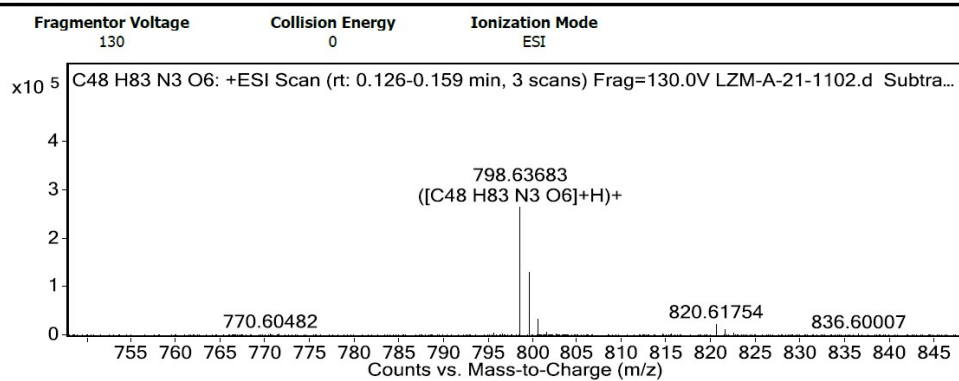

Figure S21. <sup>1</sup>H NMR, <sup>13</sup>C NMR and HRMS spectra of compound TA20



LZM-A-22 H1-NMR CDCl3 303K AV-500

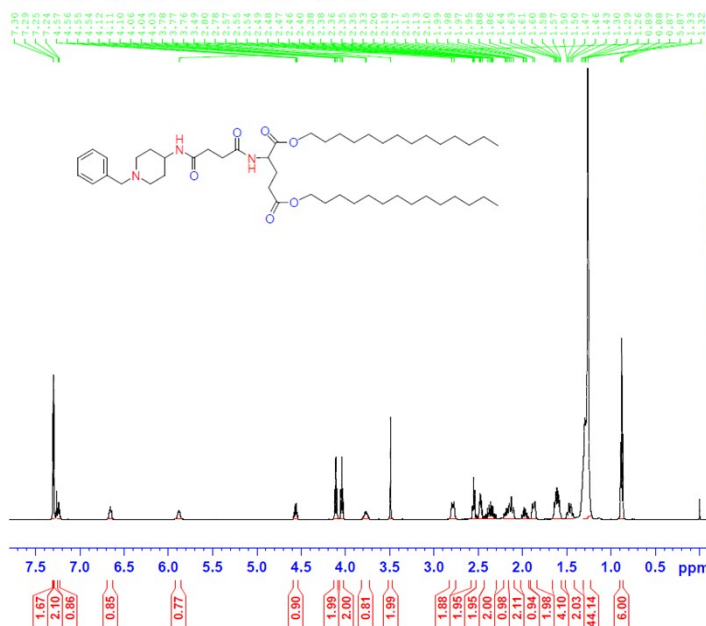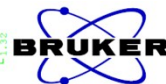

NAME LZM-A-22  
 EXPNO 528  
 PROCNO 1  
 Date\_ 20171114  
 Time\_ 21.45  
 INSTRUM WNMN-I-500MHz  
 FULPROG zgpg30  
 TD 32028  
 SOLVENT CDCl3  
 NS 5  
 DS 0  
 SWH 6409.982 Hz  
 AQ 2.4993408 sec  
 RG 36  
 DW 78.003 usec  
 DE 30.00 usec  
 TE 303.1 K  
 NUC1 1H  
 P1 120.00 dB  
 SF01 500.1288500 MHz  
 SI 32768  
 SF 500.1204675 MHz  
 WDW EM  
 SSB 0  
 LB 0.30 Hz  
 GB 0.1  
 PC 1.00

LZM-A-22 C13-NMR CDCl3 303K AV-500

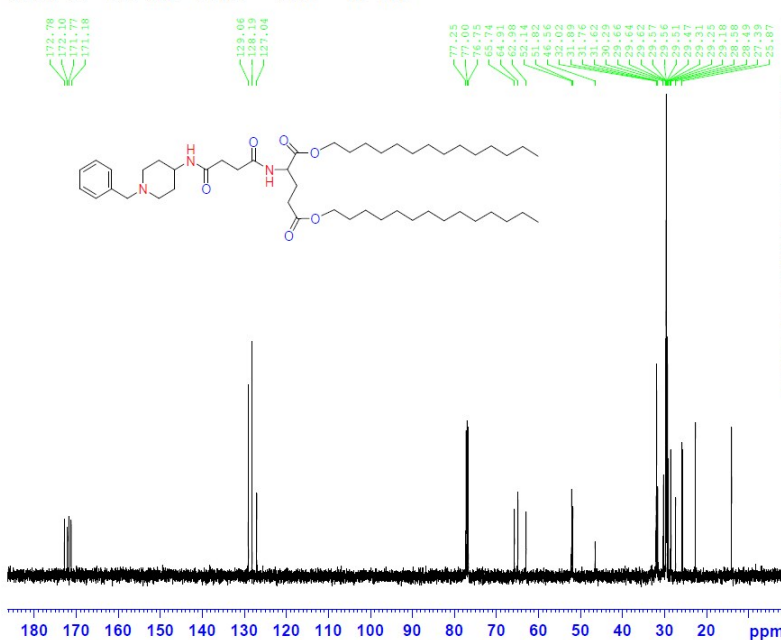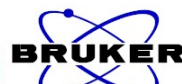

NAME LZM-A-22  
 EXPNO 529  
 PROCNO 1  
 Date\_ 20171114  
 Time\_ 21.52  
 INSTRUM WNMN-I-500MHz  
 FULPROG zgpg30  
 TD 64058  
 SOLVENT CDCl3  
 NS 200  
 DS 0  
 SWH 32054.525 Hz  
 AQ 0.9998776 sec  
 RG 60  
 DW 15.598 usec  
 DE 30.00 usec  
 TE 303.1 K  
 NUC1 13C  
 P1 120.00 dB  
 SF01 125.7705409 MHz  
 SI 32768  
 SF 125.7561937 MHz  
 WDW EM  
 SSB 0  
 LB 1.00 Hz  
 GB 0.1  
 PC 1.00

User Spectra

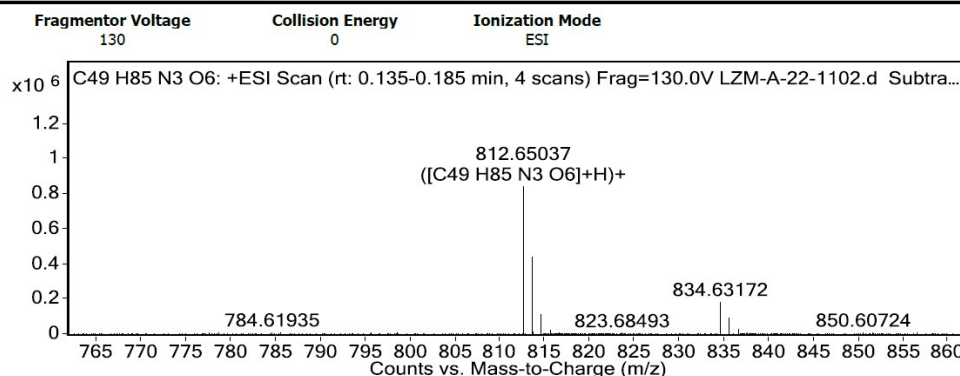

Figure S22. <sup>1</sup>H NMR, <sup>13</sup>C NMR and HRMS spectra of compound TA21

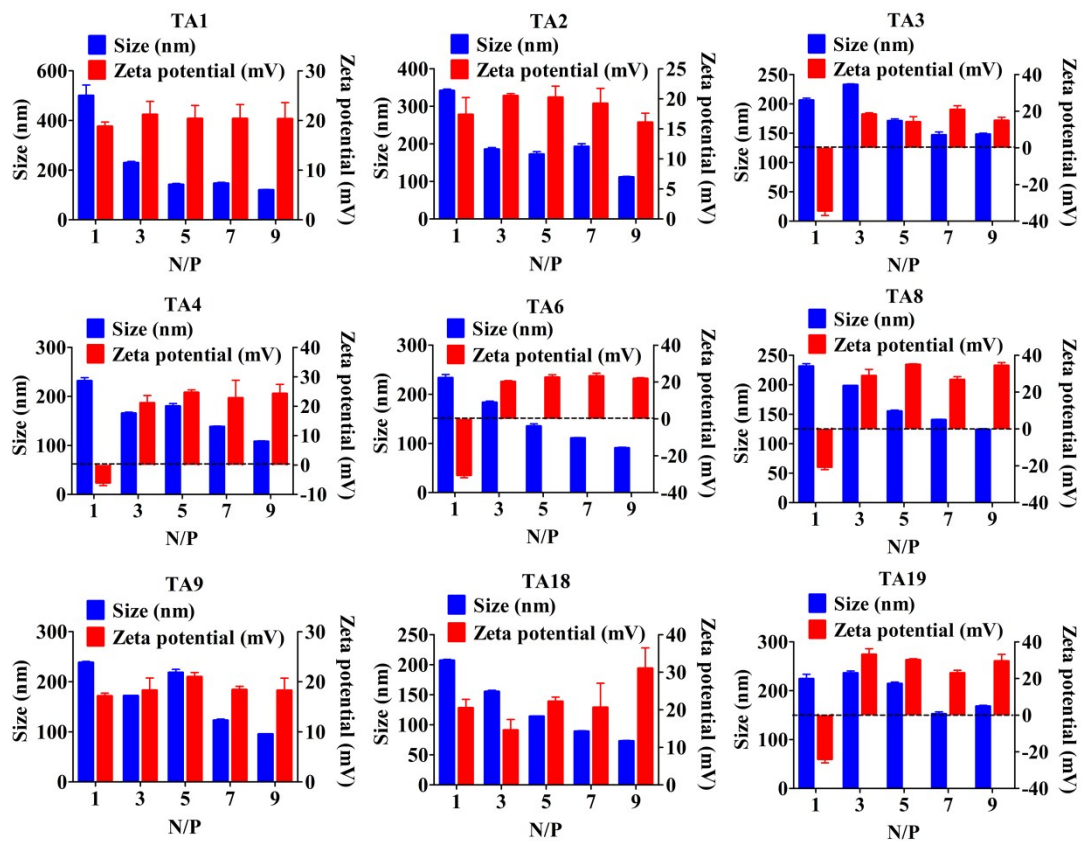

**Figure S23.** Mean particle sizes and zeta potentials of lipoplexes at N/P ratios of 1, 3, 5, 7 and 9.

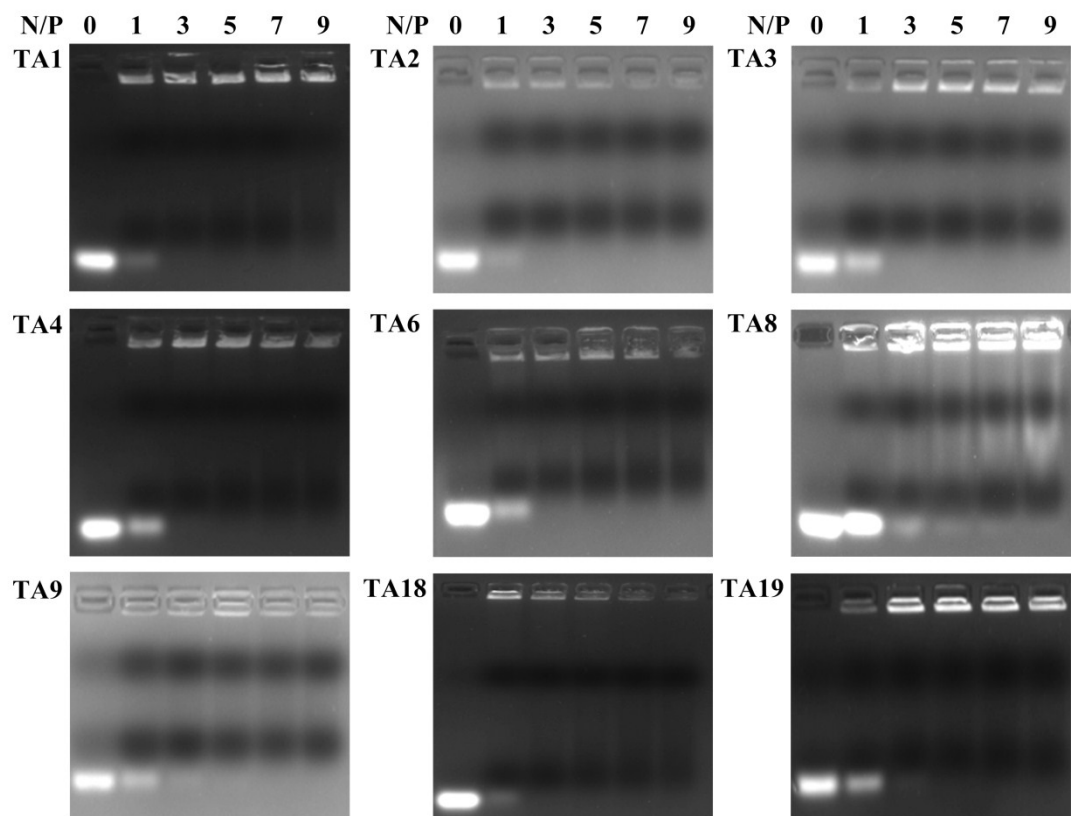

**Figure S24.** Agarose gel electrophoresis of lipoplexes at N/P ratios of 1, 3, 5, 7 and 9, indicating the successful siRNA encapsulation at the N/P more than 5. (N/P = 0 stands for naked siRNA)

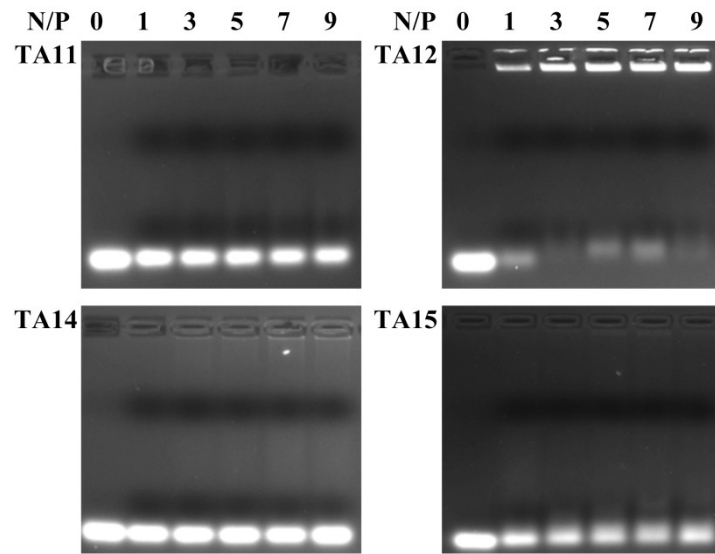

**Figure S25.** Agarose gel electrophoresis of lipoplexes at N/P ratios of 1, 3, 5, 7 and 9. However, the lipoplexes of TA11, TA12, TA14 and TA15 cannot successfully encapsulate siRNA at all N/P ratios. (N/P = 0 stands for naked siRNA)

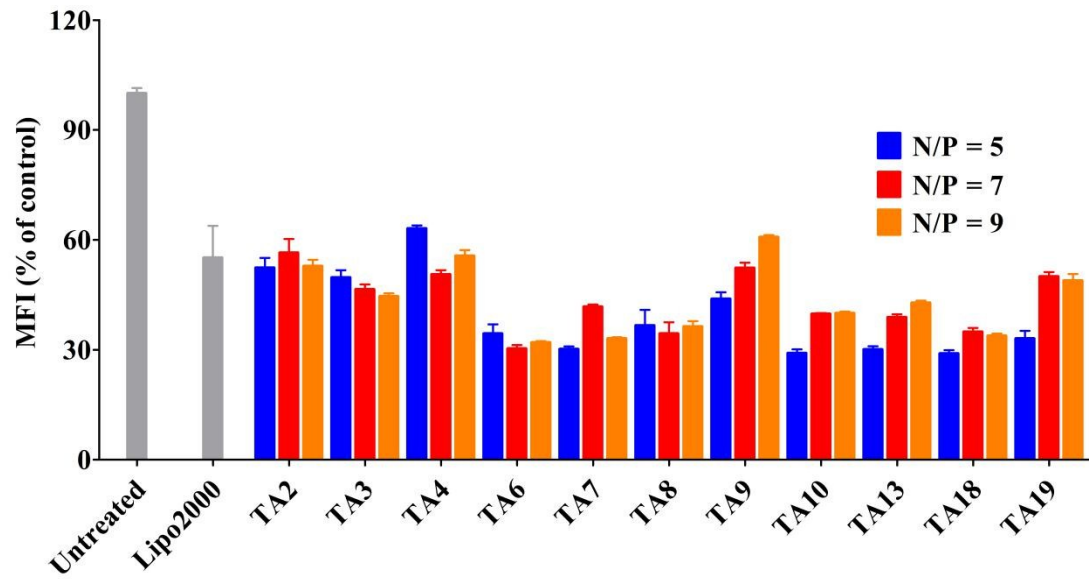

**Figure S26.** *In vitro* gene silencing efficiency of lipoplexes in HeLa-eGFP cells using flow cytometry. Cells were treated with different lipoplexes at recommended siRNA transfection concentration (200 nM) of Lipofectamine 2000 at N/P ratios of 5, 7 and 9. Lipofectamine 2000 served as a positive control. Untreated cells served as a negative control.

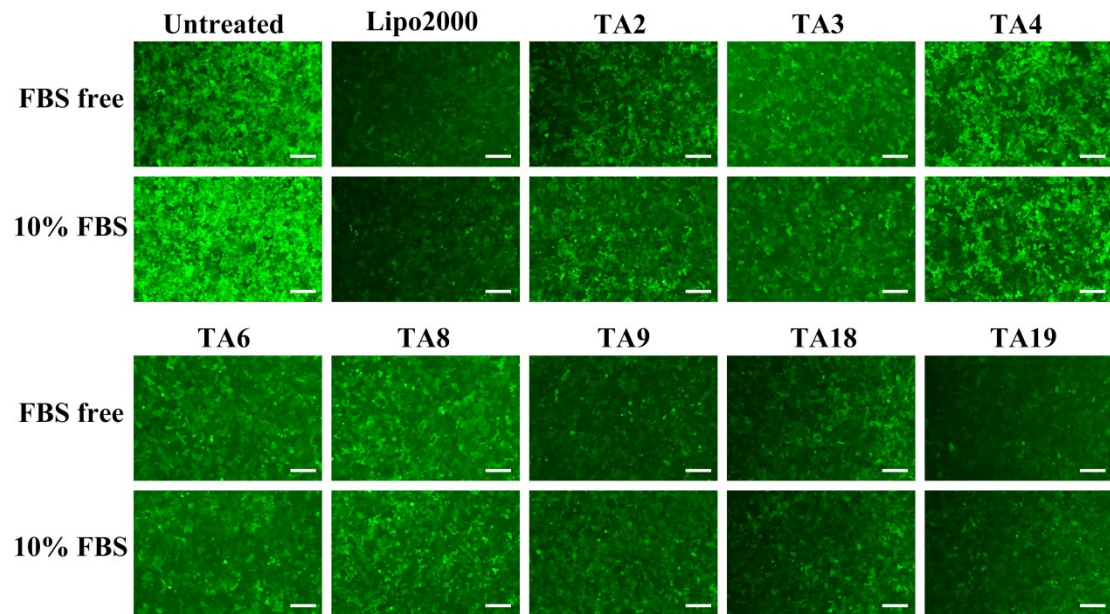

**Figure S27.** *In vitro* gene silencing efficiency of the lipoplexes in Hela-eGFP cells by inverted fluorescence microscope. Cells were treated with different lipoplexes at N/P ratios of 5 at recommended siRNA transfection concentration (200 nM) of Lipofectamine 2000 in the absence and presence of 10% (v/v) serum. Lipofectamine 2000 served as a positive control. Untreated cells served as a negative control. Scale bar: 100  $\mu$ m.

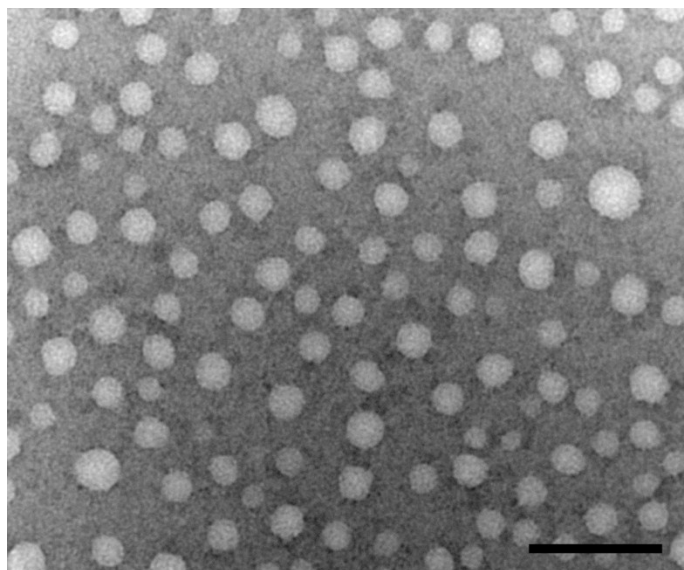

**Figure S28.** TEM image of TA13 cationic liposomes, indicating uniform and spherical nanoparticles. Scale bar: 100 nm.

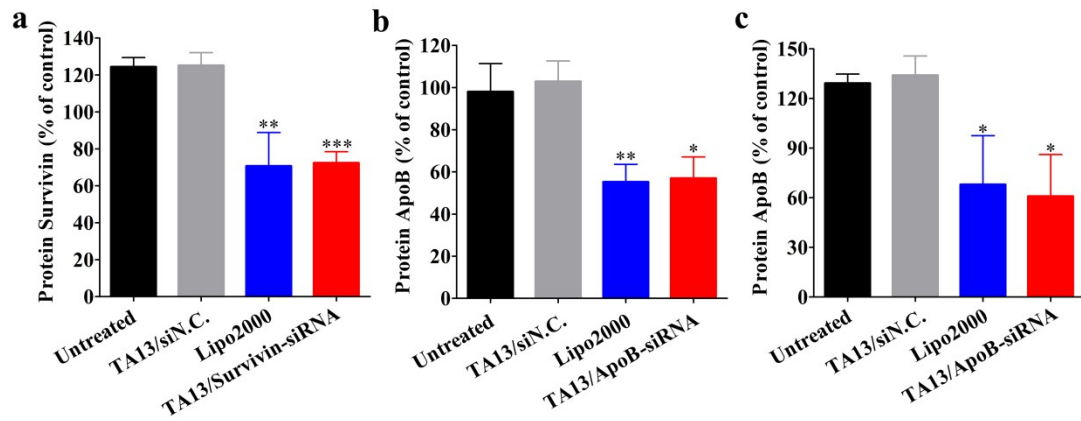

**Figure S29.** Semiquantitative determination of western blotting images. **(a)** MCF-7 cells were treated with TA13/Survivin-siRNA and the expression of Survivin protein was determined by western blotting. **(b)** HepG2 cells were treated with TA13/ApoB-siRNA and the expression of Survivin protein was determined by western blotting. **(c)** L02 cells were treated with TA13/ApoB-siRNA and the expression of Survivin protein was determined by western blotting. Lipo2000 was used as a positive control. \* $P < 0.05$ , \*\* $P < 0.01$ , \*\*\* $P < 0.001$ , compared with the untreated groups.



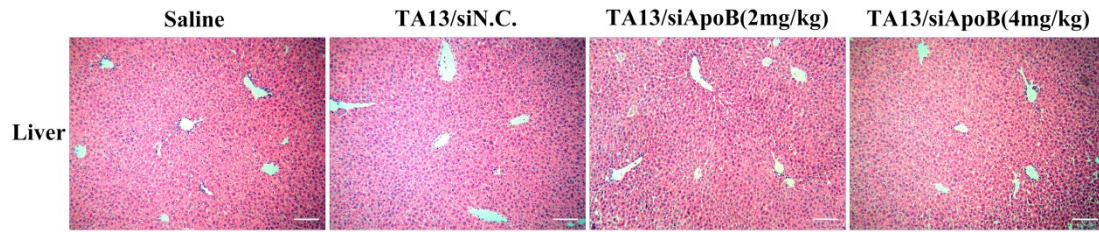

**Figure S30.** Histopathological analysis of the livers that collected from the C57BL/6 mice treated with saline, TA13/siN.C. at 2 mg siRNA/kg and TA13/ApoB-siRNA at 2 mg siRNA/kg or 4 mg siRNA/kg. H&E-stained liver sections revealed that no significant change was observed for all four groups of mice. Scale bar: 100  $\mu$ m.

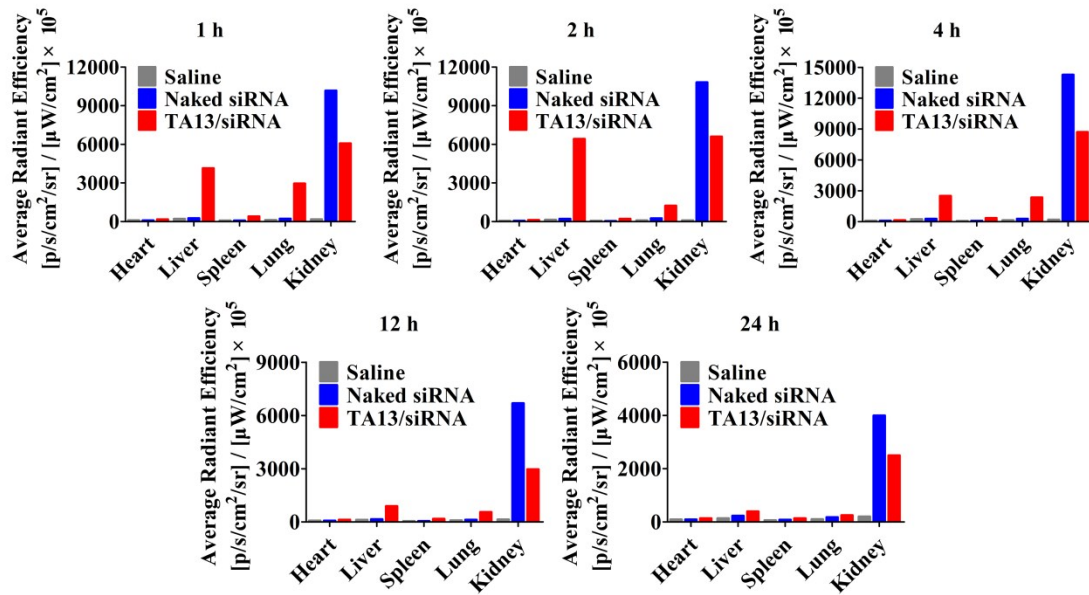

**Figure S31.** Semiquantitative analyses of fluorescence intensity of Cy5 within isolated major organs from C57BL/6 mice treated with TA13/Cy5-siRNA (1 mg/kg) at 1 h, 2 h, 4 h, 12 h, and 24 h post administration using a software package included with the *in vivo* imaging system.

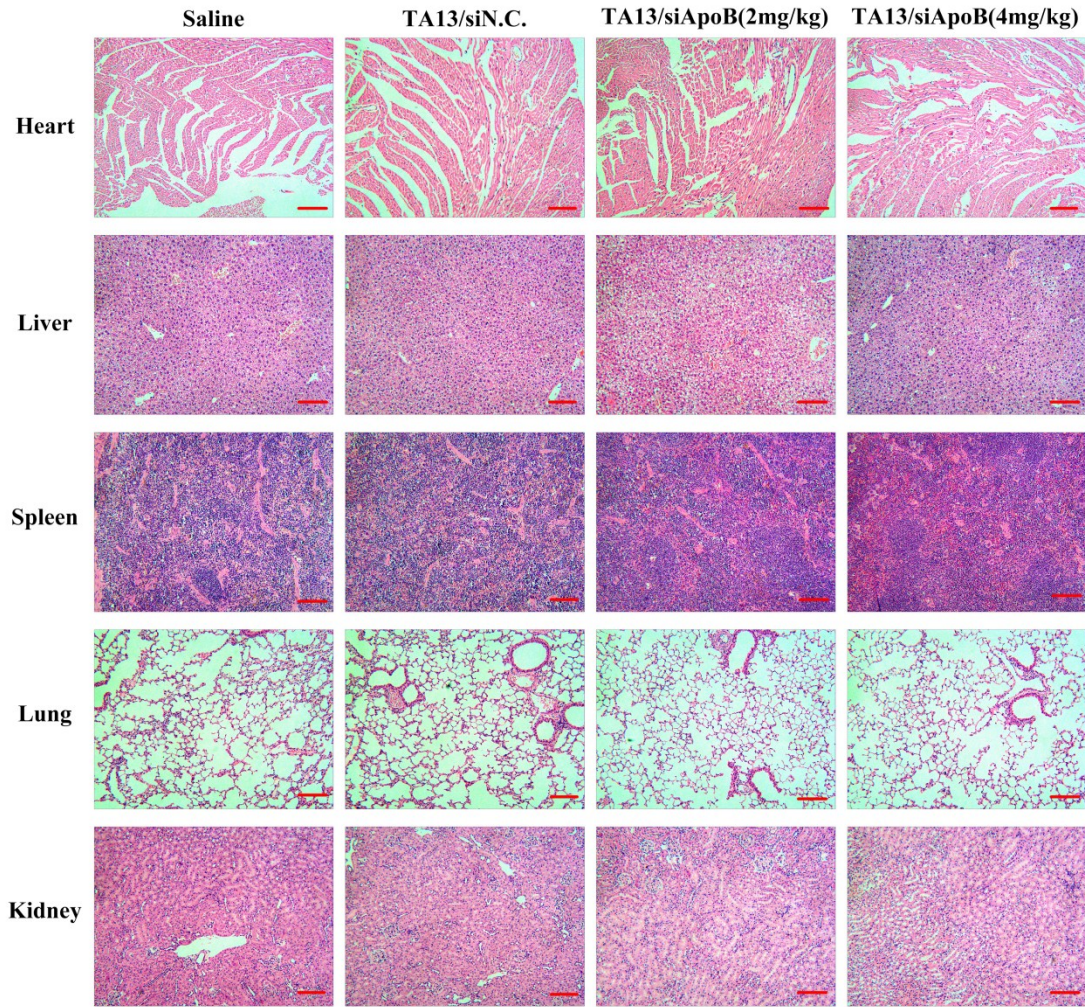

**Figure S32.** Histopathological analysis of the major organs that collected from the hypercholesterolemia mice treated with saline, TA13/siN.C. at 2 mg siRNA/kg and TA13/ApoB-siRNA at 2 mg siRNA/kg or 4 mg siRNA/kg. H&E-stained organs sections revealed that liver sections of four groups showed a vacuole-like structure, due to fatty liver in hypercholesterolemia mice, and no significant change was observed in other organs sections for all four groups of mice. Scale bar: 100  $\mu$ m.
